# Supplementary material for: Using metal substrates to enhance the reactivity of graphene towards Diels–Alder reactions
Source: Royal Society of Chemistry journal article supplement (doi:10.1039/d2cp01842j), 2022-01-01
Supplement: d2cp01842j1.pdf [file d2cp01842j1.pdf]

## Using Metal Substrate to Enhance the Reactivity of Graphene towards Diels-Alder Reaction

Xiaojian Yang,<sup>[a],[b],#</sup> Feiran Chen,<sup>[a],#</sup> Min A. Kim,<sup>[c]</sup> Haitao Liu,<sup>[c],\*</sup> Lawrence M. Wolf<sup>[a],\*</sup>

Mingdi Yan<sup>[a],\*</sup>

<sup>[a]</sup>X. Yang, F. Chen, Prof. L. Wolf, Prof. M. Yan  
Department of Chemistry, University of Massachusetts Lowell  
1 University Ave., Lowell, MAH 01854  
E-mail: [Mingdi\\_Yan@uml.edu](mailto:Mingdi_Yan@uml.edu), [Lawrence\\_Wolf@uml.edu](mailto:Lawrence_Wolf@uml.edu)

<sup>[b]</sup>Current address:  
China Aerospace Science and Industry Corporation Limited  
40 Yungangbeili, Beijing, China 100074

<sup>[c]</sup>M. Kim, Prof. H. Liu  
Department of Chemistry, University of Pittsburgh  
4200 Fifth Ave, Pittsburgh, PA 15260  
E-mail: [hliu@pitt.edu](mailto:hliu@pitt.edu)

<sup>#</sup>These authors contributed equally to this work.

### Table of Contents

**Figure S1.** Raman spectra of graphene on silicon wafer casted with *p*-xylene followed by heating.

**Figure S2-S19.** Histograms of Raman  $I_D/I_G$ ,  $L_D$ , and  $n_D$  of G/SiO<sub>2</sub>/Si, (B) G/Cu, (C) G/Ni after reacting with DMBD or MAH at 50 °C, 100 °C, 150 °C for different lengths of time.

**Figure S20.** The interlayer distance of graphene adsorbed on Cu (111) and Ni (111) surface.

**Table S1.** SCF energies (Ry).

**Figure S21.** Charge density difference plots of INT<sub>G</sub>, INT<sub>G/Cu</sub>, and INT<sub>G/Ni</sub> for cis-DMBD. Charge transfers ( $\Delta q$ ) are determined from a Bader charge analysis of the electron densities.

**Figure S22.** Minimum energy paths as determined from NEB calculations of the DA reaction using DMBD (blue) and MAH (red) on G/Ni highlighting asynchronicity of bond formation.  $r_1$  and  $r_2$  are the C-C forming bonds in Å.

**Table S2.** Geometry structure for all the optimized compounds and transition states.

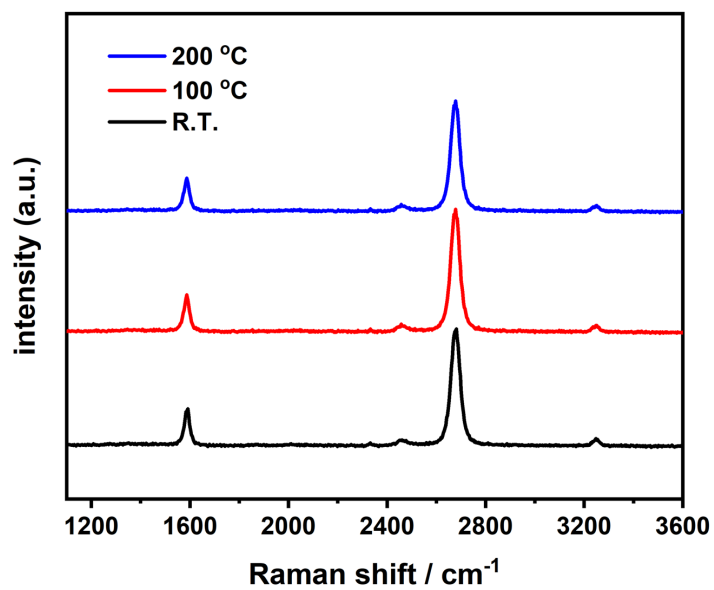

**Figure S1.** Raman spectra of graphene on silicon wafer casted with 10  $\mu\text{L}$  xylenes followed by heating at room temperature (R.T., black), 100  $^{\circ}\text{C}$  (red), or 200  $^{\circ}\text{C}$  (blue) for 10 min.

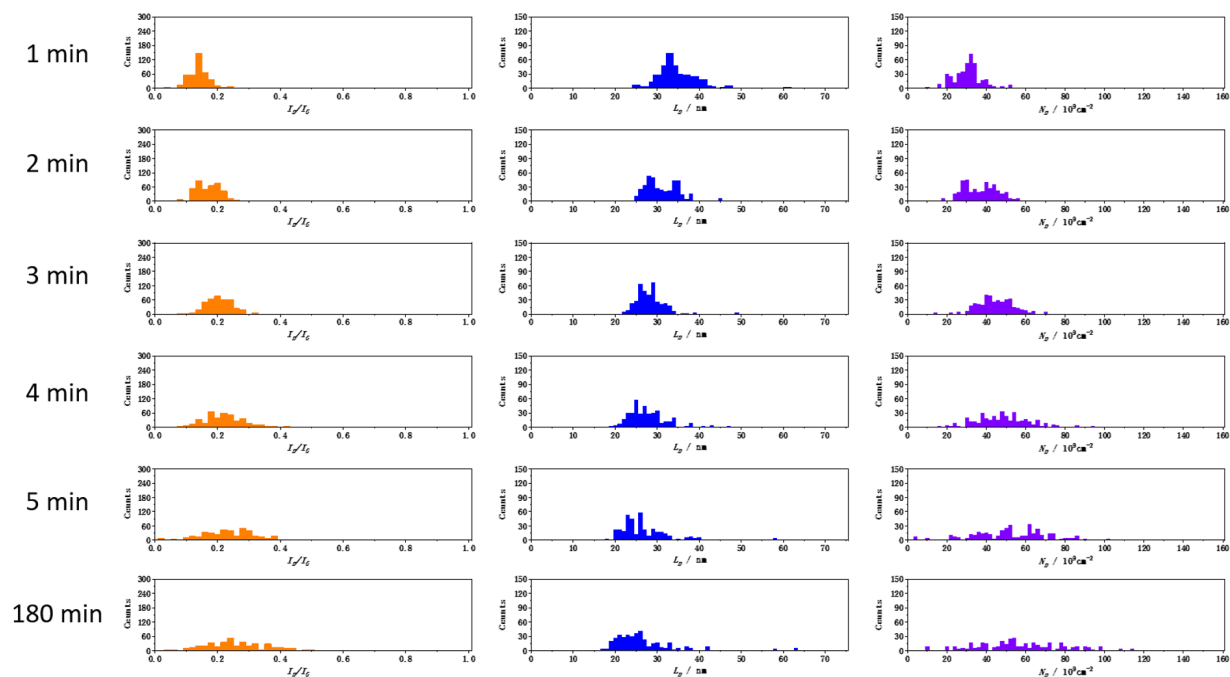

**Figure S2.** Histograms of (A) Raman  $I_D/I_G$  (B)  $L_D$ , and (C)  $n_D$  of G/SiO<sub>2</sub>/Si after reacting with DMBD at 50 °C for different lengths of time. Results were from ~400 data points on 2 sets of independent samples.

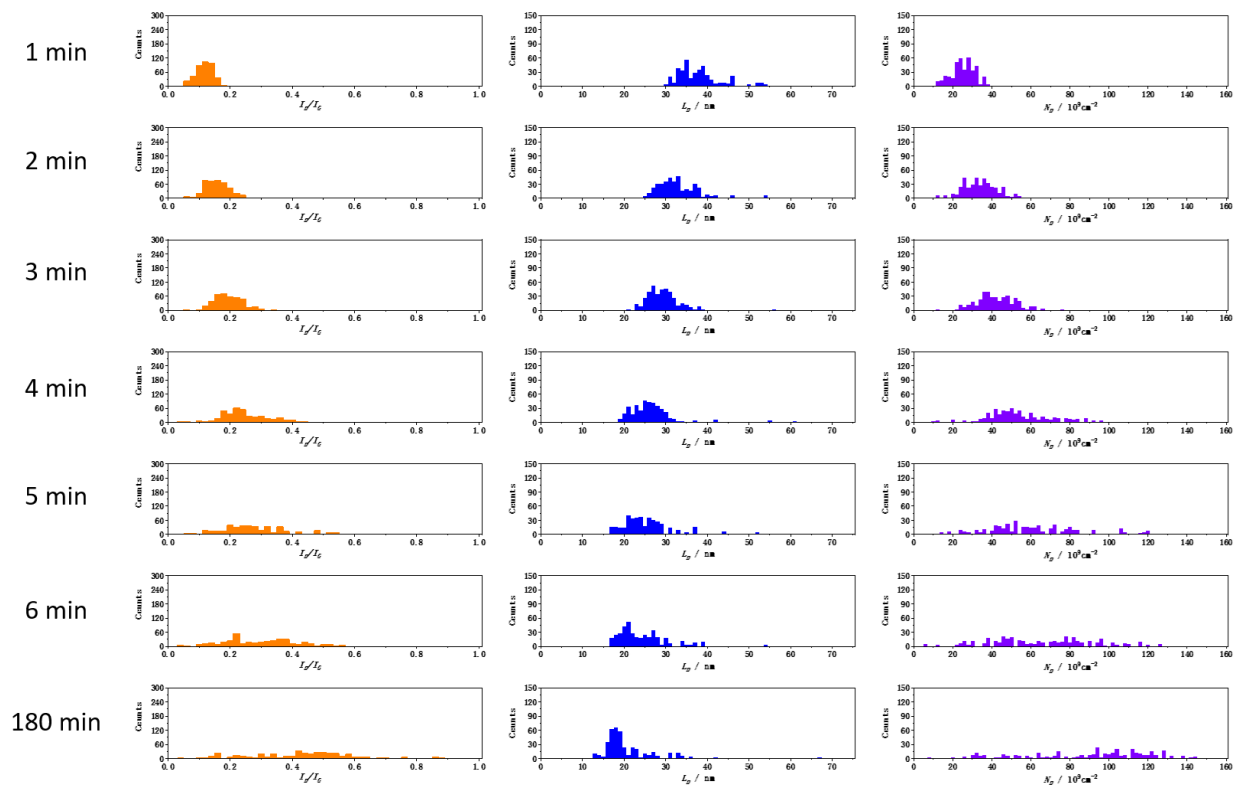

**Figure S3.** Histograms of (A) Raman  $I_D/I_G$  (B)  $L_D$ , and (C)  $n_D$  of G/Cu after reacting with DMBD at 50 °C for different lengths of time. Results were from ~400 data points on 2 sets of independent samples.

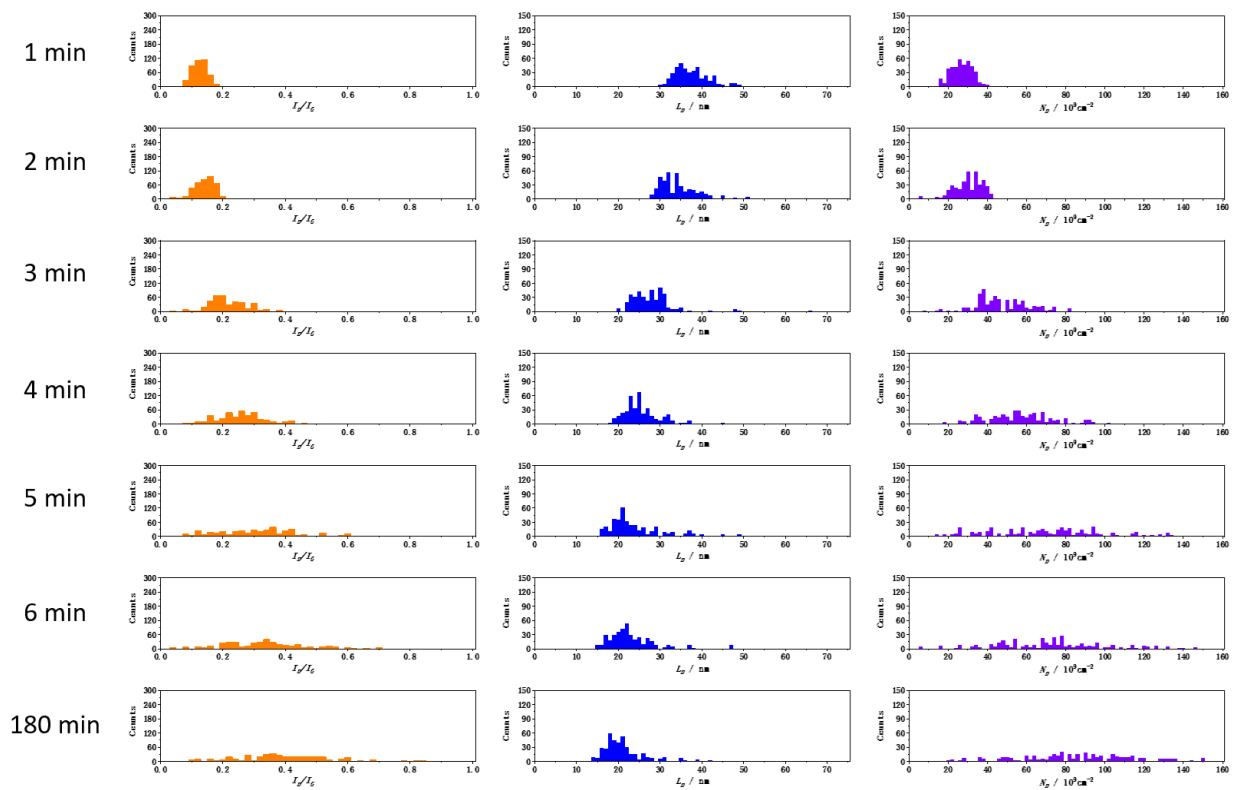

**Figure S4.** Histograms of (A) Raman  $I_D/I_G$  (B)  $L_D$ , and (C)  $n_D$  of G/Ni after reacting with DMBD at 50 °C for different lengths of time. Results were from ~400 data points on 2 sets of independent samples.

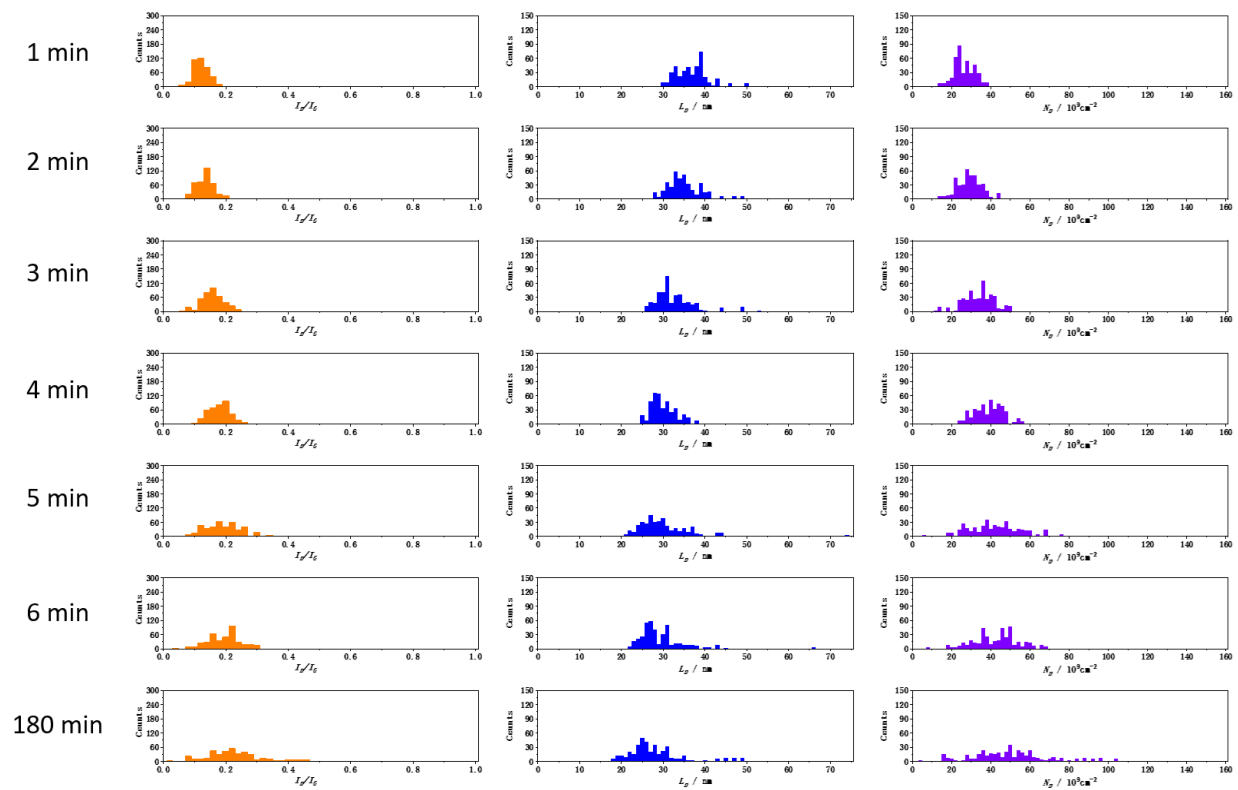

**Figure S5.** Histograms of (A) Raman  $I_D/I_G$  (B)  $L_D$ , and (C)  $n_D$  of G/SiO<sub>2</sub>/Si after reacting with DMBD at 100 °C for different lengths of time. Results were from ~400 data points on 2 sets of independent samples.

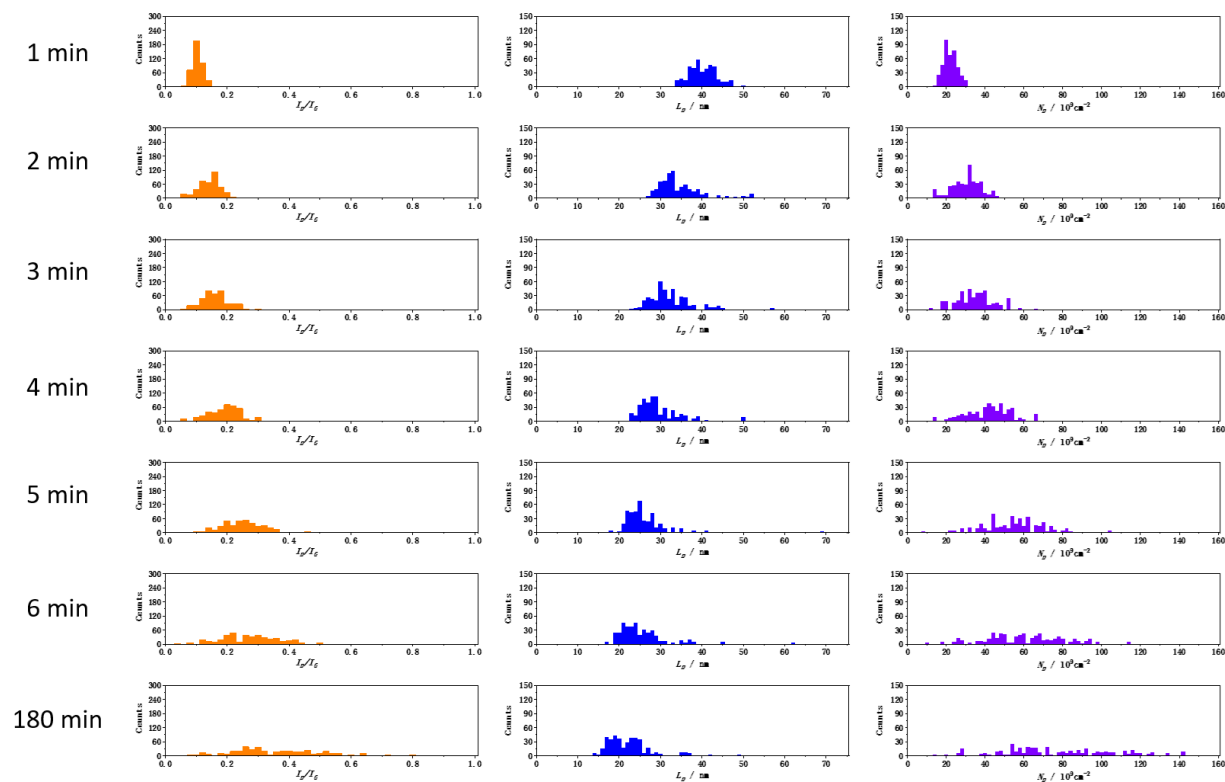

**Figure S6.** Histograms of (A) Raman  $I_D/I_G$  (B)  $L_D$ , and (C)  $n_D$  of G/Cu after reacting with DMBD at 100 °C for different lengths of time. Results were from  $\sim 400$  data points on 2 sets of independent samples.

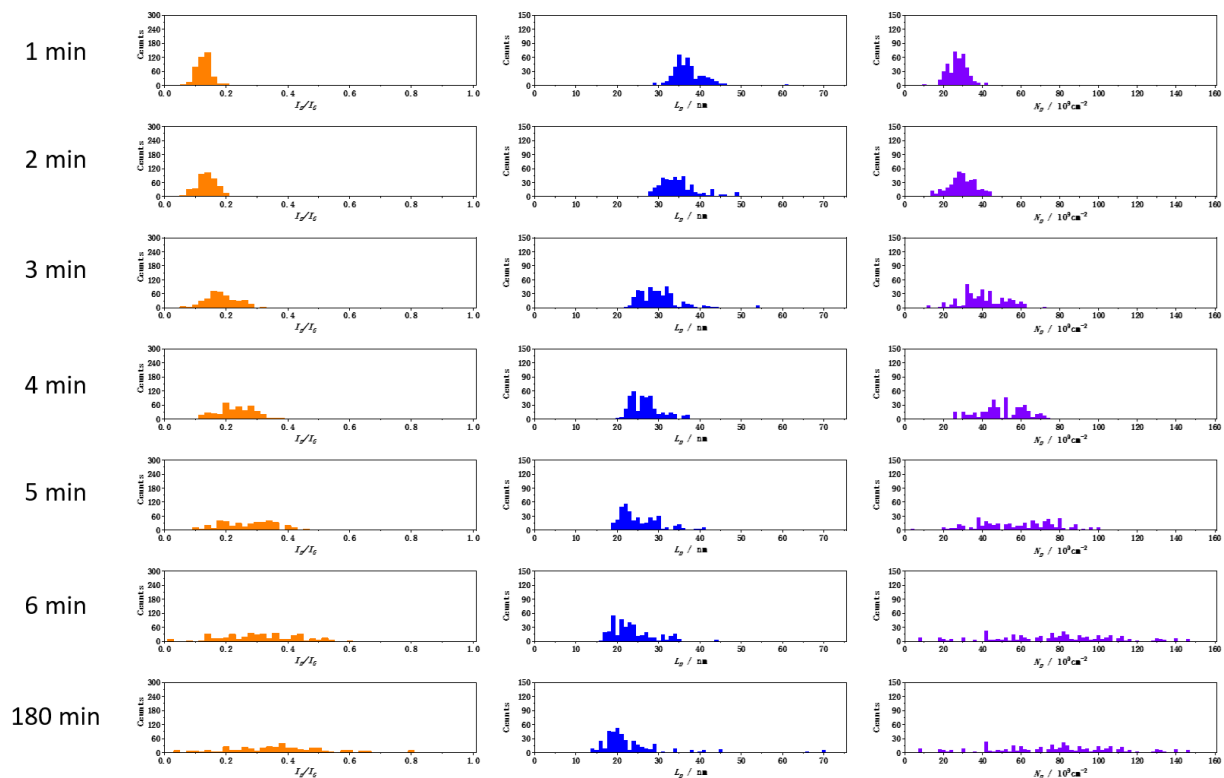

**Figure S7.** Histograms of (A) Raman  $I_D/I_G$  (B)  $L_D$ , and (C)  $n_D$  of G/Ni after reacting with DMBD at 100 °C for different lengths of time. Results were from ~400 data points on 2 sets of independent samples.



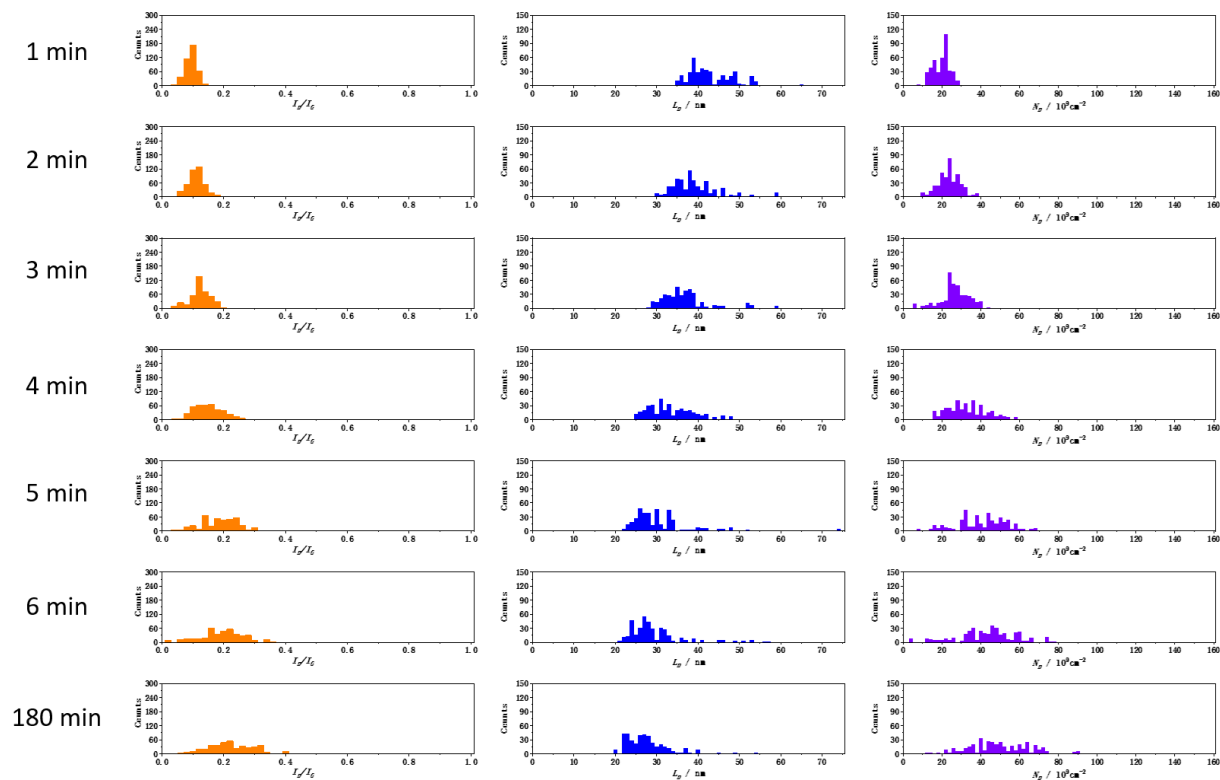

**Figure S8.** Histograms of (A) Raman  $I_D/I_G$  (B)  $L_D$ , and (C)  $n_D$  of G/SiO<sub>2</sub>/Si after reacting with DMBD at 150 °C for different lengths of time. Results were from ~400 data points on 2 sets of independent samples.

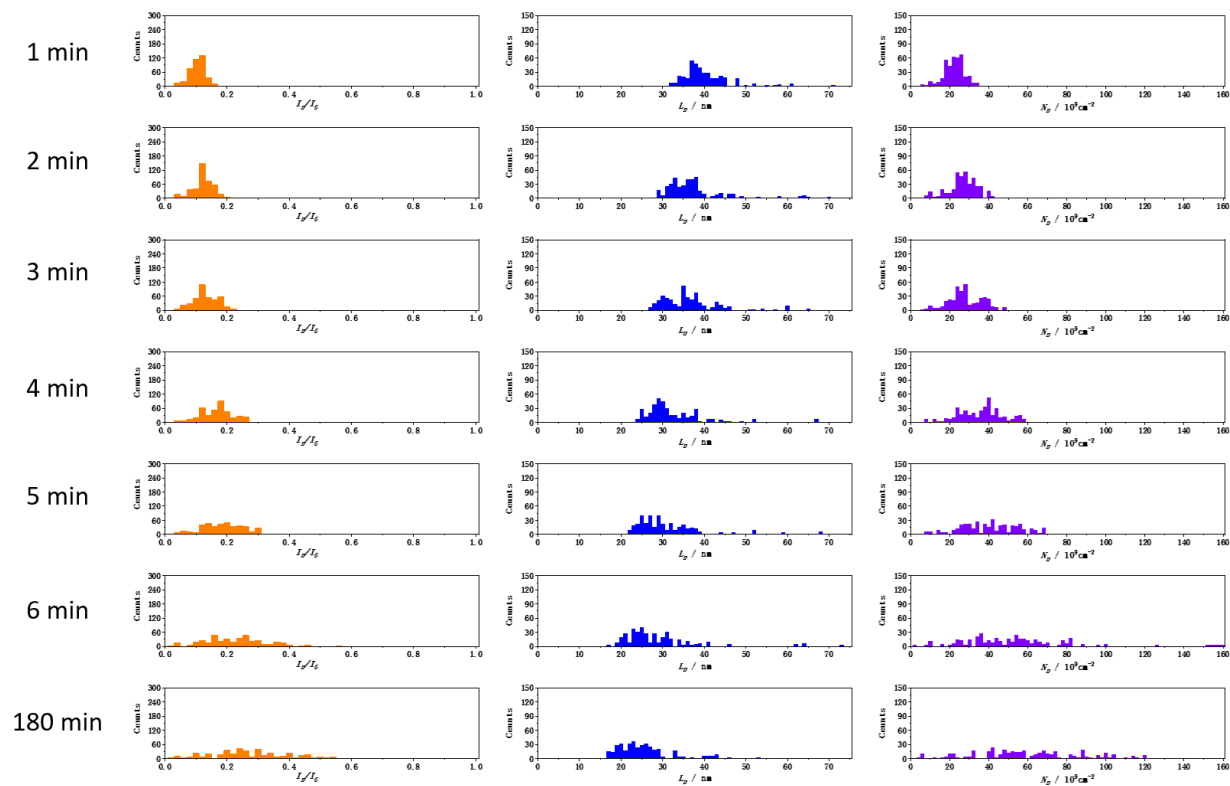

**Figure S9.** Histograms of (A) Raman  $I_D/I_G$  (B)  $L_D$ , and (C)  $n_D$  of G/Cu after reacting with DMBD at 150 °C for different lengths of time. Results were from  $\sim 400$  data points on 2 sets of independent samples.

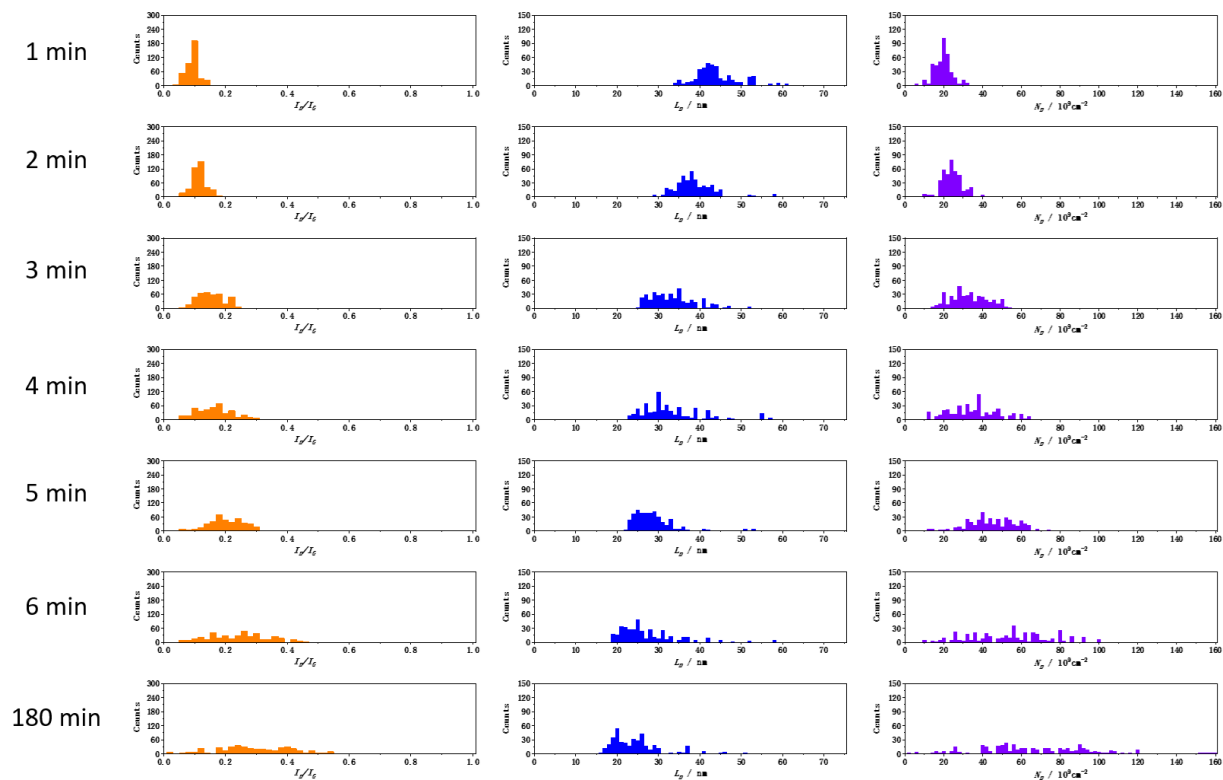

**Figure S10.** Histograms of (A) Raman  $I_D/I_G$  (B)  $L_D$ , and (C)  $n_D$  of G/Ni after reacting with DMBD at 150 °C for different lengths of time. Results were from ~400 data points on 2 sets of independent samples.

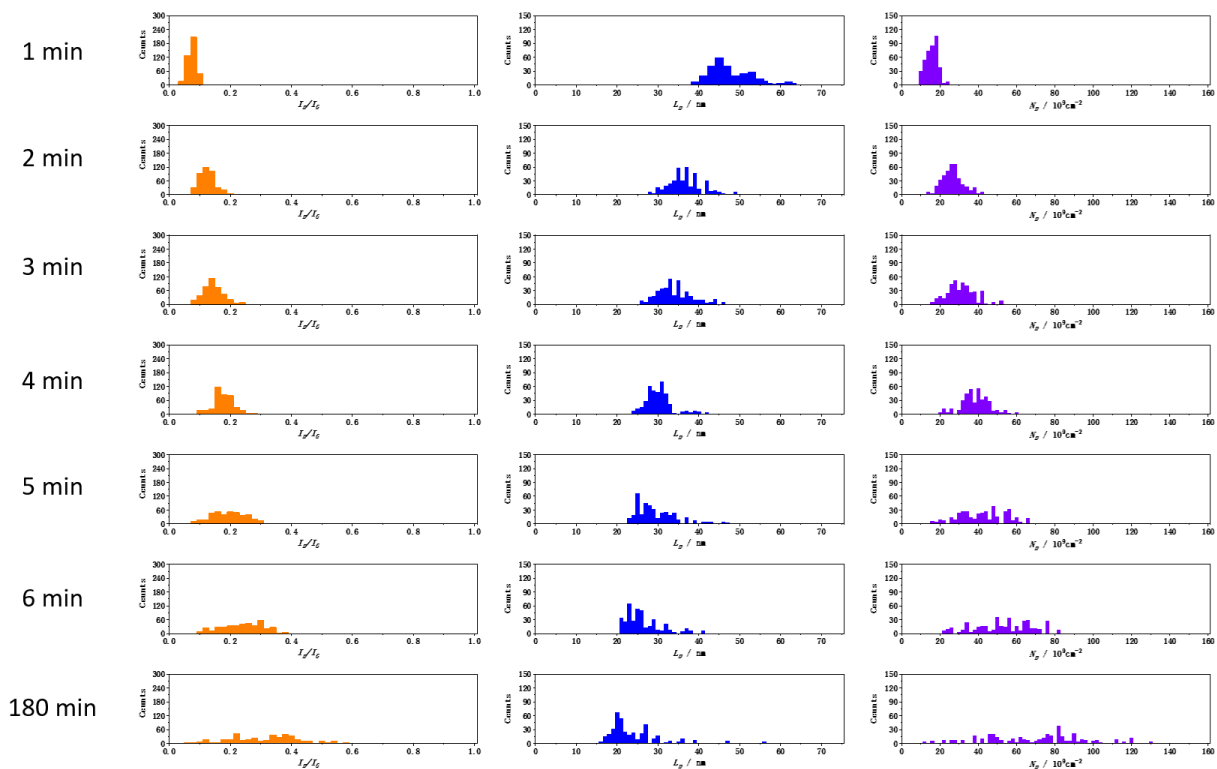

**Figure S11.** Histograms of (A) Raman  $I_D/I_G$  (B)  $L_D$ , and (C)  $n_D$  of G/SiO<sub>2</sub>/Si after reacting with MAH at 50 °C for different lengths of time. Results were from ~400 data points on 2 sets of independent samples.

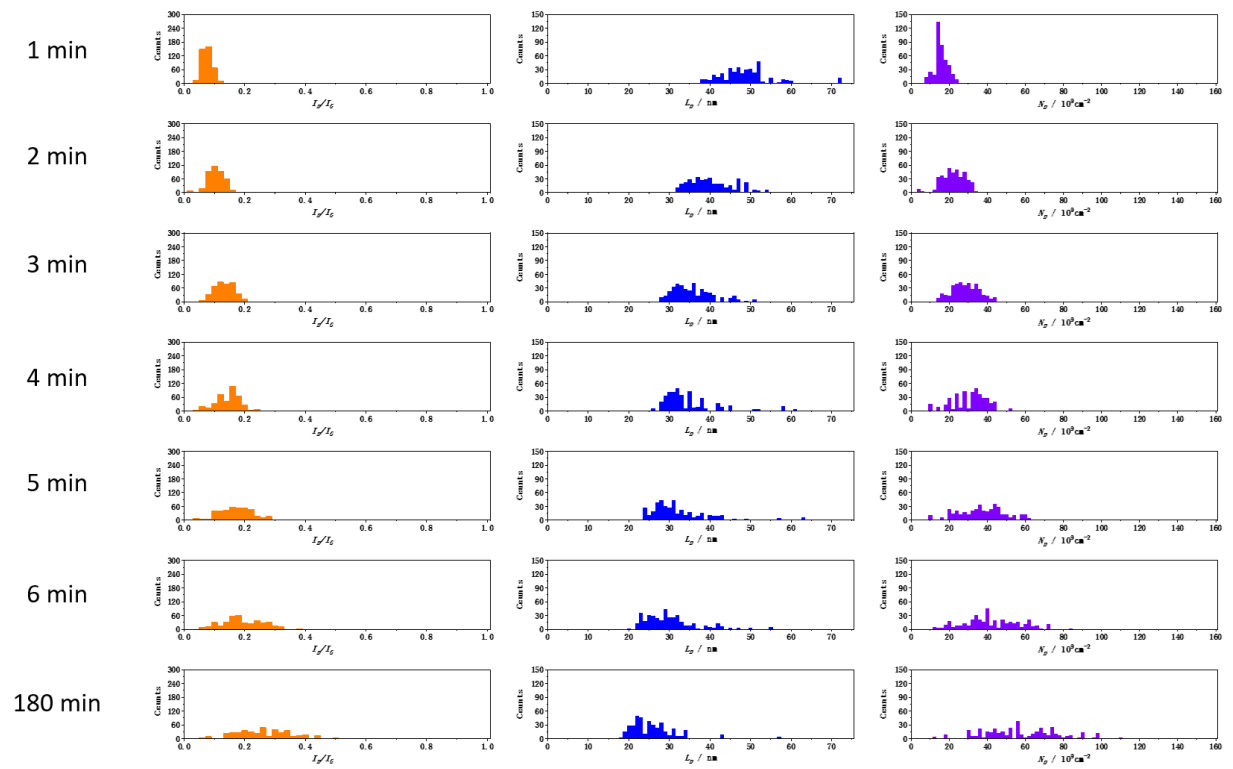

**Figure S12.** Histograms of (A) Raman  $I_D/I_G$  (B)  $L_D$ , and (C)  $n_D$  of G/Cu after reacting with MAH at 50 °C for different lengths of time. Results were from ~400 data points on 2 sets of independent samples.

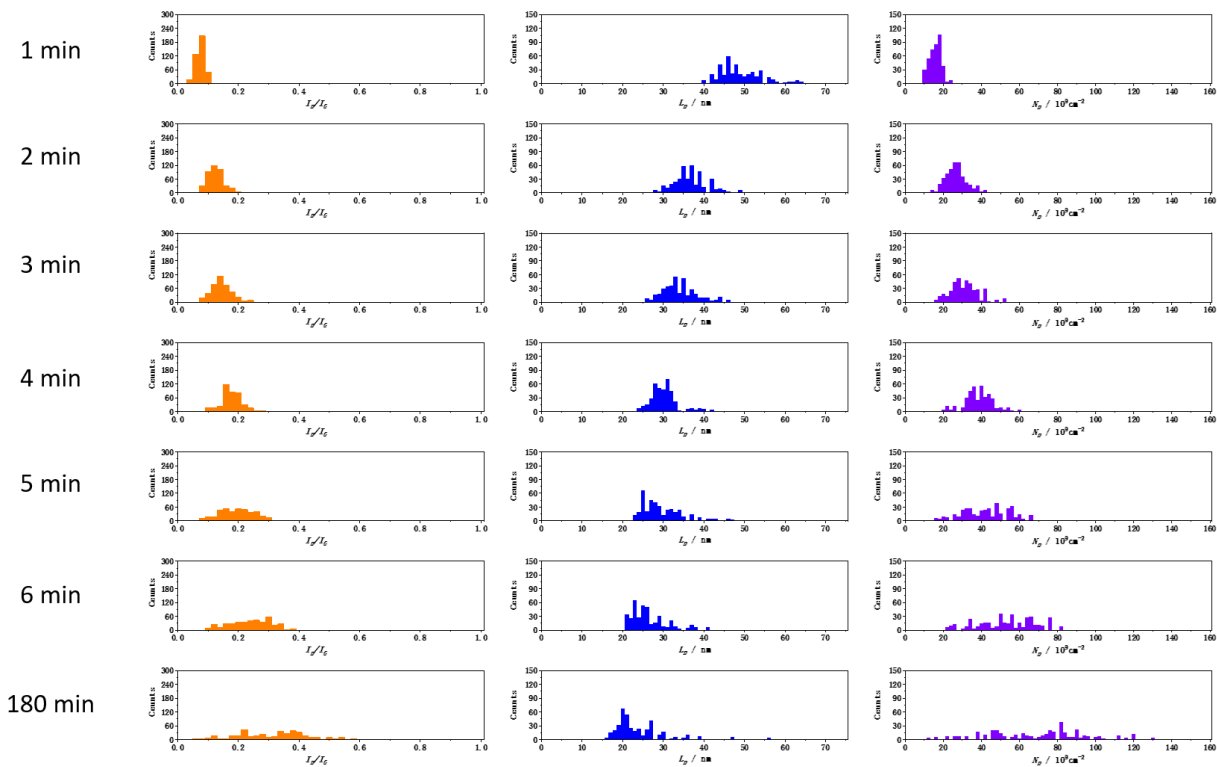

**Figure S13.** Histograms of (A) Raman  $I_D/I_G$  (B)  $L_D$ , and (C)  $n_D$  of G/Ni after reacting with MAH at 50 °C for different lengths of time. Results were from ~400 data points on 2 sets of independent samples.

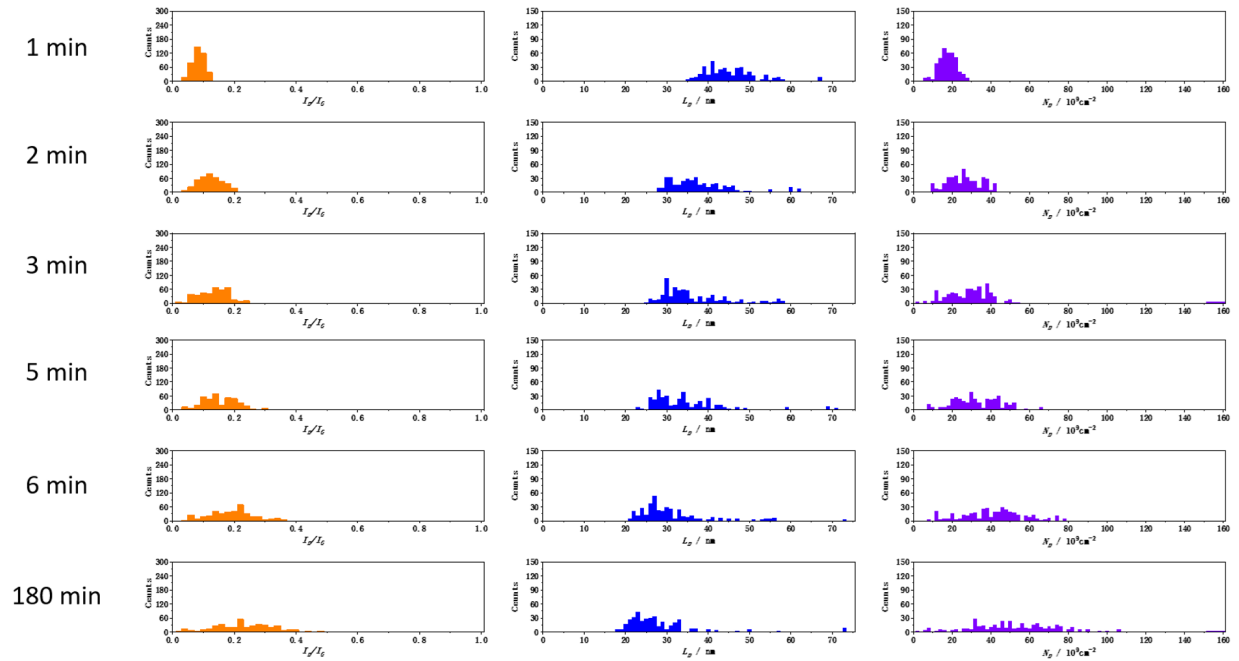

**Figure S14.** Histograms of (A) Raman  $I_D/I_G$  (B)  $L_D$ , and (C)  $n_D$  of G/SiO<sub>2</sub>/Si after reacting with MAH at 100 °C for different lengths of time. Results were from ~400 data points on 2 sets of independent samples.

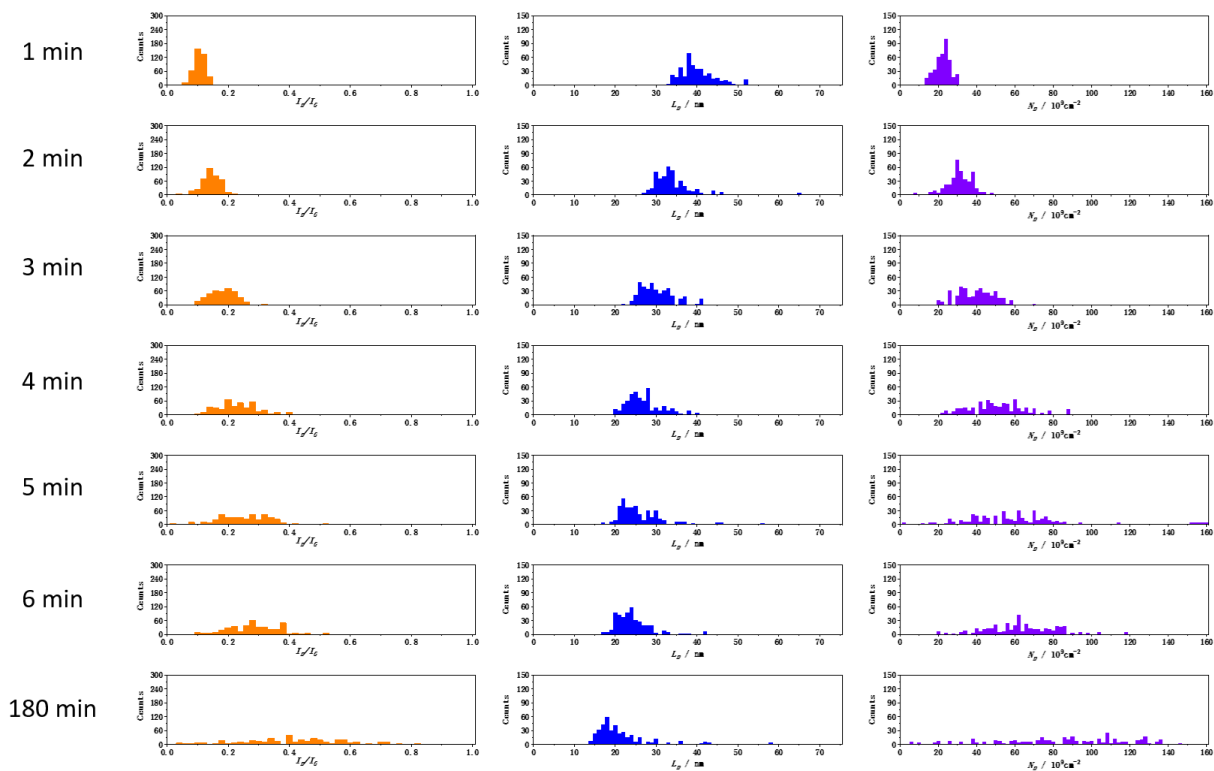

**Figure S15.** Histograms of (A) Raman  $I_D/I_G$  (B)  $L_D$ , and (C)  $n_D$  of G/Cu after reacting with MAH at 100 °C for different lengths of time. Results were from ~400 data points on 2 sets of independent samples.



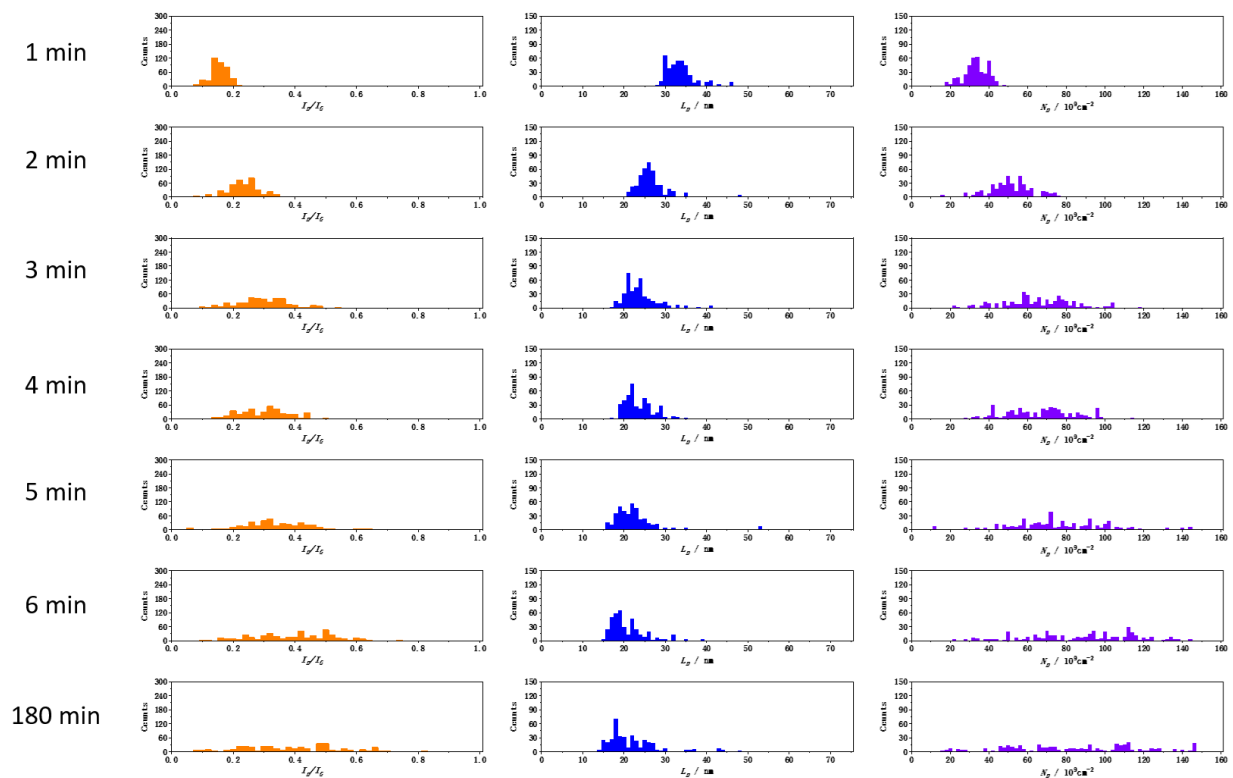

**Figure S16.** Histograms of (A) Raman  $I_D/I_G$  (B)  $L_D$ , and (C)  $n_D$  of G/Ni after reacting with MAH at 100 °C for different lengths of time. Results were from  $\sim 400$  data points on 2 sets of independent samples.

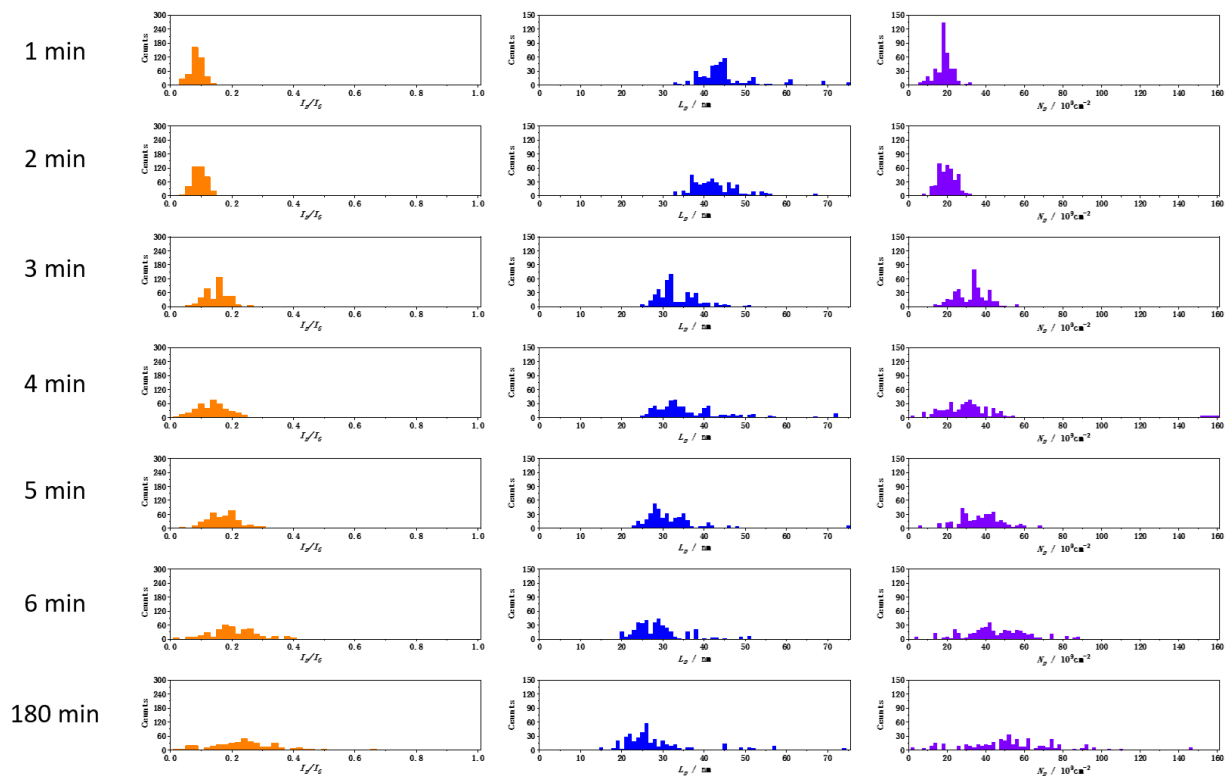

**Figure S17.** Histograms of (A) Raman  $I_D/I_G$  (B)  $L_D$ , and (C)  $n_D$  of G/SiO<sub>2</sub>/Si after reacting with MAH at 150 °C for different lengths of time. Results were from ~400 data points on 2 sets of independent samples.

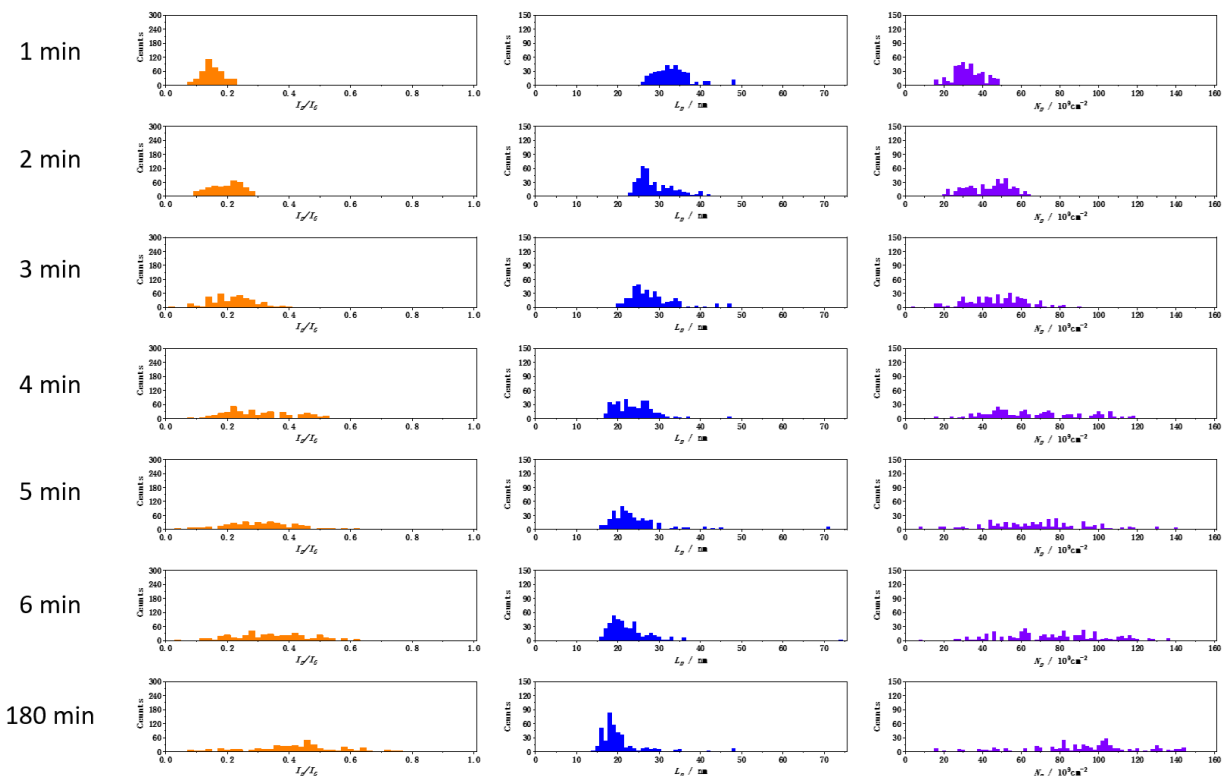

**Figure S18.** Histograms of (A) Raman  $I_D/I_G$  (B)  $L_D$ , and (C)  $n_D$  of G/Cu after reacting with MAH at 150 °C for different lengths of time. Results were from ~400 data points on 2 sets of independent samples.

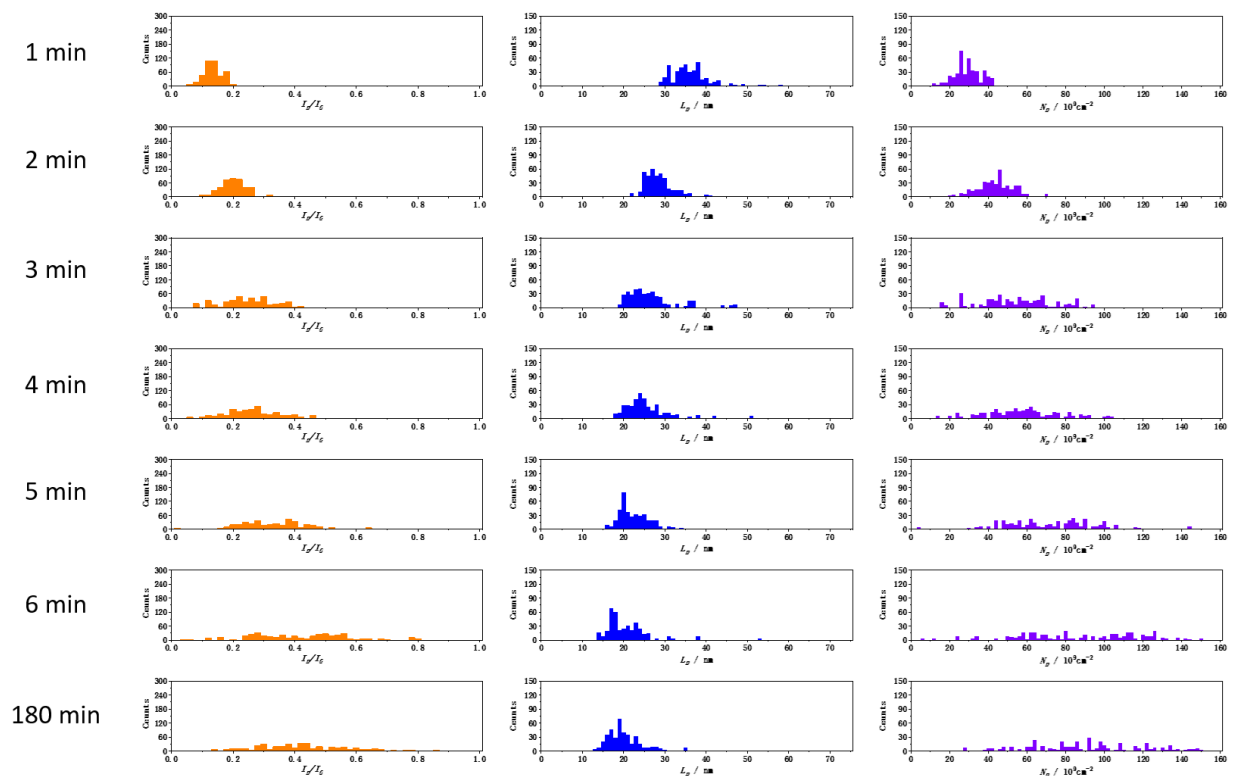

**Figure S19.** Histograms of (A) Raman  $I_D/I_G$  (B)  $L_D$ , and (C)  $n_D$  of G/Ni after reacting with MAH at 150 °C for different lengths of time. Results were from ~400 data points on 2 sets of independent samples.

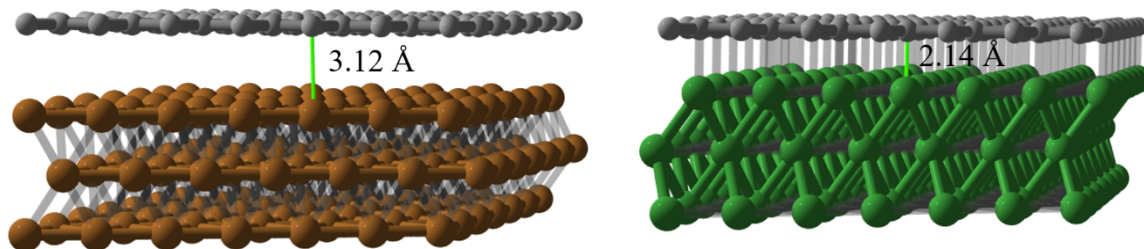

**Figure S20.** The interlayer distance of graphene adsorbed on Cu (111) (left) and Ni (111) (right) surface. The separation distances between the graphene layer and Cu(111)/Ni(111) are 3.12 Å and 2.14 Å, respectively.

**Table S1.** SCF energies (Ry) are given for the optimized geometries at gamma kpoints grid and single point energies of the gamma kpoints geometries at 3x3x1 kpoints. The total and absolute magnetizations are given where relevant.

|               | E (gamma)    | E (3x3x1)    |
|---------------|--------------|--------------|
| MAH           | -149.1515856 | -149.1516406 |
| DMBD          | -151.0272807 | -151.0273226 |
| IS-G          | -1218.400886 | -1218.351684 |
| IS-G/Cu       | -14101.59916 | -14101.59214 |
| IS-G/Ni       | -13844.73961 | -13844.73438 |
| INT-G-MAH     | -1367.588875 | -1367.540684 |
| INT-G-DMBD    | -1369.464752 | -1369.416331 |
| INT-G/Cu-MAH  | -14250.792   | -14250.78504 |
| INT-G/Cu-DMBD | -14252.66804 | -14252.66227 |
| INT-G/Ni-MAH  | -13993.94873 | -13993.94615 |
| INT-G/Ni-DMBD | -13995.81891 | -13995.81532 |
| TS-G-MAH      | N/A          | N/A          |
| TS-G-DMBD     | N/A          | N/A          |
| TS-G/Cu-MAH   | -14250.63611 | -14250.63566 |
| TS-G/Cu-DMBD  | -14252.52043 | -14252.51821 |
| TS-G/Ni-MAH   | -13993.86905 | -13993.87298 |
| TS-G/Ni-DMBD  | -13995.72761 | -13995.72874 |
| FS-G-MAH      | -1367.426527 | -1367.38439  |
| FS-G-DMBD     | -1369.321521 | -1369.279891 |
| FS-G/Cu-MAH   | -14250.63992 | -14250.63934 |
| FS-G/Cu-DMBD  | -14252.53545 | -14252.53339 |
| FS-G/Ni-MAH   | -13993.87884 | -13993.88011 |
| FS-G/Ni-DMBD  | -13995.7625  | -13995.76658 |

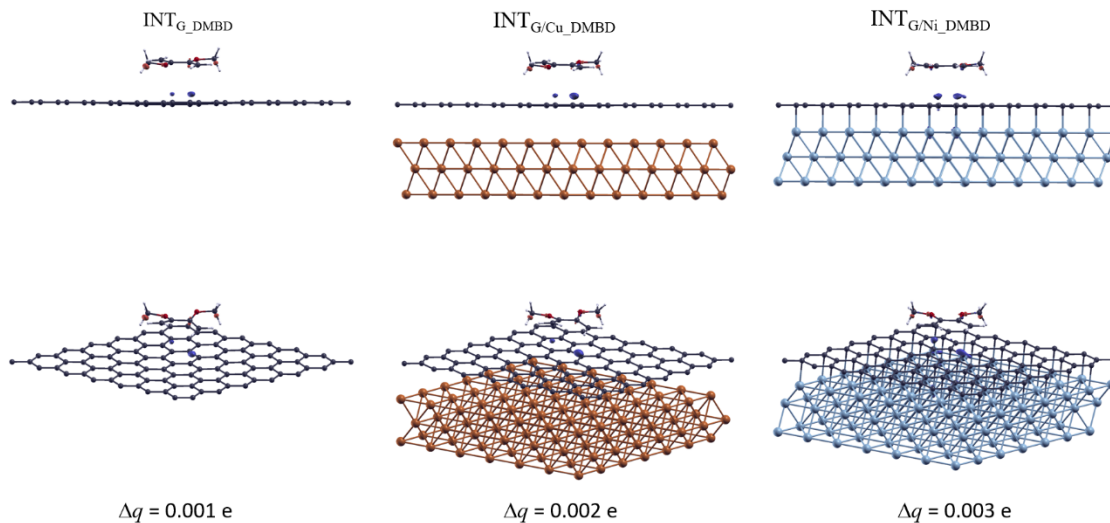

**Figure S21.** Charge density difference plots of  $\text{INT}_G$ ,  $\text{INT}_{G/\text{Cu}}$ , and  $\text{INT}_{G/\text{Ni}}$  for cis-DMBD. Charge transfers ( $\Delta q$ ) are determined from a Bader charge analysis of the electron densities.

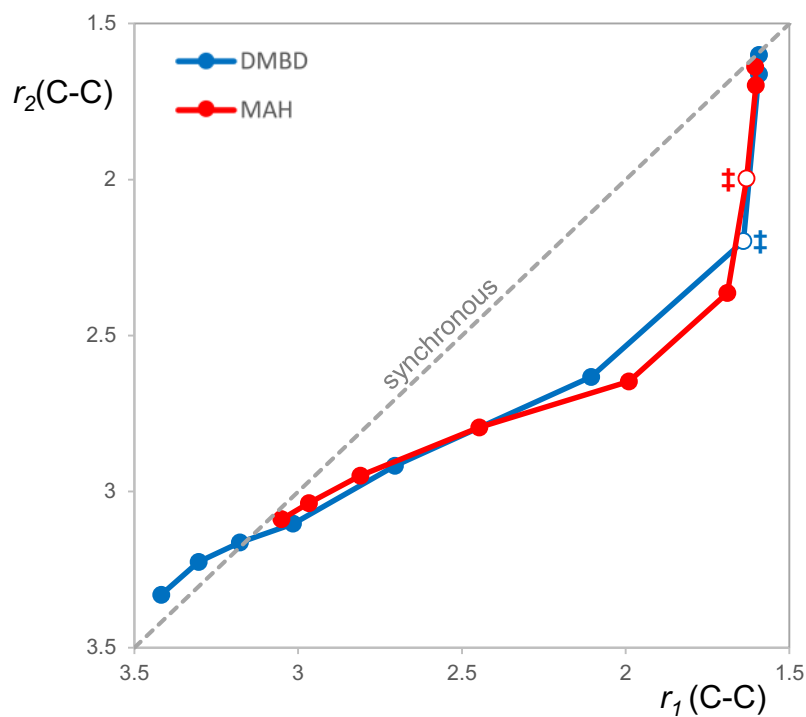

**Figure S22.** Minimum energy paths as determined from NEB calculations of the DA reaction using DMBD (blue) and MAH (red) on G/Ni highlighting asynchronicity of bond formation.  $r_1$  and  $r_2$  are the C-C forming bonds in Å.

**Table S2. Geometry structure for all the optimized compounds and transition states**

|      |              |               |               |   |              |              |              |
|------|--------------|---------------|---------------|---|--------------|--------------|--------------|
| MAH  |              |               |               | C | 3.472344781  | 0.461030032  | 14.031275344 |
| C    | 5.1533953379 | 6.7311102804  | 17.0580636875 | C | 2.240704349  | 1.172171699  | 14.018962074 |
| C    | 5.4377930976 | 8.1867579228  | 16.9444160329 | C | 4.704167228  | 2.594482835  | 14.002054430 |
| C    | 4.2722382127 | 8.8449187068  | 16.9507613462 | C | 3.472531534  | 3.305713589  | 13.984589861 |
| C    | 3.1735182023 | 7.8491639486  | 17.0689074054 | C | 3.472473347  | 4.727969389  | 13.959266517 |
| H    | 6.4517428760 | 8.5718451041  | 16.8702281747 | C | 2.240596262  | 5.439199438  | 13.962184615 |
| H    | 4.0777299428 | 9.9123711696  | 16.8829544248 | C | 2.240558513  | 6.861737238  | 13.955265540 |
| O    | 5.9112140849 | 5.7961820526  | 17.0958479327 | C | 1.008912948  | 7.572813326  | 13.984029971 |
| O    | 1.9819458842 | 8.0151933922  | 17.1177858058 | C | 1.008847208  | 8.995245709  | 13.998245370 |
| O    | 3.7573757737 | 6.5704964979  | 17.1226355100 | C | -0.222663565 | 9.706284050  | 14.033794881 |
| DMBD |              |               |               | C | -0.222583406 | 11.128625050 | 14.049541238 |
| C    | 3.8275432159 | 8.4106297663  | 17.3693066100 | C | -1.454548809 | 11.839900502 | 14.069161842 |
| O    | 4.0753432021 | 9.7114318189  | 17.0317536412 | C | -1.454575989 | 13.262321084 | 14.070143045 |
| C    | 5.0633727525 | 7.5889666626  | 17.2971332979 | C | -2.686382601 | 13.973609845 | 14.065165355 |
| O    | 6.1544677634 | 8.2781435012  | 17.7459965935 | C | 5.935844534  | 0.461092480  | 14.048626789 |
| C    | 5.0691803435 | 6.3262589327  | 16.8310120052 | C | 4.704169445  | 1.172294486  | 14.028807662 |
| H    | 5.9677703139 | 5.7154079365  | 16.8111787037 | C | 7.167768992  | 2.594560206  | 14.026409679 |
| H    | 4.1442015363 | 5.8976323972  | 16.4567194481 | C | 5.936120955  | 3.305779883  | 13.998656642 |
| C    | 2.6290984552 | 7.9042496563  | 17.7166395446 | C | 5.936171524  | 4.728009068  | 13.971382610 |
| H    | 1.7192076584 | 8.4993107074  | 17.7192351482 | C | 4.704462831  | 5.439132328  | 13.947882755 |
| H    | 2.5612012441 | 6.8606131391  | 18.0097199579 | C | 4.704634703  | 6.861574704  | 13.931816324 |
| C    | 2.9513747768 | 10.5890736307 | 17.0581677557 | C | 3.472275436  | 7.573090861  | 13.936367352 |
| C    | 7.4134051690 | 7.6147956763  | 17.6326240980 | C | 3.472434327  | 8.995361956  | 13.945435369 |
| H    | 3.3326589558 | 11.5860052827 | 16.8123755617 | C | 2.240876746  | 9.706469313  | 13.979495157 |
| H    | 2.4892624710 | 10.5986347602 | 18.0588029110 | C | 2.240666909  | 11.128828794 | 14.002886586 |
| H    | 2.1972327663 | 10.2767768898 | 16.3161706835 | C | 1.009147492  | 11.839849495 | 14.036107809 |
| H    | 8.1642163433 | 8.3202636293  | 18.0049331977 | C | 1.009151986  | 13.262099730 | 14.048993590 |
| H    | 7.6234598015 | 7.3591570900  | 16.5805798403 | C | -0.222763694 | 13.973494490 | 14.062642620 |
| H    | 7.4295884629 | 6.6925736461  | 18.2374464328 | C | 8.399498994  | 0.461033836  | 14.057802340 |
| IS-G |              |               |               | C | 7.167692162  | 1.172322091  | 14.046728395 |
| C    | 2.240568617  | 2.594568590   | 14.000698504  | C | 9.631389396  | 2.594674906  | 14.052635883 |
| C    | 1.008943960  | 3.305677995   | 14.002338540  | C | 8.399490936  | 3.306006324  | 14.033518178 |
| C    | 1.008880577  | 4.728130112   | 13.988631831  | C | 8.399634833  | 4.728168119  | 14.017329188 |
| C    | -0.222849499 | 5.439168061   | 14.008153761  | C | 7.168103783  | 5.439180236  | 13.981863159 |
| C    | -0.222806139 | 6.861706411   | 14.008650539  | C | 7.168057048  | 6.861784943  | 13.964369611 |
| C    | -1.454546278 | 7.572698741   | 14.036015377  | C | 5.936359735  | 7.572887671  | 13.936447610 |
| C    | -1.454308213 | 8.995151699   | 14.046906239  | C | 5.936544596  | 8.995212904  | 13.936914104 |
| C    | -2.686317701 | 9.706311656   | 14.064149872  | C | 4.704107791  | 9.706760986  | 13.941156322 |
| C    | -2.686330244 | 11.128722685  | 14.071383143  | C | 4.704310894  | 11.129063441 | 13.965736105 |
| C    | -3.918213645 | 11.839913825  | 14.067408290  | C | 3.472659696  | 11.839977675 | 13.994029819 |
| C    | -3.918211936 | 13.262359463  | 14.062190818  | C | 3.472625140  | 13.262303831 | 14.019596656 |
| C    | -5.149929709 | 13.973542681  | 14.045454614  | C | 2.240814331  | 13.973535980 | 14.041312746 |

C 10.863163366 0.460975392 14.052408116  
C 9.631244390 1.172261028 14.056322507  
C 12.095029257 2.594658541 14.060992566  
C 10.863166145 3.305912263 14.059550081  
C 10.863240705 4.728190030 14.055800622  
C 9.631340546 5.439497851 14.033950587  
C 9.631437438 6.861811922 14.022574418  
C 8.399958807 7.572850477 13.988655349  
C 8.399831429 8.995385914 13.983975091  
C 7.168225927 9.706588988 13.959368864  
C 7.168063499 11.128953591 13.975191871  
C 5.936180172 11.840116125 13.977642560  
C 5.936161472 13.262433885 14.004767685  
C 4.704480467 13.973631712 14.020894804  
C 13.326744893 0.461018561 14.039667423  
C 12.094914661 1.172231387 14.052387662  
C 14.558665367 2.594778355 14.046904347  
C 13.326864126 3.305887732 14.058929208  
C 13.326956155 4.728279775 14.060796922  
C 12.095036439 5.439464995 14.061342797  
C 12.095077123 6.861820193 14.057075868  
C 10.863068797 7.572966300 14.041106987  
C 10.863359765 8.995403774 14.037228470  
C 9.631507576 9.706517215 14.013257372  
C 9.631596234 11.129027516 14.016768713  
C 8.399801262 11.840061613 14.001455982  
C 8.399763331 13.262579916 14.014546009  
C 7.168076723 13.973684434 14.016047641  
C 15.790271695 0.461233807 14.028475952  
C 14.558519375 1.172357346 14.039153733  
C -0.222952761 2.594581500 14.021572807  
C -1.454646590 3.305642897 14.034187815  
C -1.454567681 4.728046444 14.032181052  
C -2.686329732 5.439140786 14.049409302  
C -2.686280832 6.861563534 14.050527439  
C -3.918209505 7.572668245 14.059324136  
C -3.918123294 8.995084698 14.062047391  
C -5.150085032 9.706239493 14.054377852  
C -5.149997535 11.128652389 14.054762434  
C -6.381836961 11.839812455 14.037801511  
C -6.381699071 13.262244322 14.036509839  
C -7.613423247 13.973390479 14.025900610  
C 1.008721872 0.461019023 14.023975829  
C -0.222879832 1.172084644 14.025378779

IS-G/Cu  
Cu 1.020342336 3.316994543 10.967757419  
Cu 2.263706581 2.597564856 8.862672619  
Cu 1.022353907 1.878258214 6.750759000  
Cu -0.223078000 5.471174833 10.968071443  
Cu 1.019753011 4.751688782 8.861864160  
Cu -0.220993025 4.032343424 6.750759000  
Cu -1.466051223 7.625476067 10.969676361  
Cu -0.223693963 6.905517597 8.862077884  
Cu -1.464339957 6.186428635 6.750759000  
Cu -2.708393616 9.779834801 10.971367073  
Cu -1.466269916 9.059580250 8.863570706  
Cu -2.707686890 8.340513845 6.750759000  
Cu -3.952287989 11.933319152 10.972596367  
Cu -2.708971785 11.213688768 8.864729887  
Cu -3.951033822 10.494599055 6.750759000  
Cu -5.196116467 14.087026837 10.972036649  
Cu -3.951976474 13.367719798 8.864821054  
Cu -5.194380755 12.648684265 6.750759000  
Cu 2.263617423 1.162436745 10.969758151  
Cu 3.507807535 0.443450013 8.863849455  
Cu -6.437727687 14.802769475 6.750759000  
Cu 3.507612821 3.317162260 10.965653416  
Cu 4.751931280 2.597653799 8.861805549  
Cu 3.509333670 1.878423274 6.750759000  
Cu 2.263982637 5.471872878 10.963061576  
Cu 3.507942387 4.751349646 8.859882939  
Cu 2.265986738 4.032508485 6.750759000  
Cu 1.020641921 7.626130158 10.963592913  
Cu 2.264127993 6.905785256 8.858914086  
Cu 1.022639805 6.186593695 6.750759000  
Cu -0.221957385 9.780255530 10.968025960  
Cu 1.020505149 9.060481392 8.860369896  
Cu -0.220707127 8.340678905 6.750759000  
Cu -1.464812332 11.933758355 10.971464841  
Cu -0.222553063 11.214725564 8.862598238  
Cu -1.464054060 10.494764115 6.750759000  
Cu -2.708306289 14.086930100 10.971404362  
Cu -1.464988800 13.368331709 8.864127955  
Cu -2.707400992 12.648849325 6.750759000  
Cu 4.751221111 1.162523241 10.969135974  
Cu 5.995516242 0.443661944 8.863596140  
Cu -3.950747924 14.802934535 6.750759000  
Cu 5.994714105 3.317637399 10.965146630



|                 |              |              |                 |              |              |
|-----------------|--------------|--------------|-----------------|--------------|--------------|
| Cu 7.240128141  | 2.598323354  | 8.862740452  | Cu 9.726193301  | 5.471940923  | 10.968217768 |
| Cu 5.996313433  | 1.878588335  | 6.750759000  | Cu 10.970742870 | 4.752589603  | 8.863593615  |
| Cu 4.751099978  | 5.472457204  | 10.960933040 | Cu 9.726926026  | 4.033003665  | 6.750759000  |
| Cu 5.996597534  | 4.752297407  | 8.860471063  | Cu 8.482657364  | 7.626794957  | 10.966049451 |
| Cu 4.752966500  | 4.032673545  | 6.750759000  | Cu 9.727704780  | 6.906384369  | 8.862635971  |
| Cu 3.507621095  | 7.626521638  | 10.960567712 | Cu 8.483579093  | 6.187088876  | 6.750759000  |
| Cu 4.752488536  | 6.906311061  | 8.858493265  | Cu 7.238836715  | 9.781429131  | 10.965266496 |
| Cu 3.509619568  | 6.186758755  | 6.750759000  | Cu 8.483868737  | 9.060812772  | 8.861950730  |
| Cu 2.264218919  | 9.781091330  | 10.963157384 | Cu 7.240232161  | 8.341174086  | 6.750759000  |
| Cu 3.508665838  | 9.061108073  | 8.860926529  | Cu 5.995126977  | 11.935597437 | 10.966790080 |
| Cu 2.266272635  | 8.340843965  | 6.750759000  | Cu 7.240219438  | 11.215974436 | 8.862008454  |
| Cu 1.021916387  | 11.934122552 | 10.967770144 | Cu 5.996885228  | 10.495259296 | 6.750759000  |
| Cu 2.265038599  | 11.215757133 | 8.861523265  | Cu 4.751983556  | 14.088798411 | 10.970102298 |
| Cu 1.022925703  | 10.494929175 | 6.750759000  | Cu 5.996055078  | 13.370485722 | 8.862548134  |
| Cu -0.220962279 | 14.087030522 | 10.970414788 | Cu 4.753538296  | 12.649344506 | 6.750759000  |
| Cu 1.022162652  | 13.369597479 | 8.863264677  | Cu 12.212416805 | 1.163362982  | 10.971310297 |
| Cu -0.220421229 | 12.649014386 | 6.750759000  | Cu 13.455996498 | 0.445883284  | 8.863606871  |
| Cu 7.238777505  | 1.162638641  | 10.969298691 | Cu 3.510191364  | 14.803429716 | 6.750759000  |
| Cu 8.482920556  | 0.444411767  | 8.863973628  | Cu 13.455759374 | 3.317430286  | 10.972112405 |
| Cu -1.463768162 | 14.803099596 | 6.750759000  | Cu 14.698996862 | 2.599207671  | 8.864559254  |
| Cu 8.482385138  | 3.317418396  | 10.967463375 | Cu 13.457252721 | 1.879083515  | 6.750759000  |
| Cu 9.727232189  | 2.598703713  | 8.863498661  | Cu 12.212602344 | 5.471949429  | 10.971551179 |
| Cu 8.483293195  | 1.878753395  | 6.750759000  | Cu 13.456044663 | 4.752949851  | 8.864727527  |
| Cu 7.239001618  | 5.472278782  | 10.963842977 | Cu 12.213905788 | 4.033168726  | 6.750759000  |
| Cu 8.484478023  | 4.752418640  | 8.861937868  | Cu 10.969342930 | 7.626577449  | 10.970682851 |
| Cu 7.239946263  | 4.032838605  | 6.750759000  | Cu 12.213496963 | 6.906618196  | 8.864546239  |
| Cu 5.995238957  | 7.627048678  | 10.960667442 | Cu 10.970558856 | 6.187253936  | 6.750759000  |
| Cu 7.240779498  | 6.906377020  | 8.860196857  | Cu 9.725486623  | 9.780858794  | 10.969696728 |
| Cu 5.996599330  | 6.186923815  | 6.750759000  | Cu 10.970474315 | 9.060544489  | 8.864175023  |
| Cu 4.751809962  | 9.781754876  | 10.960577190 | Cu 9.727211923  | 8.341339146  | 6.750759000  |
| Cu 5.996979110  | 9.061249404  | 8.859440160  | Cu 8.481804580  | 11.934832985 | 10.969830075 |
| Cu 4.753252398  | 8.341009025  | 6.750759000  | Cu 9.726930321  | 11.215112734 | 8.863987684  |
| Cu 3.508560248  | 11.935542420 | 10.965795999 | Cu 8.483864991  | 10.495424356 | 6.750759000  |
| Cu 4.752829836  | 11.216416470 | 8.860622372  | Cu 7.238130118  | 14.088264074 | 10.970718543 |
| Cu 3.509905466  | 10.495094236 | 6.750759000  | Cu 8.483205847  | 13.369712087 | 8.864090993  |
| Cu 2.265682663  | 14.088210967 | 10.970080735 | Cu 7.240518059  | 12.649509566 | 6.750759000  |
| Cu 3.509039806  | 13.370666446 | 8.862520768  | Cu 14.698620930 | 1.163301775  | 10.971862332 |
| Cu 2.266558533  | 12.649179446 | 6.750759000  | Cu 15.942651772 | 0.445289494  | 8.864248120  |
| Cu 9.725935202  | 1.162672195  | 10.970131967 | Cu 5.997171126  | 14.803594776 | 6.750759000  |
| Cu 10.969725294 | 0.445520362  | 8.863724658  | Cu -1.466441956 | 3.316293260  | 10.970824643 |
| Cu 1.023211601  | 14.803264656 | 6.750759000  | Cu -0.223410128 | 2.597698430  | 8.863763333  |
| Cu 10.969210197 | 3.317218514  | 10.970936987 | Cu 15.944232483 | 1.879248576  | 6.750759000  |
| Cu 12.213147718 | 2.599445277  | 8.864217733  | Cu -2.709664330 | 5.470829311  | 10.970755784 |
| Cu 10.970272958 | 1.878918455  | 6.750759000  | Cu -1.467043207 | 4.751596409  | 8.863704662  |

|    |              |              |              |   |              |              |              |
|----|--------------|--------------|--------------|---|--------------|--------------|--------------|
| Cu | 14.700885551 | 4.033333786  | 6.750759000  | C | 7.167313338  | 2.682913943  | 14.068362736 |
| Cu | -3.952744464 | 7.625714894  | 10.971701546 | C | 5.923779996  | 3.400902891  | 14.060065604 |
| Cu | -2.709945713 | 6.905596589  | 8.864299363  | C | 5.924035708  | 4.837041268  | 14.049236072 |
| Cu | 13.457538618 | 6.187418996  | 6.750759000  | C | 4.680398900  | 5.555300425  | 14.043415127 |
| Cu | -5.196106193 | 9.779728641  | 10.972684342 | C | 4.680404514  | 6.991582402  | 14.038681870 |
| Cu | -3.952333600 | 9.059587996  | 8.864838694  | C | 3.436769551  | 7.709765437  | 14.040460201 |
| Cu | 12.214191686 | 8.341504206  | 6.750759000  | C | 3.436794705  | 9.146181148  | 14.043893805 |
| Cu | -6.440029345 | 11.933278074 | 10.972469950 | C | 2.193183264  | 9.864259898  | 14.052202124 |
| Cu | -5.195446600 | 11.213489789 | 8.865332699  | C | 2.193451274  | 11.300410019 | 14.061737604 |
| Cu | 10.970844754 | 10.495589416 | 6.750759000  | C | 0.949911118  | 12.018176950 | 14.075129391 |
| Cu | -7.683715926 | 14.086819225 | 10.971527979 | C | 0.950242439  | 13.454166895 | 14.082438941 |
| Cu | -6.438734387 | 13.367941278 | 8.864796561  | C | -0.293197989 | 14.171717590 | 14.087339171 |
| Cu | 9.727497821  | 12.649674627 | 6.750759000  | C | 8.410449184  | 0.529164330  | 14.083775062 |
| Cu | -0.223491734 | 1.162042868  | 10.971200074 | C | 7.167051234  | 1.246793463  | 14.078750416 |
| Cu | 1.020597386  | 0.443594769  | 8.864380194  | C | 9.654316524  | 2.683283760  | 14.079986096 |
| Cu | 8.484150889  | 14.803759837 | 6.750759000  | C | 8.411077174  | 3.401185747  | 14.070578906 |
| C  | 2.192643704  | 2.682637768  | 14.071172695 | C | 8.411257070  | 4.837301548  | 14.064342342 |
| C  | 0.949028396  | 3.400772919  | 14.073617198 | C | 7.167836124  | 5.555500451  | 14.051742715 |
| C  | 0.949092311  | 4.836937806  | 14.063219894 | C | 7.167936588  | 6.991683340  | 14.047841850 |
| C  | -0.294494949 | 5.555132060  | 14.071611323 | C | 5.924345795  | 7.709914216  | 14.042322269 |
| C  | -0.294311148 | 6.991351901  | 14.067549782 | C | 5.924195770  | 9.146248081  | 14.048101459 |
| C  | -1.537784885 | 7.709332495  | 14.078952550 | C | 4.680714476  | 9.864271592  | 14.048917290 |
| C  | -1.537557363 | 9.145522090  | 14.080837547 | C | 4.680644395  | 11.300454996 | 14.058772257 |
| C  | -2.780802720 | 9.863368459  | 14.090227779 | C | 3.437190611  | 12.018511806 | 14.064627089 |
| C  | -2.780722202 | 11.299467987 | 14.090887523 | C | 3.437391283  | 13.454424413 | 14.076987017 |
| C  | -4.023968971 | 12.017258398 | 14.093773955 | C | 2.193956754  | 14.172217210 | 14.083136658 |
| C  | -4.023933290 | 13.453245221 | 14.091510769 | C | 10.897544530 | 0.529540150  | 14.087039136 |
| C  | -5.267318748 | 14.171145816 | 14.091067225 | C | 9.654239454  | 1.247201268  | 14.084311786 |
| C  | 3.436138857  | 0.528543699  | 14.083791396 | C | 12.141034060 | 2.683475629  | 14.088879960 |
| C  | 2.192605865  | 1.246542032  | 14.082478933 | C | 10.897929881 | 3.401471170  | 14.084833952 |
| C  | 4.679984375  | 2.682696296  | 14.064894610 | C | 10.897815452 | 4.837577176  | 14.082957371 |
| C  | 3.436312949  | 3.400812612  | 14.060021313 | C | 9.654746098  | 5.555753200  | 14.074095739 |
| C  | 3.436485859  | 4.837034823  | 14.048051527 | C | 9.654733387  | 6.991912771  | 14.072521626 |
| C  | 2.192731536  | 5.555241084  | 14.050003563 | C | 8.411398450  | 7.710133218  | 14.060397928 |
| C  | 2.192885271  | 6.991594572  | 14.045815974 | C | 8.411373205  | 9.146348699  | 14.065204960 |
| C  | 0.949212536  | 7.709680071  | 14.056201914 | C | 7.167851914  | 9.864355963  | 14.059760114 |
| C  | 0.949553263  | 9.145987241  | 14.058365088 | C | 7.167807080  | 11.300517098 | 14.068828610 |
| C  | -0.294036512 | 9.863786515  | 14.073172579 | C | 5.924341470  | 12.018415560 | 14.068517786 |
| C  | -0.293676126 | 11.299931968 | 14.079015136 | C | 5.924338106  | 13.454354018 | 14.079779219 |
| C  | -1.537105094 | 12.017537811 | 14.088261510 | C | 4.680974253  | 14.172324933 | 14.083186457 |
| C  | -1.536900086 | 13.453614571 | 14.089258839 | C | 13.384406458 | 0.529587756  | 14.089049703 |
| C  | -2.780318584 | 14.171247624 | 14.089715538 | C | 12.141117747 | 1.247497520  | 14.089580099 |
| C  | 5.923297846  | 0.528729996  | 14.082544469 | C | 14.627665139 | 2.683550172  | 14.089626117 |
| C  | 4.679752657  | 1.246565549  | 14.078165153 | C | 13.384438925 | 3.401656691  | 14.089693974 |

|         |              |              |              |    |              |              |              |
|---------|--------------|--------------|--------------|----|--------------|--------------|--------------|
| C       | 13.384245827 | 4.837692840  | 14.088661406 | Ni | -6.253792938 | 12.089223743 | 10.000000000 |
| C       | 12.141249609 | 5.555902017  | 14.087099417 | Ni | -6.254527033 | 13.516166146 | 13.960272856 |
| C       | 12.141052276 | 6.992069725  | 14.087694321 | Ni | -6.254323257 | 14.943430983 | 11.971863976 |
| C       | 10.898035641 | 7.710283052  | 14.084079069 | Ni | -7.489850394 | 14.230105151 | 10.000000000 |
| C       | 10.897915992 | 9.146391603  | 14.087460509 | Ni | 3.633755875  | 0.670779358  | 13.959958814 |
| C       | 9.654677145  | 9.864506192  | 14.080908252 | Ni | 3.634064961  | 2.097849815  | 11.971918241 |
| C       | 9.654634035  | 11.300515687 | 14.086565984 | Ni | 2.398580438  | 1.384800067  | 10.000000000 |
| C       | 8.411263292  | 12.018455931 | 14.081848506 | Ni | 2.397507791  | 2.811994950  | 13.959127316 |
| C       | 8.411195560  | 13.454361411 | 14.088067696 | Ni | 2.398256328  | 4.238943424  | 11.971783934 |
| C       | 7.167787232  | 14.172263386 | 14.087395340 | Ni | 1.162522982  | 3.525681474  | 10.000000000 |
| C       | 15.871105930 | 0.529543822  | 14.090214285 | Ni | 1.161451276  | 4.952968905  | 13.958870770 |
| C       | 14.627783739 | 1.247589785  | 14.090394169 | Ni | 1.162672591  | 6.380211690  | 11.972408107 |
| C       | -0.294441569 | 2.682494999  | 14.084532035 | Ni | -0.073534474 | 5.666562882  | 10.000000000 |
| C       | -1.537828596 | 3.400697385  | 14.087068092 | Ni | -0.074104503 | 7.093322457  | 13.958996867 |
| C       | -1.537918182 | 4.836722278  | 14.083296007 | Ni | -0.073751157 | 8.521108795  | 11.971991915 |
| C       | -2.781190202 | 5.554889714  | 14.087447879 | Ni | -1.309591930 | 7.807444290  | 10.000000000 |
| C       | -2.781285575 | 6.991003624  | 14.086239100 | Ni | -1.310025172 | 9.234183479  | 13.959195554 |
| C       | -4.024296602 | 7.709145951  | 14.090517494 | Ni | -1.310310238 | 10.662244417 | 11.972059578 |
| C       | -4.024428476 | 9.145278576  | 14.092754275 | Ni | -2.545649386 | 9.948325698  | 10.000000000 |
| C       | -5.267483291 | 9.863313264  | 14.094301133 | Ni | -2.546598497 | 11.375522598 | 13.959993941 |
| C       | -5.267573857 | 11.299306706 | 14.094687836 | Ni | -2.546387279 | 12.802994246 | 11.972080050 |
| C       | -6.510800191 | 12.017308195 | 14.094180338 | Ni | -3.781706842 | 12.089207106 | 10.000000000 |
| C       | -6.510871866 | 13.453183515 | 14.093201537 | Ni | -3.782674325 | 13.516115908 | 13.960415347 |
| C       | -7.754229547 | 14.171167986 | 14.092386301 | Ni | -3.782120193 | 14.943575179 | 11.972613133 |
| C       | 0.949075635  | 0.528468248  | 14.089048956 | Ni | -5.017764298 | 14.230088513 | 10.000000000 |
| C       | -0.294363690 | 1.246492317  | 14.089550962 | Ni | 6.105711102  | 0.671143882  | 13.960339673 |
| IS-G/Ni |              |              |              | Ni | 6.106225832  | 2.098137334  | 11.972104714 |
| Ni      | 1.161683197  | 0.670542344  | 13.960390530 | Ni | 4.870666534  | 1.384783429  | 10.000000000 |
| Ni      | 1.161657764  | 2.097943531  | 11.972042196 | Ni | 4.869543347  | 2.812211181  | 13.960062588 |
| Ni      | -0.073505658 | 1.384816704  | 10.000000000 | Ni | 4.870240388  | 4.238968952  | 11.972185142 |
| Ni      | -0.074547161 | 2.811688232  | 13.959646483 | Ni | 3.634609078  | 3.525664837  | 10.000000000 |
| Ni      | -0.074299394 | 4.238997532  | 11.971769610 | Ni | 3.634359311  | 4.952595587  | 13.960899512 |
| Ni      | -1.309563114 | 3.525698112  | 10.000000000 | Ni | 3.634472725  | 6.380088777  | 11.973892327 |
| Ni      | -1.310700034 | 4.952749692  | 13.959472169 | Ni | 2.398551622  | 5.666546245  | 10.000000000 |
| Ni      | -1.310467276 | 6.379847850  | 11.971703960 | Ni | 2.398628875  | 7.092701678  | 13.961809468 |
| Ni      | -2.545620570 | 5.666579520  | 10.000000000 | Ni | 2.398563352  | 8.520217363  | 11.973312827 |
| Ni      | -2.546564374 | 7.093855558  | 13.959560623 | Ni | 1.162494166  | 7.807427653  | 10.000000000 |
| Ni      | -2.546429838 | 8.521100098  | 11.971987670 | Ni | 1.162352641  | 9.233667644  | 13.959944690 |
| Ni      | -3.781678026 | 7.807460927  | 10.000000000 | Ni | 1.162178220  | 10.661669375 | 11.971682253 |
| Ni      | -3.782471960 | 9.234720155  | 13.960097876 | Ni | -0.073563290 | 9.948309061  | 10.000000000 |
| Ni      | -3.782369126 | 10.661952056 | 11.972397623 | Ni | -0.074276991 | 11.375106915 | 13.959001079 |
| Ni      | -5.017735482 | 9.948342335  | 10.000000000 | Ni | -0.074116808 | 12.802999941 | 11.971970606 |
| Ni      | -5.018615599 | 11.375622363 | 13.960275733 | Ni | -1.309620746 | 12.089190468 | 10.000000000 |
| Ni      | -5.018162971 | 12.802694581 | 11.971741420 | Ni | -1.310828724 | 13.516191411 | 13.959788510 |

|    |              |              |              |    |              |              |              |
|----|--------------|--------------|--------------|----|--------------|--------------|--------------|
| Ni | -1.310264465 | 14.943625224 | 11.972006150 | Ni | 13.522053315 | 0.670882222  | 13.960517949 |
| Ni | -2.545678202 | 14.230071876 | 10.000000000 | Ni | 13.522489449 | 2.098254239  | 11.972525043 |
| Ni | 8.577494231  | 0.670786486  | 13.960232349 | Ni | 12.286924823 | 1.384733517  | 10.000000000 |
| Ni | 8.578685314  | 2.097967773  | 11.972233034 | Ni | 12.285902616 | 2.811825994  | 13.960429016 |
| Ni | 7.342752631  | 1.384766792  | 10.000000000 | Ni | 12.286439074 | 4.239201210  | 11.972639409 |
| Ni | 7.341927482  | 2.811493150  | 13.959592210 | Ni | 11.050867367 | 3.525614925  | 10.000000000 |
| Ni | 7.342796850  | 4.238804714  | 11.971961452 | Ni | 11.049735485 | 4.952784041  | 13.960711384 |
| Ni | 6.106695175  | 3.525648200  | 10.000000000 | Ni | 11.050626376 | 6.380120732  | 11.972859125 |
| Ni | 6.106454564  | 4.951961853  | 13.959602753 | Ni | 9.814809911  | 5.666496333  | 10.000000000 |
| Ni | 6.106766311  | 6.379699904  | 11.972554775 | Ni | 9.814093044  | 7.093567872  | 13.960780653 |
| Ni | 4.870637719  | 5.666529608  | 10.000000000 | Ni | 9.814700459  | 8.520869456  | 11.972376068 |
| Ni | 4.870126941  | 7.092869336  | 13.960697174 | Ni | 8.578752455  | 7.807377741  | 10.000000000 |
| Ni | 4.870745955  | 8.520288599  | 11.972751355 | Ni | 8.578493687  | 9.234340000  | 13.959579644 |
| Ni | 3.634580263  | 7.807411015  | 10.000000000 | Ni | 8.578331322  | 10.662165435 | 11.972315294 |
| Ni | 3.633551491  | 9.233848085  | 13.960101529 | Ni | 7.342694999  | 9.948259148  | 10.000000000 |
| Ni | 3.634205192  | 10.661617026 | 11.972128929 | Ni | 7.341942834  | 11.375037619 | 13.961310358 |
| Ni | 2.398522807  | 9.948292423  | 10.000000000 | Ni | 7.342014694  | 12.802634450 | 11.972394408 |
| Ni | 2.397732664  | 11.374516819 | 13.959314073 | Ni | 6.106637543  | 12.089140556 | 10.000000000 |
| Ni | 2.398073129  | 12.803019292 | 11.971987509 | Ni | 6.105605517  | 13.515701012 | 13.960304518 |
| Ni | 1.162465351  | 12.089173831 | 10.000000000 | Ni | 6.105866128  | 14.943309000 | 11.972486072 |
| Ni | 1.161481946  | 13.515925485 | 13.959161326 | Ni | 4.870580087  | 14.230021964 | 10.000000000 |
| Ni | 1.161966564  | 14.943774321 | 11.972325534 | Ni | 15.994034524 | 0.670802980  | 13.960400059 |
| Ni | -0.073592105 | 14.230055239 | 10.000000000 | Ni | 15.994332366 | 2.097797847  | 11.972276511 |
| Ni | 11.049742758 | 0.670893156  | 13.960256744 | Ni | 14.759010919 | 1.384716880  | 10.000000000 |
| Ni | 11.050660354 | 2.098067814  | 11.972296781 | Ni | 14.757892112 | 2.811699367  | 13.960597869 |
| Ni | 9.814838727  | 1.384750155  | 10.000000000 | Ni | 14.758215431 | 4.238828777  | 11.972669161 |
| Ni | 9.814120077  | 2.811648693  | 13.960002031 | Ni | 13.522953463 | 3.525598288  | 10.000000000 |
| Ni | 9.814750138  | 4.239204797  | 11.972385865 | Ni | 13.521839617 | 4.952707420  | 13.960908627 |
| Ni | 8.578781271  | 3.525631562  | 10.000000000 | Ni | 13.522090769 | 6.379932493  | 11.972852224 |
| Ni | 8.578105534  | 4.952022269  | 13.959968947 | Ni | 12.286896007 | 5.666479695  | 10.000000000 |
| Ni | 8.579061400  | 6.380100238  | 11.972016831 | Ni | 12.286039998 | 7.093649173  | 13.960804134 |
| Ni | 7.342723815  | 5.666512970  | 10.000000000 | Ni | 12.286292274 | 8.521038794  | 11.972327699 |
| Ni | 7.342118430  | 7.092430859  | 13.958777599 | Ni | 11.050838551 | 7.807361103  | 10.000000000 |
| Ni | 7.342707800  | 8.521261643  | 11.972449503 | Ni | 11.050638562 | 9.234477501  | 13.960218067 |
| Ni | 6.106666359  | 7.807394378  | 10.000000000 | Ni | 11.050097531 | 10.661976513 | 11.972453278 |
| Ni | 6.105110988  | 9.233755617  | 13.959451968 | Ni | 9.814781095  | 9.948242511  | 10.000000000 |
| Ni | 6.106825719  | 10.661825932 | 11.972767772 | Ni | 9.814057420  | 11.375368677 | 13.960215258 |
| Ni | 4.870608903  | 9.948275786  | 10.000000000 | Ni | 9.814184794  | 12.802733384 | 11.972371980 |
| Ni | 4.869404967  | 11.374728755 | 13.960271034 | Ni | 8.578723639  | 12.089123919 | 10.000000000 |
| Ni | 4.870343819  | 12.802371878 | 11.972188766 | Ni | 8.577502716  | 13.516041420 | 13.960069591 |
| Ni | 3.634551447  | 12.089157194 | 10.000000000 | Ni | 8.578127199  | 14.943335833 | 11.972281423 |
| Ni | 3.633440590  | 13.515932593 | 13.959600842 | Ni | 7.342666183  | 14.230005327 | 10.000000000 |
| Ni | 3.634368688  | 14.943424310 | 11.972505727 | C  | 1.159682739  | 0.670807177  | 16.097805715 |
| Ni | 2.398493991  | 14.230038601 | 10.000000000 | C  | -0.076401877 | 1.384357774  | 16.099223196 |

|   |              |              |              |   |              |              |              |
|---|--------------|--------------|--------------|---|--------------|--------------|--------------|
| C | -0.076158764 | 2.811654745  | 16.096676116 | C | 6.102916891  | 4.952355893  | 16.101924391 |
| C | -1.312241637 | 3.525073414  | 16.098902535 | C | 4.867257102  | 5.665904439  | 16.104752581 |
| C | -1.312109201 | 4.952444982  | 16.096266870 | C | 4.866971363  | 7.092674929  | 16.101752014 |
| C | -2.548119449 | 5.665639327  | 16.099916482 | C | 3.631345419  | 7.806506834  | 16.107126283 |
| C | -2.548164733 | 7.092906186  | 16.096443772 | C | 3.631505364  | 9.232921388  | 16.103697030 |
| C | -3.784430900 | 7.806349877  | 16.098664585 | C | 2.395649623  | 9.946532453  | 16.100718890 |
| C | -3.784368947 | 9.233611294  | 16.097904893 | C | 2.395539685  | 11.373691966 | 16.095386038 |
| C | -5.020776549 | 9.947128286  | 16.099150451 | C | 1.159512575  | 12.087564769 | 16.096018964 |
| C | -5.020757967 | 11.374574496 | 16.097986946 | C | 1.159299611  | 13.514953650 | 16.096279441 |
| C | -6.257007909 | 12.088193579 | 16.098106106 | C | -0.076854857 | 14.228919355 | 16.098236895 |
| C | -6.256803549 | 13.515879468 | 16.097406536 | C | 11.047496918 | 0.669841510  | 16.098651218 |
| C | -7.493008102 | 14.229426083 | 16.098340048 | C | 9.811505988  | 1.383802857  | 16.098798658 |
| C | 3.631584062  | 0.670877320  | 16.097947313 | C | 9.811378192  | 2.811161704  | 16.097603156 |
| C | 2.395670315  | 1.384622085  | 16.097318128 | C | 8.575249778  | 3.525005129  | 16.099182403 |
| C | 2.395674279  | 2.811774823  | 16.093835174 | C | 8.575127877  | 4.952174524  | 16.098221189 |
| C | 1.159813728  | 3.525391921  | 16.094555628 | C | 7.338922366  | 5.665609618  | 16.098096022 |
| C | 1.160019491  | 4.952616392  | 16.094574146 | C | 7.338813729  | 7.092610221  | 16.093061148 |
| C | -0.075918692 | 5.665900978  | 16.094307020 | C | 6.102636554  | 7.806225775  | 16.094283247 |
| C | -0.075753266 | 7.093172695  | 16.096825882 | C | 6.103035220  | 9.233199723  | 16.093691809 |
| C | -1.311920986 | 7.806416416  | 16.095275625 | C | 4.866858529  | 9.946782912  | 16.098616309 |
| C | -1.312034905 | 9.233640751  | 16.095641065 | C | 4.867274066  | 11.373800635 | 16.098318901 |
| C | -2.548348302 | 9.947319845  | 16.098450940 | C | 3.631339323  | 12.087333957 | 16.096344213 |
| C | -2.548391419 | 11.374515177 | 16.098390516 | C | 3.631148878  | 13.514868769 | 16.096200290 |
| C | -3.784607773 | 12.088379110 | 16.100022272 | C | 2.395256178  | 14.228624426 | 16.098141351 |
| C | -3.784733743 | 13.515907743 | 16.099444377 | C | 13.519855976 | 0.669838894  | 16.098610237 |
| C | -5.020707373 | 14.229601830 | 16.099539620 | C | 12.283801007 | 1.383557663  | 16.099201605 |
| C | 6.103424817  | 0.670665511  | 16.098473808 | C | 12.283855713 | 2.811095471  | 16.097959771 |
| C | 4.867606092  | 1.384575841  | 16.097956953 | C | 11.047648992 | 3.524664532  | 16.098477898 |
| C | 4.867484971  | 2.811744381  | 16.096590499 | C | 11.047752463 | 4.952034837  | 16.098048342 |
| C | 3.631731094  | 3.525745721  | 16.096649214 | C | 9.811201677  | 5.665536583  | 16.098454168 |
| C | 3.631607157  | 4.952573820  | 16.102848187 | C | 9.811360524  | 7.092698388  | 16.097637533 |
| C | 2.396043658  | 5.666149476  | 16.100812535 | C | 8.575072187  | 7.806217009  | 16.094258432 |
| C | 2.395868813  | 7.092976280  | 16.103868433 | C | 8.575161100  | 9.233404787  | 16.096715156 |
| C | 1.160078929  | 7.806346447  | 16.102886142 | C | 7.339072841  | 9.946849871  | 16.096267482 |
| C | 1.160000693  | 9.233224296  | 16.100070646 | C | 7.339186203  | 11.374096185 | 16.099117322 |
| C | -0.076056463 | 9.946962356  | 16.096649514 | C | 6.103105452  | 12.087418154 | 16.098626712 |
| C | -0.076203048 | 11.374161391 | 16.095862132 | C | 6.103316437  | 13.515017619 | 16.097468788 |
| C | -1.312580231 | 12.088145052 | 16.098097748 | C | 4.867322985  | 14.228610684 | 16.099071154 |
| C | -1.312678068 | 13.515525278 | 16.098322174 | C | 15.992265663 | 0.670199607  | 16.098894626 |
| C | -2.548717861 | 14.229386623 | 16.100880614 | C | 14.756047203 | 1.383852934  | 16.099224016 |
| C | 8.575479364  | 0.670175127  | 16.097288330 | C | 14.756339545 | 2.811296686  | 16.098712077 |
| C | 7.339399777  | 1.384213875  | 16.097402466 | C | 13.520221215 | 3.524685507  | 16.100023574 |
| C | 7.339214244  | 2.811610241  | 16.097458743 | C | 13.520240192 | 4.952161133  | 16.100342425 |
| C | 6.103334501  | 3.525441898  | 16.100528555 | C | 12.284025922 | 5.665424522  | 16.100397138 |

C 12.283981228 7.092662920 16.099307730  
C 11.047506347 7.806084733 16.100320388  
C 11.047605397 9.233355664 16.098693218  
C 9.811371689 9.946846482 16.099758830  
C 9.811323653 11.374305540 16.098543387  
C 8.575243867 12.087761799 16.100885120  
C 8.575532994 13.515365011 16.098563383  
C 7.339456044 14.228951211 16.099463132

INT-G-MAH

C 2.240162372 2.594119639 14.001500496  
C 1.008824847 3.305048138 14.003112210  
C 1.008858368 4.726782637 13.990231877  
C -0.222143374 5.437702742 14.009143258  
C -0.222009613 6.859284872 14.009515079  
C -1.453221181 7.570084078 14.036751444  
C -1.453365348 8.991621925 14.047231001  
C -2.684779802 9.702704775 14.063812001  
C -2.685069561 11.124589316 14.070747346  
C -3.916571204 11.835869793 14.067011847  
C -3.916653368 13.257925344 14.061799848  
C -5.147874384 13.969060447 14.045527884  
C 3.471311377 0.461363609 14.031441909  
C 2.240036038 1.172356345 14.019214327  
C 4.702617751 2.594330024 14.002962116  
C 3.471435414 3.305029076 13.986145920  
C 3.471096759 4.726427756 13.960286007  
C 2.240094770 5.437245376 13.963208963  
C 2.238874491 6.858377200 13.953085482  
C 1.008821129 7.569670085 13.983950386  
C 1.008754385 8.991117462 13.999465292  
C -0.221995514 9.702330031 14.034440003  
C -0.222377690 11.124149582 14.049535422  
C -1.453734541 11.835598283 14.068439095  
C -1.453921033 13.257702015 14.069420518  
C -2.685353525 13.969064521 14.064504889  
C 5.933782452 0.461395655 14.048363279  
C 4.702624745 1.172531981 14.028955641  
C 7.164831698 2.594349436 14.027093562  
C 5.933769630 3.305272896 13.999445185  
C 5.933604569 4.726251521 13.971291088  
C 4.702519247 5.436026807 13.945752950  
C 4.701655812 6.857797525 13.927967776  
C 3.470664349 7.568532721 13.932586294  
C 3.470930041 8.991922169 13.944276646

C 2.239170713 9.702466418 13.980804162  
C 2.239677762 11.124378511 14.004662151  
C 1.008592447 11.835513970 14.036789636  
C 1.008594486 13.257628014 14.049072547  
C -0.222732214 13.968901228 14.062306216  
C 8.396352845 0.461222624 14.057643807  
C 7.164997214 1.172551779 14.046784987  
C 9.627494144 2.594167882 14.052474113  
C 8.396096029 3.305090682 14.033938128  
C 8.395941488 4.726772826 14.018065007  
C 7.164695061 5.437016361 13.983070082  
C 7.165592330 6.858251341 13.965634793  
C 5.934182902 7.569712686 13.935247236  
C 5.934098924 8.993237592 13.929576351  
C 4.703615756 9.703563433 13.933805711  
C 4.703009860 11.125423034 13.965508902  
C 3.471149692 11.835867696 13.996033614  
C 3.471281877 13.257953175 14.020650563  
C 2.239876297 13.968851278 14.041660625  
C 10.859091292 0.461086026 14.052401616  
C 9.627699647 1.172204304 14.056226623  
C 12.090744705 2.594039478 14.060583087  
C 10.859043088 3.304877473 14.059062103  
C 10.859164619 4.726792379 14.055216762  
C 9.627368862 5.437352501 14.034057763  
C 9.628033128 6.859143579 14.023314374  
C 8.396611364 7.569670184 13.990532780  
C 8.397036337 8.991982039 13.986070615  
C 7.165772658 9.703583721 13.959191237  
C 7.165941842 11.125803952 13.976356404  
C 5.934579862 11.836719560 13.978795171  
C 5.934359070 13.258558187 14.005360200  
C 4.702863462 13.969158739 14.021105504  
C 13.322126822 0.461325069 14.039529557  
C 12.090650681 1.172128379 14.052278964  
C 14.553834572 2.594278019 14.046681720  
C 13.322296342 3.304978066 14.058424801  
C 13.322523626 4.726922874 14.060227900  
C 12.090764398 5.437621673 14.060760469  
C 12.091114063 6.859488094 14.056764219  
C 10.859481233 7.570245222 14.041094445  
C 10.859796740 8.992133329 14.037411211  
C 9.628489428 9.703143620 14.014292108  
C 9.628567958 11.125332981 14.017015134

|            |              |              |              |   |              |              |              |
|------------|--------------|--------------|--------------|---|--------------|--------------|--------------|
| C          | 8.397432445  | 11.836549207 | 14.002090020 | C | 3.470114198  | 3.306765932  | 13.975600891 |
| C          | 8.397310071  | 13.258510096 | 14.014622640 | C | 3.470883708  | 4.728334089  | 13.932460222 |
| C          | 7.165862188  | 13.969461299 | 14.016053540 | C | 2.239301329  | 5.439130181  | 13.930073023 |
| C          | 15.785106803 | 0.461595206  | 14.028332197 | C | 2.239617270  | 6.860393294  | 13.896440635 |
| C          | 14.553658090 | 1.172326584  | 14.039010491 | C | 1.008633818  | 7.570331284  | 13.914877510 |
| C          | -0.222415409 | 2.594059888  | 14.021687148 | C | 1.008422539  | 8.992280760  | 13.902090802 |
| C          | -1.453793474 | 3.304865222  | 14.034175306 | C | -0.222824494 | 9.703626010  | 13.935368509 |
| C          | -1.453519658 | 4.726786190  | 14.032350713 | C | -0.223309155 | 11.125636644 | 13.940608911 |
| C          | -2.685000593 | 5.437454083  | 14.049271663 | C | -1.454529884 | 11.836805013 | 13.975208290 |
| C          | -2.684728822 | 6.859240136  | 14.050715655 | C | -1.454911048 | 13.258578288 | 13.985813937 |
| C          | -3.916417220 | 7.570075848  | 14.059175230 | C | -2.686096501 | 13.969589805 | 14.008030088 |
| C          | -3.916395647 | 8.991808017  | 14.061786834 | C | 5.932497732  | 0.462985600  | 14.007995906 |
| C          | -5.147914518 | 9.702790670  | 14.054203268 | C | 4.701195592  | 1.173972266  | 14.011767906 |
| C          | -5.147947227 | 11.124818753 | 14.054668448 | C | 7.163478792  | 2.595777105  | 13.994415650 |
| C          | -6.379191812 | 11.835899806 | 14.037797748 | C | 5.932106265  | 3.306978567  | 13.975986224 |
| C          | -6.379252702 | 13.257967023 | 14.036660048 | C | 5.931158837  | 4.728595731  | 13.941301139 |
| C          | -7.610503749 | 13.969035187 | 14.025954882 | C | 4.701087036  | 5.439461506  | 13.904573711 |
| C          | 1.008777107  | 0.461246820  | 14.023962203 | C | 4.700881480  | 6.860679991  | 13.874436557 |
| C          | -0.222647789 | 1.172190627  | 14.025261503 | C | 3.470520258  | 7.571025162  | 13.867316323 |
| C          | 5.126055713  | 6.682252281  | 17.056695554 | C | 3.470713646  | 8.992490523  | 13.858776638 |
| C          | 5.408507682  | 8.133779621  | 16.949423582 | C | 2.239571134  | 9.702954296  | 13.869841685 |
| C          | 4.241532048  | 8.792838324  | 16.955853742 | C | 2.239101343  | 11.125396998 | 13.881668056 |
| C          | 3.145297796  | 7.801049741  | 17.067692131 | C | 1.008292116  | 11.836260662 | 13.918049967 |
| H          | 6.420877568  | 8.519578613  | 16.869285558 | C | 1.007775541  | 13.258176334 | 13.947782780 |
| H          | 4.048537665  | 9.859324334  | 16.882238523 | C | -0.223302855 | 13.969129004 | 13.976703713 |
| O          | 5.882450820  | 5.743697180  | 17.094785164 | C | 8.395169914  | 0.462618396  | 13.993286022 |
| O          | 1.951161808  | 7.964009483  | 17.116936653 | C | 7.163905145  | 1.173785506  | 14.000267309 |
| O          | 3.728579534  | 6.520302725  | 17.122019113 | C | 9.625803158  | 2.596060904  | 14.010895765 |
| INT-G-DMBD |              |              |              | C | 8.394546285  | 3.307097307  | 14.001261867 |
| C          | 2.238930514  | 2.595535925  | 14.002253938 | C | 8.393710111  | 4.729047142  | 13.992275621 |
| C          | 1.007599677  | 3.306372908  | 13.997826067 | C | 7.162282388  | 5.439449534  | 13.953802827 |
| C          | 1.008246181  | 4.728094192  | 13.967806925 | C | 7.161802386  | 6.861118515  | 13.931611666 |
| C          | -0.223157684 | 5.438924307  | 13.974324061 | C | 5.931152117  | 7.571337295  | 13.889816431 |
| C          | -0.222793372 | 6.860576503  | 13.953847983 | C | 5.931239300  | 8.992491432  | 13.896148374 |
| C          | -1.454312228 | 7.571665439  | 13.973091112 | C | 4.701145799  | 9.703159865  | 13.874486479 |
| C          | -1.454404791 | 8.993459218  | 13.967188087 | C | 4.701004838  | 11.124325358 | 13.898363017 |
| C          | -2.685775190 | 9.704493170  | 13.994416417 | C | 3.470375550  | 11.835902246 | 13.897435871 |
| C          | -2.686102036 | 11.126245872 | 13.997555093 | C | 3.469821210  | 13.257770741 | 13.937921974 |
| C          | -3.917569716 | 11.837062458 | 14.020111447 | C | 2.238844488  | 13.969306257 | 13.955377703 |
| C          | -3.917587897 | 13.258834157 | 14.023181894 | C | 10.857215505 | 0.462858198  | 13.986885383 |
| C          | -5.148893845 | 13.969676288 | 14.033732569 | C | 9.626175973  | 1.174056879  | 13.997523832 |
| C          | 3.469916419  | 0.463102946  | 14.026584684 | C | 12.088441232 | 2.595641887  | 14.023290560 |
| C          | 2.238442181  | 1.173710552  | 14.024882797 | C | 10.857134897 | 3.306966593  | 14.023403950 |
| C          | 4.701195756  | 2.595618985  | 13.988077470 | C | 10.856713814 | 4.728798405  | 14.027995496 |

|   |              |              |              |              |              |              |              |
|---|--------------|--------------|--------------|--------------|--------------|--------------|--------------|
| C | 9.625199648  | 5.439802898  | 14.010804248 | H            | 5.978793123  | 5.661144906  | 17.097342422 |
| C | 9.624815345  | 6.861630369  | 14.002243558 | H            | 4.140139451  | 5.734313816  | 16.823900619 |
| C | 8.393370418  | 7.571852874  | 13.965028388 | C            | 2.589203444  | 7.880366913  | 17.442274620 |
| C | 8.393025221  | 8.993486441  | 13.968761603 | H            | 1.689672874  | 8.485986412  | 17.388219398 |
| C | 7.161621463  | 9.703383691  | 13.940319449 | H            | 2.478682900  | 6.822328768  | 17.657370164 |
| C | 7.162087772  | 11.124656733 | 13.958306034 | C            | 2.981008646  | 10.619940522 | 17.217612485 |
| C | 5.930971224  | 11.835455165 | 13.940354387 | C            | 7.415174154  | 7.660492540  | 17.538933434 |
| C | 5.931506083  | 13.257296784 | 13.967933971 | H            | 3.397094600  | 11.628953694 | 17.116661325 |
| C | 4.700700662  | 13.968948572 | 13.967071640 | H            | 2.539722712  | 10.480421576 | 18.218669496 |
| C | 13.319413660 | 0.462535209  | 13.998653252 | H            | 2.203708731  | 10.459655255 | 16.453357453 |
| C | 12.088367642 | 1.173783499  | 14.004345533 | H            | 8.177436493  | 8.432755912  | 17.691460622 |
| C | 14.551035336 | 2.595357861  | 14.025169078 | H            | 7.611732230  | 7.117149847  | 16.600510267 |
| C | 13.319834907 | 3.306518344  | 14.028483817 | H            | 7.423927933  | 6.946011446  | 18.379260770 |
| C | 13.319802856 | 4.728307511  | 14.027748675 | INT-G/Cu-MAH |              |              |              |
| C | 12.088261284 | 5.439344559  | 14.031678478 | Cu           | 1.019755234  | 3.315780946  | 10.971215092 |
| C | 12.088132046 | 6.861177309  | 14.029545774 | Cu           | 2.263045180  | 2.596696856  | 8.863950186  |
| C | 10.856467812 | 7.572256256  | 14.021045009 | Cu           | 1.022040754  | 1.877670712  | 6.750759000  |
| C | 10.856129816 | 8.993842331  | 14.020032139 | Cu           | -0.223188092 | 5.469578183  | 10.971065075 |
| C | 9.624278726  | 9.704437257  | 14.002741825 | Cu           | 1.019502065  | 4.750176626  | 8.863480811  |
| C | 9.624553725  | 11.125994528 | 14.010076462 | Cu           | -0.221076590 | 4.031164483  | 6.750759000  |
| C | 8.392792063  | 11.836084142 | 13.993292427 | Cu           | -1.465687547 | 7.623470093  | 10.972753973 |
| C | 8.393706300  | 13.257799926 | 14.009690751 | Cu           | -0.223532492 | 6.903723744  | 8.864197523  |
| C | 7.162356479  | 13.968476167 | 14.000544848 | Cu           | -1.464193934 | 6.184658254  | 6.750759000  |
| C | 15.781518701 | 0.461986388  | 14.017843888 | Cu           | -2.708474181 | 9.776890037  | 10.974833352 |
| C | 14.550689607 | 1.173377018  | 14.016628098 | Cu           | -1.466339796 | 9.057049271  | 8.864990584  |
| C | -0.223795313 | 2.595345151  | 14.016729178 | Cu           | -2.707311278 | 8.338152025  | 6.750759000  |
| C | -1.454817966 | 3.306846844  | 14.017218854 | Cu           | -3.951854675 | 11.929772121 | 10.975504369 |
| C | -1.454647009 | 4.728551795  | 14.002883675 | Cu           | -2.708748299 | 11.210398336 | 8.866028943  |
| C | -2.686011845 | 5.439624140  | 14.012004687 | Cu           | -3.950428621 | 10.491645797 | 6.750759000  |
| C | -2.685810553 | 6.861283177  | 14.002207761 | Cu           | -5.195294147 | 14.082963386 | 10.974873842 |
| C | -3.917378902 | 7.572128007  | 14.018646508 | Cu           | -3.951391502 | 13.363949126 | 8.866194974  |
| C | -3.917366891 | 8.993699732  | 14.015197186 | Cu           | -5.193545965 | 12.645139568 | 6.750759000  |
| C | -5.149007328 | 9.704460676  | 14.025265231 | Cu           | 2.262937405  | 1.161913970  | 10.972784000 |
| C | -5.149133538 | 11.125994181 | 14.028467546 | Cu           | 3.506992274  | 0.443203531  | 8.865121231  |
| C | -6.380691485 | 11.836770628 | 14.028757891 | Cu           | -6.436663309 | 14.798633339 | 6.750759000  |
| C | -6.380256077 | 13.258465839 | 14.033911976 | Cu           | 3.506492028  | 3.315728742  | 10.968534723 |
| C | -7.611874936 | 13.968801342 | 14.029817027 | Cu           | 4.750813641  | 2.596670024  | 8.863317758  |
| C | 1.007126270  | 0.462421631  | 14.031307440 | Cu           | 3.508414445  | 1.877750960  | 6.750759000  |
| C | -0.224229552 | 1.173321453  | 14.026546505 | Cu           | 2.263293790  | 5.469981617  | 10.966715244 |
| C | 3.816290596  | 8.399176006  | 17.244304079 | Cu           | 3.507054727  | 4.750092855  | 8.861963405  |
| O | 4.077830136  | 9.723019767  | 17.036382076 | Cu           | 2.265297101  | 4.031244731  | 6.750759000  |
| C | 5.059268632  | 7.581109435  | 17.249241779 | Cu           | 1.020598551  | 7.624198711  | 10.968949133 |
| O | 6.165817732  | 8.348268478  | 17.477588522 | Cu           | 2.263185858  | 6.903900537  | 8.861603021  |
| C | 5.067080845  | 6.248829830  | 17.056705900 | Cu           | 1.022179757  | 6.184738502  | 6.750759000  |



|    |              |              |              |    |              |              |              |
|----|--------------|--------------|--------------|----|--------------|--------------|--------------|
| Cu | -0.222139360 | 9.777490759  | 10.971376305 | Cu | 4.751809795  | 8.338392768  | 6.750759000  |
| Cu | 1.020004280  | 9.057796691  | 8.862995177  | Cu | 3.507347101  | 11.931311604 | 10.969017981 |
| Cu | -0.220937587 | 8.338232273  | 6.750759000  | Cu | 4.751068878  | 11.212630366 | 8.862440299  |
| Cu | -1.464885445 | 11.930266406 | 10.973753258 | Cu | 3.508692451  | 10.491886539 | 6.750759000  |
| Cu | -0.222839722 | 11.211379744 | 8.863998718  | Cu | 2.264824555  | 14.083590835 | 10.972408492 |
| Cu | -1.464054931 | 10.491726044 | 6.750759000  | Cu | 3.507771029  | 13.366238116 | 8.863609286  |
| Cu | -2.708204545 | 14.083249595 | 10.974076092 | Cu | 2.265575107  | 12.645380311 | 6.750759000  |
| Cu | -1.465002870 | 13.364674532 | 8.865214053  | Cu | 9.723618276  | 1.162078256  | 10.973358602 |
| Cu | -2.707172275 | 12.645219815 | 6.750759000  | Cu | 10.966967824 | 0.444979118  | 8.865018516  |
| Cu | 4.750071127  | 1.162052552  | 10.971880341 | Cu | 1.022457763  | 14.798874082 | 6.750759000  |
| Cu | 5.994138476  | 0.443421569  | 8.864883267  | Cu | 10.966421525 | 3.315859660  | 10.973503874 |
| Cu | -3.950289618 | 14.798713587 | 6.750759000  | Cu | 12.210171956 | 2.598192007  | 8.865545823  |
| Cu | 5.993548890  | 3.316072655  | 10.968761134 | Cu | 10.967535518 | 1.877991703  | 6.750759000  |
| Cu | 7.238305544  | 2.596995376  | 8.864205982  | Cu | 9.723407989  | 5.470272455  | 10.971308799 |
| Cu | 5.994788136  | 1.877831207  | 6.750759000  | Cu | 10.967640979 | 4.750961175  | 8.864952168  |
| Cu | 4.750176580  | 5.470491829  | 10.965005965 | Cu | 9.724418174  | 4.031485474  | 6.750759000  |
| Cu | 5.995025588  | 4.750285827  | 8.862455077  | Cu | 8.480167624  | 7.624754551  | 10.969047821 |
| Cu | 4.751670792  | 4.031324978  | 6.750759000  | Cu | 9.724899820  | 6.904213141  | 8.864035555  |
| Cu | 3.507055391  | 7.624691097  | 10.962968987 | Cu | 8.481300830  | 6.184979245  | 6.750759000  |
| Cu | 4.751231130  | 6.904162115  | 8.860902291  | Cu | 7.236793944  | 9.778357909  | 10.967400428 |
| Cu | 3.508553448  | 6.184818750  | 6.750759000  | Cu | 8.481845564  | 9.058018792  | 8.862750041  |
| Cu | 2.264100040  | 9.778421088  | 10.967878353 | Cu | 7.238183486  | 8.338473016  | 6.750759000  |
| Cu | 3.507239277  | 9.058620533  | 8.862110788  | Cu | 5.993287403  | 11.931637677 | 10.969160619 |
| Cu | 2.265436104  | 8.338312521  | 6.750759000  | Cu | 7.238008182  | 11.212249529 | 8.862879434  |
| Cu | 1.021327094  | 11.930932499 | 10.970802363 | Cu | 5.995066142  | 10.491966787 | 6.750759000  |
| Cu | 2.263747276  | 11.212354550 | 8.862694319  | Cu | 4.750200216  | 14.083877677 | 10.972340103 |
| Cu | 1.022318760  | 10.491806292 | 6.750759000  | Cu | 5.994207161  | 13.366258677 | 8.863734114  |
| Cu | -0.221398049 | 14.083316418 | 10.973345019 | Cu | 4.751948798  | 12.645460558 | 6.750759000  |
| Cu | 1.021325273  | 13.365735056 | 8.864305167  | Cu | 12.209455419 | 1.162349852  | 10.973974126 |
| Cu | -0.220798584 | 12.645300063 | 6.750759000  | Cu | 13.452853519 | 0.445162548  | 8.865097310  |
| Cu | 7.237162203  | 1.162101002  | 10.972573395 | Cu | 3.508831454  | 14.798954329 | 6.750759000  |
| Cu | 8.480816732  | 0.444121712  | 8.865207570  | Cu | 13.452342637 | 3.315863157  | 10.974685597 |
| Cu | -1.463915928 | 14.798793834 | 6.750759000  | Cu | 14.695449319 | 2.597926746  | 8.865801666  |
| Cu | 8.480329324  | 3.316142313  | 10.971373806 | Cu | 13.453909208 | 1.878071950  | 6.750759000  |
| Cu | 9.724572389  | 2.597657899  | 8.864991345  | Cu | 12.209361935 | 5.470001345  | 10.974093158 |
| Cu | 8.481161827  | 1.877911455  | 6.750759000  | Cu | 13.452747719 | 4.751049133  | 8.865951668  |
| Cu | 7.237063335  | 5.470721325  | 10.967975437 | Cu | 12.210791865 | 4.031565721  | 6.750759000  |
| Cu | 8.481922461  | 4.750608664  | 8.863838780  | Cu | 10.966058694 | 7.624008964  | 10.973373649 |
| Cu | 7.238044483  | 4.031405226  | 6.750759000  | Cu | 12.210202185 | 6.904223682  | 8.865793936  |
| Cu | 5.994158821  | 7.625050248  | 10.964301715 | Cu | 10.967674521 | 6.185059492  | 6.750759000  |
| Cu | 7.238730462  | 6.904089271  | 8.861850681  | Cu | 9.722765835  | 9.777675033  | 10.972514078 |
| Cu | 5.994927139  | 6.184898997  | 6.750759000  | Cu | 10.967657162 | 9.057561552  | 8.865402743  |
| Cu | 4.750466732  | 9.778376116  | 10.966068698 | Cu | 9.724557177  | 8.338553264  | 6.750759000  |
| Cu | 5.994735724  | 9.058520995  | 8.861205745  | Cu | 8.479160259  | 11.930796486 | 10.972261839 |

|    |              |              |              |   |              |              |              |
|----|--------------|--------------|--------------|---|--------------|--------------|--------------|
| Cu | 9.724354329  | 11.211436167 | 8.865028817  | C | 3.435811869  | 3.401017640  | 14.060446417 |
| Cu | 8.481439833  | 10.492047035 | 6.750759000  | C | 3.435888551  | 4.836450221  | 14.044110315 |
| Cu | 7.235935289  | 14.083764103 | 10.973476612 | C | 2.193056900  | 5.554119363  | 14.047351649 |
| Cu | 8.480550413  | 13.365531471 | 8.865220181  | C | 2.192276722  | 6.988812730  | 14.036250743 |
| Cu | 7.238322489  | 12.645540806 | 6.750759000  | C | 0.950031475  | 7.706585180  | 14.052247107 |
| Cu | 14.694945845 | 1.162235200  | 10.974698232 | C | 0.949848832  | 9.141770757  | 14.057898476 |
| Cu | 15.938722106 | 0.444774808  | 8.865653232  | C | -0.292885366 | 9.859739098  | 14.073477938 |
| Cu | 5.995205145  | 14.799034577 | 6.750759000  | C | -0.293441539 | 11.295535236 | 14.079284919 |
| Cu | -1.466487104 | 3.315373371  | 10.974020301 | C | -1.536567500 | 12.013718777 | 14.087731800 |
| Cu | -0.223554042 | 2.597005498  | 8.865299573  | C | -1.536815069 | 13.449657111 | 14.088493682 |
| Cu | 15.940282899 | 1.878152198  | 6.750759000  | C | -2.779940119 | 14.167798521 | 14.088982491 |
| Cu | -2.709201333 | 5.469308992  | 10.974077323 | C | 5.921770419  | 0.529230472  | 14.082077631 |
| Cu | -1.466710701 | 4.750298889  | 8.865141129  | C | 4.678724358  | 1.247420105  | 14.077580701 |
| Cu | 14.697165555 | 4.031645969  | 6.750759000  | C | 7.164575662  | 2.683034151  | 14.068781389 |
| Cu | -3.952041747 | 7.623304721  | 10.975075197 | C | 5.921759559  | 3.401078951  | 14.058092291 |
| Cu | -2.709418946 | 6.903581818  | 8.865804150  | C | 5.921602477  | 4.835955315  | 14.041811938 |
| Cu | 13.454048211 | 6.185139740  | 6.750759000  | C | 4.678849763  | 5.552919156  | 14.030252429 |
| Cu | -5.195381628 | 9.776648869  | 10.975708432 | C | 4.678420991  | 6.988259413  | 14.020509466 |
| Cu | -3.951789937 | 9.056852692  | 8.866368763  | C | 3.435592087  | 7.705927327  | 14.024789050 |
| Cu | 12.210930867 | 8.338633511  | 6.750759000  | C | 3.435795922  | 9.142272750  | 14.034662415 |
| Cu | -6.438975816 | 11.929878556 | 10.975050465 | C | 2.192375901  | 9.859769507  | 14.051747013 |
| Cu | -5.194470848 | 11.210253596 | 8.866415166  | C | 2.192531349  | 11.295496543 | 14.064296598 |
| Cu | 10.967813524 | 10.492127282 | 6.750759000  | C | 0.949463035  | 12.013750306 | 14.076358305 |
| Cu | -7.682367563 | 14.082972421 | 10.974703486 | C | 0.949401310  | 13.449654176 | 14.082623318 |
| Cu | -6.437741634 | 13.364195418 | 8.866103070  | C | -0.293735931 | 14.167727507 | 14.086780055 |
| Cu | 9.724696180  | 12.645621053 | 6.750759000  | C | 8.407943121  | 0.529156981  | 14.083913876 |
| Cu | -0.223685847 | 1.161830552  | 10.974515500 | C | 7.164879690  | 1.247283641  | 14.079262204 |
| Cu | 1.020176006  | 0.443492248  | 8.865743119  | C | 9.650931702  | 2.682824069  | 14.079694150 |
| Cu | 8.481578836  | 14.799114825 | 6.750759000  | C | 8.407764949  | 3.400652079  | 14.070601636 |
| C  | 2.192715671  | 2.683080863  | 14.072116028 | C | 8.407419413  | 4.836180721  | 14.063724244 |
| C  | 0.949614745  | 3.400849140  | 14.074561504 | C | 7.1644464518 | 5.553418535  | 14.048258652 |
| C  | 0.949902187  | 4.836452801  | 14.064544167 | C | 7.165094428  | 6.988412144  | 14.044360688 |
| C  | -0.293096573 | 5.554016990  | 14.072080990 | C | 5.922086281  | 7.706614195  | 14.029962570 |
| C  | -0.292827886 | 6.989465742  | 14.067187537 | C | 5.922106188  | 9.143296430  | 14.033115614 |
| C  | -1.536125288 | 7.706831729  | 14.079178176 | C | 4.679621522  | 9.860604444  | 14.035597991 |
| C  | -1.536285922 | 9.142336479  | 14.080643138 | C | 4.679203956  | 11.296254904 | 14.055971667 |
| C  | -2.779564188 | 9.860127566  | 14.089737807 | C | 3.435652294  | 12.013953943 | 14.066758582 |
| C  | -2.779827872 | 11.295932769 | 14.090782648 | C | 3.435753721  | 13.449989135 | 14.078432331 |
| C  | -4.023010210 | 12.013911669 | 14.094013615 | C | 2.192516019  | 14.167804786 | 14.083573642 |
| C  | -4.023095789 | 13.449830301 | 14.091272152 | C | 10.894367038 | 0.529218384  | 14.086526587 |
| C  | -5.266240902 | 14.167902343 | 14.090617733 | C | 9.651153337  | 1.247058947  | 14.084186403 |
| C  | 3.435632728  | 0.529346754  | 14.083358389 | C | 12.137714614 | 2.682848476  | 14.087851209 |
| C  | 2.192494171  | 1.247317644  | 14.082346477 | C | 10.894364798 | 3.400472521  | 14.083671721 |
| C  | 4.678783214  | 2.683258622  | 14.064388645 | C | 10.894377752 | 4.836177772  | 14.081663217 |

|   |              |              |              |               |               |               |               |
|---|--------------|--------------|--------------|---------------|---------------|---------------|---------------|
| C | 9.650897018  | 5.553666148  | 14.073735322 | H             | 4.071577052   | 9.940975729   | 17.163232949  |
| C | 9.651444664  | 6.989208442  | 14.073956788 | O             | 5.898503432   | 5.813133797   | 17.098061273  |
| C | 8.407944508  | 7.706650547  | 14.062590097 | O             | 1.962748966   | 8.040055502   | 17.154842178  |
| C | 8.408435607  | 9.142617172  | 14.067688244 | O             | 3.746077852   | 6.599787488   | 17.141352158  |
| C | 7.165143297  | 9.860774399  | 14.056541608 | INT-G/Cu-DMBD |               |               |               |
| C | 7.165560126  | 11.296831303 | 14.068735232 | Cu            | 1.0202793297  | 3.3118767343  | 10.9694660316 |
| C | 5.922392983  | 12.014599867 | 14.068312199 | Cu            | 2.2637250677  | 2.5946290559  | 8.8616688323  |
| C | 5.922370545  | 13.450481899 | 14.080269104 | Cu            | 1.0221950017  | 1.8776898973  | 6.7507590000  |
| C | 4.679054082  | 14.168044646 | 14.083308526 | Cu            | -0.2227974229 | 5.4653755415  | 10.9698472862 |
| C | 13.380955661 | 0.529419566  | 14.088460366 | Cu            | 1.0200660290  | 4.7478966463  | 8.8611729876  |
| C | 12.137659536 | 1.247062324  | 14.088705188 | Cu            | -0.2209921951 | 4.0311415332  | 6.7507590000  |
| C | 14.624463007 | 2.683089686  | 14.089532438 | Cu            | -1.4652628963 | 7.6191780442  | 10.9709883904 |
| C | 13.381076205 | 3.400638625  | 14.089134728 | Cu            | -0.2227540792 | 6.9011558751  | 8.8616708376  |
| C | 13.381304881 | 4.836397345  | 14.088081618 | Cu            | -1.4641793920 | 6.1845931692  | 6.7507590000  |
| C | 12.137816865 | 5.553926897  | 14.086562598 | Cu            | -2.7080491926 | 9.7724890082  | 10.9717968887 |
| C | 12.138154704 | 6.989617086  | 14.087732990 | Cu            | -1.4654104585 | 9.0545660022  | 8.8625165236  |
| C | 10.894710913 | 7.707174187  | 14.084803544 | Cu            | -2.7073665888 | 8.3380448051  | 6.7507590000  |
| C | 10.895043362 | 9.142952035  | 14.088432779 | Cu            | -3.9516380025 | 11.9254506895 | 10.9714800808 |
| C | 9.651787934  | 9.860756410  | 14.083279266 | Cu            | -2.7081517238 | 11.2081866758 | 8.8631555734  |
| C | 9.651969995  | 11.296681253 | 14.087336052 | Cu            | -3.9505537856 | 10.4914964410 | 6.7507590000  |
| C | 8.408873599  | 12.014699629 | 14.082911457 | Cu            | -5.1953142242 | 14.0790064807 | 10.9703918658 |
| C | 8.408873768  | 13.450572996 | 14.088082868 | Cu            | -3.9513795107 | 13.3617131700 | 8.8628905814  |
| C | 7.165680480  | 14.168357254 | 14.087416919 | Cu            | -5.1937409825 | 12.6449480770 | 6.7507590000  |
| C | 15.867586034 | 0.529704304  | 14.090008130 | Cu            | 2.2634851142  | 1.1583803467  | 10.9698661678 |
| C | 14.624284279 | 1.247302247  | 14.090225688 | Cu            | 3.5075491762  | 0.4412131322  | 8.8623329449  |
| C | -0.293559356 | 2.682834977  | 14.084439629 | Cu            | -6.4369281793 | 14.7983997129 | 6.7507590000  |
| C | -1.536828743 | 3.400444900  | 14.086866606 | Cu            | 3.5069054637  | 3.3117481410  | 10.9669966245 |
| C | -1.536493608 | 4.836156269  | 14.082825036 | Cu            | 4.7515241992  | 2.5947586751  | 8.8610567971  |
| C | -2.779924088 | 5.553612561  | 14.086855719 | Cu            | 3.5088227155  | 1.8778361707  | 6.7507590000  |
| C | -2.779620971 | 6.989269879  | 14.086106057 | Cu            | 2.2630587049  | 5.4653490681  | 10.9661069661 |
| C | -4.023062997 | 7.706817582  | 14.090371214 | Cu            | 3.5077011249  | 4.7481441562  | 8.8605298982  |
| C | -4.022981510 | 9.142527111  | 14.092304197 | Cu            | 2.2656355186  | 4.0312878066  | 6.7507590000  |
| C | -5.266279444 | 9.860256113  | 14.094259270 | Cu            | 1.0204547737  | 7.6191979899  | 10.9686453919 |
| C | -5.266268407 | 11.296084288 | 14.094840327 | Cu            | 2.2641395964  | 6.9016247379  | 8.8604840472  |
| C | -6.509419844 | 12.014043175 | 14.093821600 | Cu            | 1.0224483218  | 6.1847394426  | 6.7507590000  |
| C | -6.509403695 | 13.449943088 | 14.092476691 | Cu            | -0.2220105229 | 9.7725541592  | 10.9704307849 |
| C | -7.752524284 | 14.167931311 | 14.091563772 | Cu            | 1.0210960220  | 9.0549330186  | 8.8612883080  |
| C | 0.949358040  | 0.529284687  | 14.088384156 | Cu            | -0.2207388751 | 8.3381910785  | 6.7507590000  |
| C | -0.293812260 | 1.247081498  | 14.089128482 | Cu            | -1.4647506697 | 11.9255662927 | 10.9717856788 |
| C | 5.146762980  | 6.762103306  | 17.127097266 | Cu            | -0.2217688850 | 11.2085168283 | 8.8620225199  |
| C | 5.430080678  | 8.207252063  | 17.140596860 | Cu            | -1.4639260719 | 10.4916427145 | 6.7507590000  |
| C | 4.256994172  | 8.871165130  | 17.158846291 | Cu            | -2.7082225918 | 14.0789245106 | 10.9705126949 |
| C | 3.163608234  | 7.884778476  | 17.156022058 | Cu            | -1.4644933310 | 13.3619676308 | 8.8627994225  |
| H | 6.442984740  | 8.598322181  | 17.125311129 | Cu            | -2.7071132687 | 12.6450943504 | 6.7507590000  |

|    |               |               |               |    |               |               |               |
|----|---------------|---------------|---------------|----|---------------|---------------|---------------|
| Cu | 4.7505082696  | 1.1586066664  | 10.9692491105 | Cu | 1.0229549619  | 14.7988385332 | 6.7507590000  |
| Cu | 5.9948272350  | 0.4413504572  | 8.8621291391  | Cu | 10.9674387808 | 3.3125700258  | 10.9712720085 |
| Cu | -3.9503004656 | 14.7985459864 | 6.7507590000  | Cu | 12.2114834789 | 2.5963981180  | 8.8630144385  |
| Cu | 5.9943850271  | 3.3120880443  | 10.9662238383 | Cu | 10.9687058567 | 1.8782749910  | 6.7507590000  |
| Cu | 7.2392102152  | 2.5950858525  | 8.8610385092  | Cu | 9.7249042014  | 5.4660294117  | 10.9685468686 |
| Cu | 5.9954504292  | 1.8779824441  | 6.7507590000  | Cu | 10.9694039349 | 4.7488616062  | 8.8621639570  |
| Cu | 4.7507275202  | 5.4656723500  | 10.9651762579 | Cu | 9.7255186599  | 4.0317266269  | 6.7507590000  |
| Cu | 5.9955662128  | 4.7486077901  | 8.8602296666  | Cu | 8.4818642042  | 7.6199904223  | 10.9656605813 |
| Cu | 4.7522632324  | 4.0314340801  | 6.7507590000  | Cu | 9.7265985592  | 6.9017576007  | 8.8609788978  |
| Cu | 3.5069619968  | 7.6195150306  | 10.9651736656 | Cu | 8.4823314630  | 6.1851782629  | 6.7507590000  |
| Cu | 4.7517353093  | 6.9019896433  | 8.8603940746  | Cu | 7.2383542706  | 9.7742310824  | 10.9659957694 |
| Cu | 3.5090760355  | 6.1848857160  | 6.7507590000  | Cu | 8.4827049288  | 9.0554918910  | 8.8606653057  |
| Cu | 2.2638908731  | 9.7734892984  | 10.9668378313 | Cu | 7.2391442662  | 8.3386298988  | 6.7507590000  |
| Cu | 3.5084339274  | 9.0557508136  | 8.8618923120  | Cu | 5.9947162996  | 11.9276587637 | 10.9680551448 |
| Cu | 2.2658888387  | 8.3383373520  | 6.7507590000  | Cu | 7.2388130574  | 11.2099461903 | 8.8610107643  |
| Cu | 1.0214723822  | 11.9261641586 | 10.9689304260 | Cu | 5.9959570694  | 10.4920815348 | 6.7507590000  |
| Cu | 2.2651460643  | 11.2093357668 | 8.8611502824  | Cu | 4.7512618160  | 14.0806271212 | 10.9700683885 |
| Cu | 1.0227016419  | 10.4917889879 | 6.7507590000  | Cu | 5.9949746895  | 13.3640585531 | 8.8619781759  |
| Cu | -0.2213276000 | 14.0791072907 | 10.9701903634 | Cu | 4.7527698725  | 12.6455331707 | 6.7507590000  |
| Cu | 1.0223461122  | 13.3627829044 | 8.8620138106  | Cu | 12.2104679375 | 1.1593688857  | 10.9712815155 |
| Cu | -0.2204855550 | 12.6452406239 | 6.7507590000  | Cu | 13.4541506627 | 0.4434819359  | 8.8626035667  |
| Cu | 7.2377113653  | 1.1586410329  | 10.9691568256 | Cu | 3.5095826757  | 14.7989848067 | 6.7507590000  |
| Cu | 8.4818686469  | 0.4417461388  | 8.8620637020  | Cu | 13.4538460825 | 3.3127232525  | 10.9715595097 |
| Cu | -1.4636727518 | 14.7986922598 | 6.7507590000  | Cu | 14.6971647411 | 2.5963581866  | 8.8630927620  |
| Cu | 8.4812959059  | 3.3124862472  | 10.9686228765 | Cu | 13.4553335705 | 1.8784212644  | 6.7507590000  |
| Cu | 9.7258030121  | 2.5956013175  | 8.8620392378  | Cu | 12.2109490023 | 5.4663320174  | 10.9707909786 |
| Cu | 8.4820781430  | 1.8781287176  | 6.7507590000  | Cu | 13.4546953076 | 4.7492818082  | 8.8630529573  |
| Cu | 7.2386736183  | 5.4658063699  | 10.9643228464 | Cu | 12.2121463736 | 4.0318729004  | 6.7507590000  |
| Cu | 8.4833372205  | 4.7484698361  | 8.8604162486  | Cu | 10.9680774018 | 7.6198379798  | 10.9691504946 |
| Cu | 7.2388909461  | 4.0315803535  | 6.7507590000  | Cu | 12.2123846896 | 6.9021159921  | 8.8623654819  |
| Cu | 5.9951370974  | 7.6200626025  | 10.9637606759 | Cu | 10.9689591768 | 6.1853245363  | 6.7507590000  |
| Cu | 7.2395528695  | 6.9019074342  | 8.8595819438  | Cu | 9.7244708997  | 9.7733688271  | 10.9684166765 |
| Cu | 5.9957037493  | 6.1850319895  | 6.7507590000  | Cu | 10.9691455135 | 9.0553459314  | 8.8619519207  |
| Cu | 4.7516931712  | 9.7745400031  | 10.9660747363 | Cu | 9.7257719800  | 8.3387761723  | 6.7507590000  |
| Cu | 5.9956135351  | 9.0559132257  | 8.8603826190  | Cu | 8.4808703714  | 11.9269060299 | 10.9695852437 |
| Cu | 4.7525165524  | 8.3384836254  | 6.7507590000  | Cu | 9.7253201240  | 11.2092467352 | 8.8621316417  |
| Cu | 3.5080378995  | 11.9276184858 | 10.9672402271 | Cu | 8.4825847831  | 10.4922278082 | 6.7507590000  |
| Cu | 4.7519923888  | 11.2100295569 | 8.8608968415  | Cu | 7.2373823482  | 14.0803073781 | 10.9703020826 |
| Cu | 3.5093293556  | 10.4919352613 | 6.7507590000  | Cu | 8.4815199581  | 13.3633599026 | 8.8626654006  |
| Cu | 2.2649249976  | 14.0802664733 | 10.9698112624 | Cu | 7.2393975863  | 12.6456794442 | 6.7507590000  |
| Cu | 3.5086473437  | 13.3639604897 | 8.8615867339  | Cu | 14.6966791419 | 1.1594399278  | 10.9711750372 |
| Cu | 2.2661421588  | 12.6453868973 | 6.7507590000  | Cu | 15.9402882100 | 0.4430294284  | 8.8628517790  |
| Cu | 9.7241983582  | 1.1589365541  | 10.9701743493 | Cu | 5.9962103894  | 14.7991310801 | 6.7507590000  |
| Cu | 10.9682191451 | 0.4429162820  | 8.8622357340  | Cu | -1.4660001460 | 3.3116807742  | 10.9708504997 |

|    |               |               |               |   |               |               |               |
|----|---------------|---------------|---------------|---|---------------|---------------|---------------|
| Cu | -0.2231110692 | 2.5948186752  | 8.8625000534  | C | -1.4925375703 | 13.3405186983 | 14.0851828261 |
| Cu | 15.9419612842 | 1.8785675379  | 6.7507590000  | C | -2.7360345672 | 14.0585804616 | 14.0857823103 |
| Cu | -2.7089463111 | 5.4654557555  | 10.9708066678 | C | 5.9661708103  | 0.4200936842  | 14.0829699027 |
| Cu | -1.4661685581 | 4.7480303181  | 8.8624661806  | C | 4.7228126402  | 1.1378118794  | 14.0798663556 |
| Cu | 14.6987740874 | 4.0320191738  | 6.7507590000  | C | 7.2091207476  | 2.5743033775  | 14.0767112356 |
| Cu | -3.9517317390 | 7.6192838601  | 10.9706342216 | C | 5.9657256349  | 3.2923252952  | 14.0649890803 |
| Cu | -2.7085911751 | 6.9012685496  | 8.8626740152  | C | 5.9649921629  | 4.7281054769  | 14.0458409809 |
| Cu | 13.4555868905 | 6.1854708098  | 6.7507590000  | C | 4.7225444397  | 5.4458087020  | 14.0306990677 |
| Cu | -5.1951762899 | 9.7724663228  | 10.9704640964 | C | 4.7227430594  | 6.8812931035  | 14.0198587055 |
| Cu | -3.9513014840 | 9.0546629792  | 8.8628005222  | C | 3.4808373733  | 7.5982215516  | 14.0281658338 |
| Cu | 12.2123996937 | 8.3389224457  | 6.7507590000  | C | 3.4814913028  | 9.0334054821  | 14.0285422884 |
| Cu | -6.4388464284 | 11.9254899440 | 10.9704446004 | C | 2.2385498502  | 9.7507808076  | 14.0408828663 |
| Cu | -5.1946439687 | 11.2080761541 | 8.8628551368  | C | 2.2377082245  | 11.1870659989 | 14.0457490418 |
| Cu | 10.9692124969 | 10.4923740816 | 6.7507590000  | C | 0.9945745279  | 11.9048182557 | 14.0664664577 |
| Cu | -7.6823151603 | 14.0789573721 | 10.9701022477 | C | 0.9941490201  | 13.3409130763 | 14.0758388240 |
| Cu | -6.4381589265 | 13.3617977845 | 8.8628451418  | C | -0.2494869984 | 14.0587981971 | 14.0843330905 |
| Cu | 9.7260253000  | 12.6458257176 | 6.7507590000  | C | 8.4528037709  | 0.4204594962  | 14.0860607877 |
| Cu | -0.2230777079 | 1.1582058393  | 10.9704205858 | C | 7.2091492590  | 1.1383119388  | 14.0834465958 |
| Cu | 1.0204954464  | 0.4413941318  | 8.8627018770  | C | 9.6957177771  | 2.5742895555  | 14.0860387360 |
| Cu | 8.4828381032  | 14.7992773535 | 6.7507590000  | C | 8.4522145572  | 3.2922323134  | 14.0794788650 |
| C  | 2.2364020628  | 2.5737277320  | 14.0778637813 | C | 8.4516483329  | 4.7282581866  | 14.0696754595 |
| C  | 0.9930915706  | 3.2914855207  | 14.0804283538 | C | 7.2079579918  | 5.4462110110  | 14.0506145302 |
| C  | 0.9932873579  | 4.7274581414  | 14.0722471816 | C | 7.2080573892  | 6.8818962839  | 14.0364287466 |
| C  | -0.2499566725 | 5.4447851811  | 14.0802788279 | C | 5.9651480995  | 7.5994862359  | 14.0250732172 |
| C  | -0.2490479466 | 6.8804156511  | 14.0775684148 | C | 5.9659381224  | 9.0342112669  | 14.0351718372 |
| C  | -1.4925387611 | 7.5979426362  | 14.0852634876 | C | 4.7236323376  | 9.7515884727  | 14.0327954126 |
| C  | -1.4923957895 | 9.0335257687  | 14.0844605624 | C | 4.7235183562  | 11.1866932731 | 14.0480419053 |
| C  | -2.7359123915 | 9.7513673148  | 14.0898108907 | C | 3.4808730741  | 11.9048335757 | 14.0525552619 |
| C  | -2.7361892015 | 11.1871410575 | 14.0887805879 | C | 3.4803999729  | 13.3407713077 | 14.0679367223 |
| C  | -3.9798241859 | 11.9051409233 | 14.0891771878 | C | 2.2372498977  | 14.0588947638 | 14.0767201884 |
| C  | -3.9796821929 | 13.3406155603 | 14.0856279937 | C | 10.9392809304 | 0.4205520964  | 14.0846847081 |
| C  | -5.2231593791 | 14.0586198488 | 14.0862620538 | C | 9.6958412412  | 1.1385519865  | 14.0874378596 |
| C  | 3.4793202020  | 0.4200512459  | 14.0838005010 | C | 12.1828350926 | 2.5740503363  | 14.0874266589 |
| C  | 2.2359633610  | 1.1379669562  | 14.0857569392 | C | 10.9393663510 | 3.2919667319  | 14.0866858164 |
| C  | 4.7229736857  | 2.5737378136  | 14.0694415302 | C | 10.9390576756 | 4.7278983987  | 14.0845227869 |
| C  | 3.4798477491  | 3.2917623117  | 14.0653789759 | C | 9.6954255630  | 5.4457593229  | 14.0767097532 |
| C  | 3.4803202446  | 4.7276764448  | 14.0483995545 | C | 9.6955616772  | 6.8814907487  | 14.0703430949 |
| C  | 2.2367614720  | 5.4454557154  | 14.0562572685 | C | 8.4522876382  | 7.5992841460  | 14.0513405514 |
| C  | 2.2377510017  | 6.8806076473  | 14.0468110784 | C | 8.4524806489  | 9.0347265443  | 14.0591669320 |
| C  | 0.9948462521  | 7.5974970193  | 14.0628900419 | C | 7.2091463724  | 9.7519034939  | 14.0535153300 |
| C  | 0.9954121235  | 9.0330635819  | 14.0606232496 | C | 7.2095894753  | 11.1871092333 | 14.0660977893 |
| C  | -0.2483342784 | 9.7509543305  | 14.0755008403 | C | 5.9663085212  | 11.9047913067 | 14.0641462976 |
| C  | -0.2488771972 | 11.1868512455 | 14.0762904252 | C | 5.9668937043  | 13.3404745329 | 14.0754353282 |
| C  | -1.4924612898 | 11.9049169668 | 14.0854053145 | C | 4.7239961562  | 14.0586879708 | 14.0767824470 |

|   |               |               |               |              |              |               |               |
|---|---------------|---------------|---------------|--------------|--------------|---------------|---------------|
| C | 13.4260453917 | 0.4202935394  | 14.0855688129 | H            | 2.1764956852 | 10.4347499637 | 16.6417784373 |
| C | 12.1829589269 | 1.1383563225  | 14.0867930197 | H            | 8.1953409193 | 8.4579010986  | 17.7223099804 |
| C | 14.6694868422 | 2.5741614606  | 14.0896476860 | H            | 7.6026774541 | 7.1493323235  | 16.6375494911 |
| C | 13.4262053331 | 3.2919198863  | 14.0880530923 | H            | 7.4653376770 | 6.9647260020  | 18.4184073865 |
| C | 13.4260131496 | 4.7279256140  | 14.0889127519 | INT-G/Ni-MAH |              |               |               |
| C | 12.1825159825 | 5.4456930464  | 14.0878406862 | Ni           | 1.161046704  | 0.670701128   | 13.962380386  |
| C | 12.1829140518 | 6.8812957567  | 14.0879340445 | Ni           | 1.161686117  | 2.097994176   | 11.973661347  |
| C | 10.9394155038 | 7.5993188038  | 14.0816144561 | Ni           | -0.073518339 | 1.384372011   | 10.000000000  |
| C | 10.9396918026 | 9.0347455901  | 14.0820658471 | Ni           | -0.074529217 | 2.810930981   | 13.962465720  |
| C | 9.6962605820  | 9.7524526582  | 14.0758108478 | Ni           | -0.073971910 | 4.238348528   | 11.974044215  |
| C | 9.6961679389  | 11.1880246365 | 14.0823461010 | Ni           | -1.309239718 | 3.524595095   | 10.000000000  |
| C | 8.4527038961  | 11.9054765451 | 14.0798480314 | Ni           | -1.310763860 | 4.951231136   | 13.963468940  |
| C | 8.4532617775  | 13.3410797828 | 14.0864478016 | Ni           | -1.309608691 | 6.378359903   | 11.974266734  |
| C | 7.2100448327  | 14.0589065771 | 14.0856350066 | Ni           | -2.544961098 | 5.664818179   | 10.000000000  |
| C | 15.9124875916 | 0.4204322941  | 14.0901361368 | Ni           | -2.546821756 | 7.091628346   | 13.962718968  |
| C | 14.6694135393 | 1.1383621424  | 14.0893918382 | Ni           | -2.545639370 | 8.518248836   | 11.973298232  |
| C | -0.2502318769 | 2.5732530834  | 14.0881464632 | Ni           | -3.780682477 | 7.805041264   | 10.000000000  |
| C | -1.4934180003 | 3.2909700061  | 14.0892446134 | Ni           | -3.782576711 | 9.231271584   | 13.961935764  |
| C | -1.4936361243 | 4.7268299416  | 14.0866448913 | Ni           | -3.781438323 | 10.658496904  | 11.973743570  |
| C | -2.7367338665 | 5.4445243421  | 14.0899189568 | Ni           | -5.016403856 | 9.945264348   | 10.000000000  |
| C | -2.7363731076 | 6.8801220213  | 14.0890896515 | Ni           | -5.018010199 | 11.371400943  | 13.962511288  |
| C | -3.9798526950 | 7.5981113305  | 14.0904878203 | Ni           | -5.016921606 | 12.798596322  | 11.973336231  |
| C | -3.9794754235 | 9.0336527727  | 14.0902346831 | Ni           | -6.252125235 | 12.085487433  | 10.000000000  |
| C | -5.2231111130 | 9.7514973545  | 14.0886094696 | Ni           | -6.253535718 | 13.511840192  | 13.962098203  |
| C | -5.2231894380 | 11.1872708508 | 14.0884529043 | Ni           | -6.252658844 | 14.939058529  | 11.973374747  |
| C | -6.4667946378 | 11.9049227866 | 14.0881164250 | Ni           | -7.487846614 | 14.225710517  | 10.000000000  |
| C | -6.4665225249 | 13.3404946965 | 14.0876953730 | Ni           | 3.632403652  | 0.670039957   | 13.962342176  |
| C | -7.7098708484 | 14.0582425005 | 14.0902473082 | Ni           | 3.633003542  | 2.097778115   | 11.973704093  |
| C | 0.9927094885  | 0.4197235974  | 14.0899136139 | Ni           | 2.397784382  | 1.384291159   | 10.000000000  |
| C | -0.2505227028 | 1.1375762788  | 14.0911858808 | Ni           | 2.396753525  | 2.809901422   | 13.962557892  |
| C | 3.8228549930  | 8.4291048180  | 17.3720025834 | Ni           | 2.397458257  | 4.237792420   | 11.973520995  |
| O | 4.0866965379  | 9.7555303013  | 17.1784212723 | Ni           | 1.162063003  | 3.524514243   | 10.000000000  |
| C | 5.0672354846  | 7.6099132372  | 17.3627645114 | Ni           | 1.160102456  | 4.950625985   | 13.961352523  |
| O | 6.1802425864  | 8.3759264151  | 17.5620289932 | Ni           | 1.160609016  | 6.377920983   | 11.971311709  |
| C | 5.0741609206  | 6.2775710798  | 17.1679166182 | Ni           | -0.073658376 | 5.664737328   | 10.000000000  |
| H | 5.9856557645  | 5.6878965086  | 17.1906473430 | Ni           | -0.075825769 | 7.091889726   | 13.961978377  |
| H | 4.1437193346  | 5.7573944988  | 16.9628115820 | Ni           | -0.073997736 | 8.518360853   | 11.973136841  |
| C | 2.5932975031  | 7.9091645005  | 17.5521394444 | Ni           | -1.309379755 | 7.804960412   | 10.000000000  |
| H | 1.6939383845  | 8.5167617407  | 17.5141279942 | Ni           | -1.312614031 | 9.232028060   | 13.961163914  |
| H | 2.4767345281  | 6.8461210701  | 17.7393490521 | Ni           | -1.310135538 | 10.658591095  | 11.973245885  |
| C | 2.9901736910  | 10.6543781686 | 17.3506421153 | Ni           | -2.545101134 | 9.945183497   | 10.000000000  |
| C | 7.4307404187  | 7.6859527566  | 17.5848202255 | Ni           | -2.546956789 | 11.372126173  | 13.961888679  |
| H | 3.3887330815  | 11.6543938581 | 17.1490617236 | Ni           | -2.545540955 | 12.798934547  | 11.973377475  |
| H | 2.5986334286  | 10.5935644116 | 18.3796477160 | Ni           | -3.780822513 | 12.085406581  | 10.000000000  |

|    |              |              |              |    |              |              |              |
|----|--------------|--------------|--------------|----|--------------|--------------|--------------|
| Ni | -3.781940082 | 13.511873140 | 13.962154119 | Ni | -0.073938450 | 14.225467962 | 10.000000000 |
| Ni | -3.781265370 | 14.939196208 | 11.973871292 | Ni | 11.046254584 | 0.671025993  | 13.961844436 |
| Ni | -5.016543893 | 14.225629665 | 10.000000000 | Ni | 11.046459594 | 2.097620426  | 11.973338333 |
| Ni | 6.104240643  | 0.669882749  | 13.962203601 | Ni | 9.811692547  | 1.384048604  | 10.000000000 |
| Ni | 6.104540426  | 2.097912270  | 11.973590916 | Ni | 9.810068414  | 2.811267398  | 13.962702392 |
| Ni | 4.869087104  | 1.384210307  | 10.000000000 | Ni | 9.810254774  | 4.238034595  | 11.974454386 |
| Ni | 4.868252905  | 2.809119604  | 13.961485190 | Ni | 8.575971168  | 3.524271688  | 10.000000000 |
| Ni | 4.868725182  | 4.237786467  | 11.972414904 | Ni | 8.574706826  | 4.952288617  | 13.965049780 |
| Ni | 3.633365725  | 3.524433392  | 10.000000000 | Ni | 8.574978992  | 6.377535258  | 11.974123194 |
| Ni | 3.631865657  | 4.950520845  | 13.958518496 | Ni | 7.340249789  | 5.664494772  | 10.000000000 |
| Ni | 3.631353827  | 6.377720519  | 11.968747940 | Ni | 7.339221292  | 7.091636338  | 13.964014769 |
| Ni | 2.397644346  | 5.664656476  | 10.000000000 | Ni | 7.338636712  | 8.517789231  | 11.975545517 |
| Ni | 2.394281387  | 7.092256205  | 13.953825032 | Ni | 6.104528409  | 7.804717857  | 10.000000000 |
| Ni | 2.396513744  | 8.519393933  | 11.970923170 | Ni | 6.103317245  | 9.233549152  | 13.960380368 |
| Ni | 1.161922966  | 7.804879560  | 10.000000000 | Ni | 6.104268026  | 10.658851991 | 11.971205688 |
| Ni | 1.158070022  | 9.233081350  | 13.961803659 | Ni | 4.868807030  | 9.944940941  | 10.000000000 |
| Ni | 1.160798670  | 10.658197677 | 11.972931766 | Ni | 4.868623316  | 11.372275548 | 13.959732495 |
| Ni | -0.073798413 | 9.945102645  | 10.000000000 | Ni | 4.868111370  | 12.798726632 | 11.974020449 |
| Ni | -0.076482848 | 11.372618499 | 13.961722201 | Ni | 3.633085651  | 12.085164026 | 10.000000000 |
| Ni | -0.074070696 | 12.798647746 | 11.973662113 | Ni | 3.631937623  | 13.512674490 | 13.962727758 |
| Ni | -1.309519792 | 12.085325729 | 10.000000000 | Ni | 3.632533589  | 14.938765172 | 11.973325047 |
| Ni | -1.310284876 | 13.512199554 | 13.962351743 | Ni | 2.397364272  | 14.225387110 | 10.000000000 |
| Ni | -1.309929220 | 14.939016529 | 11.973494194 | Ni | 13.517578753 | 0.670831989  | 13.961670189 |
| Ni | -2.545241171 | 14.225548814 | 10.000000000 | Ni | 13.518084311 | 2.097587061  | 11.973294549 |
| Ni | 8.575140267  | 0.670610573  | 13.962495734 | Ni | 12.282995268 | 1.383967752  | 10.000000000 |
| Ni | 8.575159194  | 2.098014085  | 11.974112088 | Ni | 12.281690014 | 2.811042683  | 13.961904588 |
| Ni | 7.340389825  | 1.384129455  | 10.000000000 | Ni | 12.282096290 | 4.237522781  | 11.973422012 |
| Ni | 7.338876515  | 2.810779370  | 13.963457966 | Ni | 11.047273889 | 3.524190836  | 10.000000000 |
| Ni | 7.339147801  | 4.238311984  | 11.975037035 | Ni | 11.046062180 | 4.950955401  | 13.962760279 |
| Ni | 6.104668446  | 3.524352540  | 10.000000000 | Ni | 11.046433756 | 6.377597345  | 11.973753718 |
| Ni | 6.102918420  | 4.952221948  | 13.962938220 | Ni | 9.811552510  | 5.664413921  | 10.000000000 |
| Ni | 6.103630472  | 6.377948405  | 11.973405145 | Ni | 9.810357223  | 7.091091513  | 13.963276781 |
| Ni | 4.868947067  | 5.664575624  | 10.000000000 | Ni | 9.810315099  | 8.517536908  | 11.974446252 |
| Ni | 4.865252740  | 7.092576084  | 13.955019763 | Ni | 8.575831131  | 7.804637005  | 10.000000000 |
| Ni | 4.867551675  | 8.518360623  | 11.971773428 | Ni | 8.574353552  | 9.230822489  | 13.963788373 |
| Ni | 3.633225688  | 7.804798709  | 10.000000000 | Ni | 8.575378543  | 10.657645551 | 11.973549674 |
| Ni | 3.631108877  | 9.235217329  | 13.957372431 | Ni | 7.340109752  | 9.944860090  | 10.000000000 |
| Ni | 3.632198519  | 10.659004526 | 11.971248504 | Ni | 7.340006224  | 11.372265072 | 13.960422627 |
| Ni | 2.397504309  | 9.945021793  | 10.000000000 | Ni | 7.339143970  | 12.799020970 | 11.973302107 |
| Ni | 2.395627523  | 11.372691610 | 13.960516113 | Ni | 6.104388373  | 12.085083174 | 10.000000000 |
| Ni | 2.396966062  | 12.798970495 | 11.973738542 | Ni | 6.103009192  | 13.512236420 | 13.963064179 |
| Ni | 1.161782930  | 12.085244878 | 10.000000000 | Ni | 6.103576035  | 14.938704572 | 11.973468085 |
| Ni | 1.161173902  | 13.512147343 | 13.962383586 | Ni | 4.868666993  | 14.225306258 | 10.000000000 |
| Ni | 1.161009172  | 14.939113185 | 11.973499238 | Ni | 15.988817414 | 0.670619699  | 13.961925635 |

|    |              |              |              |   |              |              |              |
|----|--------------|--------------|--------------|---|--------------|--------------|--------------|
| Ni | 15.989582526 | 2.097259732  | 11.973270840 | C | -2.547795808 | 11.370255332 | 16.101589138 |
| Ni | 14.754297990 | 1.383886900  | 10.000000000 | C | -3.783605087 | 12.083804154 | 16.101601028 |
| Ni | 14.753299008 | 2.810796605  | 13.962009381 | C | -3.783736559 | 13.510874441 | 16.101809497 |
| Ni | 14.754030153 | 4.237669132  | 11.973672649 | C | -5.019470396 | 14.224409714 | 16.102319556 |
| Ni | 13.518576611 | 3.524109985  | 10.000000000 | C | 6.101610814  | 0.669744899  | 16.103824654 |
| Ni | 13.517346630 | 4.950825008  | 13.962104749 | C | 4.866063667  | 1.383494038  | 16.105382679 |
| Ni | 13.517994475 | 6.377847473  | 11.973763391 | C | 4.865788149  | 2.810344812  | 16.099911631 |
| Ni | 12.282855232 | 5.664333069  | 10.000000000 | C | 3.630358967  | 3.523502454  | 16.100174324 |
| Ni | 12.281265253 | 7.090584885  | 13.962636790 | C | 3.629809311  | 4.949745218  | 16.081246374 |
| Ni | 12.281903076 | 8.517806492  | 11.973462608 | C | 2.394555148  | 5.663040638  | 16.083494943 |
| Ni | 11.047133852 | 7.804556153  | 10.000000000 | C | 2.394185983  | 7.088934331  | 16.064722773 |
| Ni | 11.045379987 | 9.230241978  | 13.962965696 | C | 1.159046351  | 7.802658098  | 16.077743705 |
| Ni | 11.046257603 | 10.657836192 | 11.974057267 | C | 1.159006406  | 9.229243225  | 16.084927438 |
| Ni | 9.811412473  | 9.944779238  | 10.000000000 | C | -0.076043860 | 9.942653456  | 16.098806982 |
| Ni | 9.809949612  | 11.370706476 | 13.962443810 | C | -0.076349857 | 11.369649893 | 16.101377745 |
| Ni | 9.810666996  | 12.798301357 | 11.973579225 | C | -1.312041748 | 12.083397223 | 16.102629506 |
| Ni | 8.575691094  | 12.085002322 | 10.000000000 | C | -1.312432453 | 13.510474240 | 16.101957086 |
| Ni | 8.574104642  | 13.511836111 | 13.961816469 | C | -2.548138078 | 14.224251058 | 16.103660660 |
| Ni | 8.575199729  | 14.938700196 | 11.973343160 | C | 8.572826948  | 0.669411413  | 16.101967831 |
| Ni | 7.339969715  | 14.225225407 | 10.000000000 | C | 7.337107855  | 1.383251184  | 16.104530552 |
| C  | 1.159215875  | 0.669892753  | 16.101825573 | C | 7.336759487  | 2.809990790  | 16.101384801 |
| C  | -0.076434299 | 1.383264858  | 16.102619619 | C | 6.101231209  | 3.523671794  | 16.093921181 |
| C  | -0.076216928 | 2.810224351  | 16.103323457 | C | 6.101420707  | 4.949625685  | 16.080335440 |
| C  | -1.312019581 | 3.523596752  | 16.103950313 | C | 4.865485461  | 5.662150869  | 16.062495319 |
| C  | -1.311781920 | 4.950392927  | 16.104172553 | C | 4.865968568  | 7.089761578  | 16.071137079 |
| C  | -2.547614022 | 5.663568737  | 16.104609956 | C | 3.630026038  | 7.801772187  | 16.066928072 |
| C  | -2.547500343 | 7.090318413  | 16.103572531 | C | 3.629651683  | 9.229442889  | 16.073767665 |
| C  | -3.783507558 | 7.803539761  | 16.102733472 | C | 2.394222143  | 9.942677499  | 16.085839810 |
| C  | -3.783493324 | 9.230349951  | 16.101662251 | C | 2.394526124  | 11.369707573 | 16.101941124 |
| C  | -5.019580634 | 9.943539660  | 16.101685438 | C | 1.159015183  | 12.083148733 | 16.104853728 |
| C  | -5.019428137 | 11.370534335 | 16.100253684 | C | 1.158852168  | 13.510070683 | 16.103020149 |
| C  | -6.255429256 | 12.083878087 | 16.100659034 | C | -0.076915081 | 14.223850344 | 16.102506345 |
| C  | -6.255235388 | 13.510913154 | 16.100173771 | C | 11.044183297 | 0.669065280  | 16.100245715 |
| C  | -7.490953757 | 14.224341548 | 16.101183956 | C | 9.808313641  | 1.382783276  | 16.101187649 |
| C  | 3.630543158  | 0.669929466  | 16.103546416 | C | 9.807918260  | 2.809841069  | 16.101206226 |
| C  | 2.394873566  | 1.383424794  | 16.104808861 | C | 8.572109172  | 3.523522782  | 16.103030713 |
| C  | 2.394947787  | 2.810326593  | 16.104383007 | C | 8.571583572  | 4.950163271  | 16.103694009 |
| C  | 1.159380873  | 3.523688626  | 16.105180385 | C | 7.335977978  | 5.663624777  | 16.099567742 |
| C  | 1.159332642  | 4.950300872  | 16.099434582 | C | 7.335821389  | 7.089433984  | 16.109768452 |
| C  | -0.076037936 | 5.663693303  | 16.102025448 | C | 6.100733022  | 7.802388514  | 16.112926788 |
| C  | -0.076112525 | 7.089991436  | 16.094794361 | C | 6.101316094  | 9.229189978  | 16.091758160 |
| C  | -1.311653568 | 7.803320183  | 16.102864839 | C | 4.866525579  | 9.943032477  | 16.079818683 |
| C  | -1.311811666 | 9.229918490  | 16.101470339 | C | 4.865649537  | 11.370353112 | 16.099147722 |
| C  | -2.547545010 | 9.943330489  | 16.103334814 | C | 3.629797592  | 12.083182973 | 16.108436885 |



|               |              |              |               |    |              |              |              |
|---------------|--------------|--------------|---------------|----|--------------|--------------|--------------|
| C             | 3.629933060  | 13.509952602 | 16.106478582  | Ni | -0.073356389 | 4.238184302  | 11.974328255 |
| C             | 2.394318450  | 14.223574079 | 16.104116033  | Ni | -1.309056425 | 3.524736395  | 10.000000000 |
| C             | 13.515583760 | 0.668945196  | 16.100489199  | Ni | -1.309218338 | 4.951365902  | 13.963361323 |
| C             | 12.279806332 | 1.382537103  | 16.100357844  | Ni | -1.308471832 | 6.378496177  | 11.974878529 |
| C             | 12.279701632 | 2.809594951  | 16.100195067  | Ni | -2.544668376 | 5.665021641  | 10.000000000 |
| C             | 11.043778094 | 3.523029531  | 16.101785299  | Ni | -2.544739088 | 7.091056911  | 13.964166570 |
| C             | 11.043421654 | 4.949854495  | 16.102478660  | Ni | -2.544607732 | 8.518250652  | 11.974440296 |
| C             | 9.807319421  | 5.663063491  | 16.106875156  | Ni | -3.780280328 | 7.805306886  | 10.000000000 |
| C             | 9.807185898  | 7.089746878  | 16.107482681  | Ni | -3.780455557 | 9.230296854  | 13.964272609 |
| C             | 8.571332355  | 7.802505270  | 16.115701496  | Ni | -3.780486835 | 10.658151112 | 11.974047879 |
| C             | 8.572075155  | 9.229358939  | 16.112065604  | Ni | -5.015892280 | 9.945592132  | 10.000000000 |
| C             | 7.336471134  | 9.942835863  | 16.106422247  | Ni | -5.016406247 | 11.371007982 | 13.961948011 |
| C             | 7.336618206  | 11.369822188 | 16.104018838  | Ni | -5.016545423 | 12.798749602 | 11.972183574 |
| C             | 6.101198026  | 12.083430229 | 16.105796119  | Ni | -6.251504231 | 12.085877378 | 10.000000000 |
| C             | 6.101231206  | 13.510261268 | 16.104694173  | Ni | -6.252616910 | 13.512173405 | 13.961010280 |
| C             | 4.865455855  | 14.223548021 | 16.104705937  | Ni | -6.252412705 | 14.939534483 | 11.972925068 |
| C             | 15.986951226 | 0.669095339  | 16.101418052  | Ni | -7.487116183 | 14.226162624 | 10.000000000 |
| C             | 14.751244683 | 1.382530142  | 16.101449851  | Ni | 3.632444913  | 0.670255540  | 13.961147338 |
| C             | 14.751348995 | 2.809562059  | 16.101462798  | Ni | 3.632970595  | 2.098073056  | 11.973583762 |
| C             | 13.515518794 | 3.522847799  | 16.102418676  | Ni | 2.397868748  | 1.384502850  | 10.000000000 |
| C             | 13.515555279 | 4.949768310  | 16.102310796  | Ni | 2.396920500  | 2.810066889  | 13.962981583 |
| C             | 12.279521473 | 5.662953692  | 16.102472615  | Ni | 2.397980699  | 4.238353525  | 11.974499417 |
| C             | 12.279531357 | 7.089773891  | 16.100998033  | Ni | 1.162256796  | 3.524788095  | 10.000000000 |
| C             | 11.043290165 | 7.802947587  | 16.103625315  | Ni | 1.161824501  | 4.950195115  | 13.962842340 |
| C             | 11.043580615 | 9.229807516  | 16.103766396  | Ni | 1.162540898  | 6.378522737  | 11.973489754 |
| C             | 9.807594524  | 9.942803443  | 16.109019284  | Ni | -0.073355155 | 5.665073341  | 10.000000000 |
| C             | 9.807886817  | 11.369757920 | 16.103204907  | Ni | -0.073665362 | 7.091112823  | 13.963224722 |
| C             | 8.572319437  | 12.083324764 | 16.104660413  | Ni | -0.073337936 | 8.518431455  | 11.973914564 |
| C             | 8.572397392  | 13.510194093 | 16.101795175  | Ni | -1.308967107 | 7.805358587  | 10.000000000 |
| C             | 7.336765295  | 14.223746045 | 16.103803019  | Ni | -1.310226092 | 9.231115322  | 13.962943297 |
| C             | 5.191399183  | 6.727081341  | 19.046528797  | Ni | -1.309159516 | 10.658298130 | 11.973662474 |
| C             | 5.466177085  | 8.166296547  | 19.075530333  | Ni | -2.544579059 | 9.945643833  | 10.000000000 |
| C             | 4.283570775  | 8.829762517  | 19.066069126  | Ni | -2.545358183 | 11.371280078 | 13.961910453 |
| C             | 3.198795655  | 7.847087003  | 19.031584114  | Ni | -2.544501260 | 12.798695315 | 11.973068477 |
| H             | 6.476224502  | 8.563729217  | 19.101921009  | Ni | -3.780191010 | 12.085929078 | 10.000000000 |
| H             | 4.096492793  | 9.899444778  | 19.078522056  | Ni | -3.780776797 | 13.511808716 | 13.959724092 |
| O             | 5.942339621  | 5.771648830  | 19.026651952  | Ni | -3.780177326 | 14.939780549 | 11.973092704 |
| O             | 1.991501617  | 7.990156195  | 19.004150202  | Ni | -5.015802962 | 14.226214324 | 10.000000000 |
| O             | 3.788386997  | 6.561265647  | 19.0232323290 | Ni | 6.105051437  | 0.670125147  | 13.963264981 |
| INT-G/Ni-DMBD |              |              |               | Ni | 6.104855177  | 2.097745387  | 11.974285903 |
| Ni            | 1.160953576  | 0.670639766  | 13.962977186  | Ni | 4.869181969  | 1.384554550  | 10.000000000 |
| Ni            | 1.161684135  | 2.097846826  | 11.974112826  | Ni | 4.868914454  | 2.808092156  | 13.961744393 |
| Ni            | -0.073444473 | 1.384451149  | 10.000000000  | Ni | 4.869194142  | 4.237592937  | 11.972509515 |
| Ni            | -0.074059700 | 2.811021875  | 13.963186695  | Ni | 3.633570017  | 3.524839796  | 10.000000000 |

|    |              |              |              |    |              |              |              |
|----|--------------|--------------|--------------|----|--------------|--------------|--------------|
| Ni | 3.634042597  | 4.948330834  | 13.961603295 | Ni | 7.340584507  | 5.665228443  | 10.000000000 |
| Ni | 3.634002455  | 6.378285586  | 11.971636216 | Ni | 7.340822537  | 7.092203468  | 13.957220779 |
| Ni | 2.397958065  | 5.665125042  | 10.000000000 | Ni | 7.339884342  | 8.519240659  | 11.971933497 |
| Ni | 2.396705058  | 7.090443218  | 13.957749049 | Ni | 6.104972555  | 7.805513688  | 10.000000000 |
| Ni | 2.398261496  | 8.518575112  | 11.970860563 | Ni | 6.105879171  | 9.233331050  | 13.960285043 |
| Ni | 1.162346114  | 7.805410287  | 10.000000000 | Ni | 6.105210513  | 10.658802143 | 11.973378509 |
| Ni | 1.159795788  | 9.232498765  | 13.959296503 | Ni | 4.869360604  | 9.945798934  | 10.000000000 |
| Ni | 1.162006554  | 10.658899294 | 11.972034797 | Ni | 4.870351032  | 11.372444497 | 13.961467824 |
| Ni | -0.073265838 | 9.945695533  | 10.000000000 | Ni | 4.869458254  | 12.798450409 | 11.973948156 |
| Ni | -0.075531366 | 11.372980547 | 13.960605233 | Ni | 3.633748652  | 12.086084180 | 10.000000000 |
| Ni | -0.073406891 | 12.799879178 | 11.973361927 | Ni | 3.634027927  | 13.512101728 | 13.962332623 |
| Ni | -1.308877790 | 12.085980779 | 10.000000000 | Ni | 3.633441113  | 14.939140296 | 11.974033467 |
| Ni | -1.309236291 | 13.512642386 | 13.962441277 | Ni | 2.398136700  | 14.226369426 | 10.000000000 |
| Ni | -1.308527864 | 14.940086894 | 11.974374707 | Ni | 13.518226567 | 0.670005357  | 13.961592417 |
| Ni | -2.544489741 | 14.226266025 | 10.000000000 | Ni | 13.518603217 | 2.097461718  | 11.972637387 |
| Ni | 8.576144954  | 0.670801266  | 13.964799188 | Ni | 12.283121631 | 1.384709651  | 10.000000000 |
| Ni | 8.576075891  | 2.097860004  | 11.975107467 | Ni | 12.282342418 | 2.810800672  | 13.960632108 |
| Ni | 7.340495189  | 1.384606250  | 10.000000000 | Ni | 12.282502070 | 4.238450927  | 11.973258294 |
| Ni | 7.340703765  | 2.809627172  | 13.963840675 | Ni | 11.047509679 | 3.524994897  | 10.000000000 |
| Ni | 7.339683184  | 4.237970021  | 11.973569547 | Ni | 11.046726266 | 4.951213383  | 13.963472675 |
| Ni | 6.104883238  | 3.524891496  | 10.000000000 | Ni | 11.046867590 | 6.378573358  | 11.974581266 |
| Ni | 6.104425308  | 4.948844134  | 13.960047344 | Ni | 9.811897728  | 5.665280143  | 10.000000000 |
| Ni | 6.103723847  | 6.378970394  | 11.971786404 | Ni | 9.811740132  | 7.091663121  | 13.962172105 |
| Ni | 4.869271286  | 5.665176742  | 10.000000000 | Ni | 9.811651985  | 8.518749736  | 11.973931907 |
| Ni | 4.867919394  | 7.090779447  | 13.957032687 | Ni | 8.576285776  | 7.805565389  | 10.000000000 |
| Ni | 4.869044819  | 8.518878577  | 11.971514438 | Ni | 8.578362693  | 9.232587225  | 13.961938531 |
| Ni | 3.633659334  | 7.805461988  | 10.000000000 | Ni | 8.575845005  | 10.658854115 | 11.975155870 |
| Ni | 3.631657205  | 9.232307357  | 13.957312824 | Ni | 7.340673824  | 9.945850635  | 10.000000000 |
| Ni | 3.634235203  | 10.658332992 | 11.971845010 | Ni | 7.342378778  | 11.373178010 | 13.964639342 |
| Ni | 2.398047383  | 9.945747234  | 10.000000000 | Ni | 7.340123607  | 12.798514370 | 11.975528780 |
| Ni | 2.396523270  | 11.373029217 | 13.957640371 | Ni | 6.105061873  | 12.086135880 | 10.000000000 |
| Ni | 2.398193768  | 12.799040531 | 11.972926195 | Ni | 6.105283126  | 13.512336161 | 13.963785800 |
| Ni | 1.162435431  | 12.086032479 | 10.000000000 | Ni | 6.104687776  | 14.938984667 | 11.974056268 |
| Ni | 1.161745104  | 13.512980845 | 13.962386717 | Ni | 4.869449921  | 14.226421126 | 10.000000000 |
| Ni | 1.162372951  | 14.939560868 | 11.974412090 | Ni | 15.989441178 | 0.670602494  | 13.962887464 |
| Ni | -0.073176521 | 14.226317725 | 10.000000000 | Ni | 15.990099721 | 2.097849634  | 11.973008164 |
| Ni | 11.047073455 | 0.670472675  | 13.963545408 | Ni | 14.754434852 | 1.384761352  | 10.000000000 |
| Ni | 11.046783627 | 2.097389728  | 11.973612732 | Ni | 14.754397157 | 2.811024412  | 13.960219228 |
| Ni | 9.811808410  | 1.384657951  | 10.000000000 | Ni | 14.754570699 | 4.238451045  | 11.972599878 |
| Ni | 9.811147146  | 2.810606955  | 13.963775547 | Ni | 13.518822900 | 3.525046598  | 10.000000000 |
| Ni | 9.811548252  | 4.238150046  | 11.974452699 | Ni | 13.518583830 | 4.951456403  | 13.961165927 |
| Ni | 8.576196459  | 3.524943197  | 10.000000000 | Ni | 13.518648520 | 6.378593700  | 11.973844127 |
| Ni | 8.575340858  | 4.950371836  | 13.961754508 | Ni | 12.283210948 | 5.665331843  | 10.000000000 |
| Ni | 8.575550642  | 6.378630042  | 11.972714649 | Ni | 12.282930032 | 7.091517924  | 13.963471390 |

|    |              |              |              |   |              |              |              |
|----|--------------|--------------|--------------|---|--------------|--------------|--------------|
| Ni | 12.283091371 | 8.518344061  | 11.974269726 | C | 2.397646556  | 5.662546158  | 16.103124686 |
| Ni | 11.047598997 | 7.805617089  | 10.000000000 | C | 2.397626894  | 7.088700259  | 16.082538677 |
| Ni | 11.048587875 | 9.231781943  | 13.963447888 | C | 1.162669236  | 7.801649364  | 16.098375293 |
| Ni | 11.046865473 | 10.658886092 | 11.973976763 | C | 1.162450825  | 9.228215879  | 16.094243520 |
| Ni | 9.811987045  | 9.945902335  | 10.000000000 | C | -0.073082981 | 9.942087809  | 16.108679507 |
| Ni | 9.812541740  | 11.372283897 | 13.964087988 | C | -0.073096149 | 11.368880534 | 16.104237878 |
| Ni | 9.811153502  | 12.799302311 | 11.973834423 | C | -1.308978603 | 12.082625515 | 16.103677188 |
| Ni | 8.576375093  | 12.086187581 | 10.000000000 | C | -1.308960557 | 13.509681474 | 16.102392909 |
| Ni | 8.575740345  | 13.512619056 | 13.964899175 | C | -2.544771379 | 14.223350227 | 16.099041319 |
| Ni | 8.575856512  | 14.939525297 | 11.973972954 | C | 8.575453590  | 0.668142571  | 16.111301173 |
| Ni | 7.340763142  | 14.226472827 | 10.000000000 | C | 7.340044359  | 1.381803260  | 16.112720175 |
| C  | 1.161472813  | 0.668165968  | 16.105366679 | C | 7.339533266  | 2.808637805  | 16.112171053 |
| C  | -0.074113137 | 1.381607914  | 16.107809511 | C | 6.104054049  | 3.521945602  | 16.110235573 |
| C  | -0.073746190 | 2.808581061  | 16.106729631 | C | 6.103616780  | 4.948653762  | 16.093517447 |
| C  | -1.309346611 | 3.522000183  | 16.102893928 | C | 4.868580777  | 5.661902478  | 16.078569500 |
| C  | -1.309220555 | 4.949017192  | 16.104028245 | C | 4.868580450  | 7.088948745  | 16.064793756 |
| C  | -2.544929337 | 5.662428866  | 16.103833855 | C | 3.633382467  | 7.801960130  | 16.064708039 |
| C  | -2.544855348 | 7.089321237  | 16.108259112 | C | 3.634229312  | 9.228724489  | 16.070263772 |
| C  | -3.780760324 | 7.802404585  | 16.111242440 | C | 2.398278343  | 9.941479491  | 16.076097104 |
| C  | -3.780685265 | 9.229127039  | 16.108359024 | C | 2.398218307  | 11.369551563 | 16.083424535 |
| C  | -5.016619880 | 9.942366926  | 16.108778375 | C | 1.162345348  | 12.082829872 | 16.101364152 |
| C  | -5.016647459 | 11.369136780 | 16.100270466 | C | 1.162125466  | 13.509761508 | 16.107989320 |
| C  | -6.252554557 | 12.082575486 | 16.101682006 | C | -0.073453274 | 14.223332090 | 16.110848181 |
| C  | -6.252411829 | 13.509654333 | 16.098019434 | C | 11.046659924 | 0.667969519  | 16.105176871 |
| C  | -7.488145336 | 14.223138309 | 16.105000374 | C | 9.811047690  | 1.381648506  | 16.110632841 |
| C  | 3.632817394  | 0.668318562  | 16.099438199 | C | 9.810782026  | 2.808593330  | 16.107393409 |
| C  | 2.397144420  | 1.381883377  | 16.105196009 | C | 8.575117785  | 3.522023404  | 16.112741628 |
| C  | 2.397357117  | 2.808807958  | 16.108396079 | C | 8.575017313  | 4.948922848  | 16.105465717 |
| C  | 1.161897154  | 3.522235364  | 16.111653274 | C | 7.339060322  | 5.662148699  | 16.094807404 |
| C  | 1.162187281  | 4.949139835  | 16.110027709 | C | 7.338974545  | 7.089242885  | 16.079190117 |
| C  | -0.073387209 | 5.662349055  | 16.110800128 | C | 6.103455034  | 7.803177303  | 16.069776808 |
| C  | -0.073233950 | 7.089040716  | 16.109021302 | C | 6.104140017  | 9.229860836  | 16.083672034 |
| C  | -1.308903744 | 7.802269736  | 16.112840755 | C | 4.869249429  | 9.942652464  | 16.082365009 |
| C  | -1.308853449 | 9.229016991  | 16.109867053 | C | 4.869323731  | 11.368995302 | 16.098982007 |
| C  | -2.544731435 | 9.942266487  | 16.108416898 | C | 3.633924676  | 12.082480910 | 16.098089317 |
| C  | -2.544628065 | 11.369193883 | 16.101280942 | C | 3.633316654  | 13.509515873 | 16.105644778 |
| C  | -3.780660760 | 12.082613299 | 16.096288166 | C | 2.397679114  | 14.222997318 | 16.109755945 |
| C  | -3.780649240 | 13.509733627 | 16.093895600 | C | 13.518141411 | 0.667936564  | 16.099757207 |
| C  | -5.016533660 | 14.223314389 | 16.094672605 | C | 12.282342754 | 1.381519359  | 16.098916926 |
| C  | 6.104318362  | 0.668325347  | 16.103231173 | C | 12.282358320 | 2.808759297  | 16.096050920 |
| C  | 4.868631636  | 1.381845313  | 16.103696535 | C | 11.046500596 | 3.522293318  | 16.102289154 |
| C  | 4.868473014  | 2.808776500  | 16.106798710 | C | 11.046548431 | 4.949186325  | 16.103271117 |
| C  | 3.633008647  | 3.522223959  | 16.109107910 | C | 9.810727705  | 5.662577005  | 16.106355027 |
| C  | 3.633009703  | 4.948937348  | 16.096822426 | C | 9.811002258  | 7.089438580  | 16.103508754 |

|             |               |              |               |    |               |               |               |
|-------------|---------------|--------------|---------------|----|---------------|---------------|---------------|
| C           | 8.575450930   | 7.803245071  | 16.090877684  | Cu | 1.0206139004  | 4.7513872494  | 8.8553537117  |
| C           | 8.574873560   | 9.229901587  | 16.104107347  | Cu | -0.2210765900 | 4.0311644830  | 6.7507590000  |
| C           | 7.339265404   | 9.942968216  | 16.105364267  | Cu | -1.4626128922 | 7.6245695123  | 10.9696494742 |
| C           | 7.339497993   | 11.369270043 | 16.112517365  | Cu | -0.2187100817 | 6.9065146999  | 8.8619625717  |
| C           | 6.104326041   | 12.082437154 | 16.113827330  | Cu | -1.4641939340 | 6.1846582540  | 6.7507590000  |
| C           | 6.104414125   | 13.509280716 | 16.109525540  | Cu | -2.7079404687 | 9.7762122826  | 10.9715205164 |
| C           | 4.868930017   | 14.222845447 | 16.107120890  | Cu | -1.4642632717 | 9.0579021486  | 8.8622066916  |
| C           | 15.989538679  | 0.668115422  | 16.104274008  | Cu | -2.7073112780 | 8.3381520250  | 6.7507590000  |
| C           | 14.753776043  | 1.381588085  | 16.098901622  | Cu | -3.9520828059 | 11.9289690023 | 10.9704662565 |
| C           | 14.754026029  | 2.808860058  | 16.096381764  | Cu | -2.7085097566 | 11.2099953167 | 8.8642597863  |
| C           | 13.518256514  | 3.522296861  | 16.095140223  | Cu | -3.9504286210 | 10.4916457970 | 6.7507590000  |
| C           | 13.518321719  | 4.949449021  | 16.098068987  | Cu | -5.1948157688 | 14.0827200657 | 10.9693648497 |
| C           | 12.282415540  | 5.662799090  | 16.102992356  | Cu | -3.9510865722 | 13.3639590772 | 8.8652945957  |
| C           | 12.282585659  | 7.089613261  | 16.107895488  | Cu | -5.1935459650 | 12.6451395680 | 6.7507590000  |
| C           | 11.046857276  | 7.802889586  | 16.110595725  | Cu | 2.2623439348  | 1.1619962559  | 10.9629815453 |
| C           | 11.046629080  | 9.229543845  | 16.109785927  | Cu | 3.5074437743  | 0.4436665848  | 8.8618942842  |
| C           | 9.810922097   | 9.942911863  | 16.112732350  | Cu | -6.4366633090 | 14.7986333390 | 6.7507590000  |
| C           | 9.810795774   | 11.369517090 | 16.108373802  | Cu | 3.5075217759  | 3.3147502968  | 10.9552158218 |
| C           | 8.575141977   | 12.082818076 | 16.112807131  | Cu | 4.7537615457  | 2.5965430067  | 8.8596829933  |
| C           | 8.575512085   | 13.509755919 | 16.108120111  | Cu | 3.5084144450  | 1.8777509600  | 6.7507590000  |
| C           | 7.339856772   | 14.223156549 | 16.110066526  | Cu | 2.2624482618  | 5.4660568235  | 10.9481571907 |
| C           | 3.804416687   | 8.427040555  | 19.274814620  | Cu | 3.5106715691  | 4.7520027486  | 8.8561244451  |
| O           | 4.092088619   | 9.762463672  | 19.238691475  | Cu | 2.2652971010  | 4.0312447310  | 6.7507590000  |
| C           | 5.047597301   | 7.599478352  | 19.286102963  | Cu | 1.0224640743  | 7.6264740037  | 10.9697878238 |
| O           | 6.168648110   | 8.380372935  | 19.303045207  | Cu | 2.2684021019  | 6.9085880898  | 8.8695001564  |
| C           | 5.060448068   | 6.252194351  | 19.283514892  | Cu | 1.0221797570  | 6.1847385020  | 6.7507590000  |
| H           | 5.985168745   | 5.683260606  | 19.301614178  | Cu | -0.2219887695 | 9.7780147413  | 10.9718262916 |
| H           | 4.130748696   | 5.692750688  | 19.263696429  | Cu | 1.0231007278  | 9.0616223666  | 8.8697504306  |
| C           | 2.557644808   | 7.916742065  | 19.307301832  | Cu | -0.2209375870 | 8.3382322730  | 6.7507590000  |
| H           | 1.672804599   | 8.546502959  | 19.307025254  | Cu | -1.4645715342 | 11.9298198409 | 10.9707394181 |
| H           | 2.405118617   | 6.842366992  | 19.335400926  | Cu | -0.2240028134 | 11.2121935953 | 8.8619962781  |
| C           | 2.990781111   | 10.658110175 | 19.391366635  | Cu | -1.4640549310 | 10.4917260440 | 6.7507590000  |
| C           | 7.418737425   | 7.706874465  | 19.451708766  | Cu | -2.7079304112 | 14.0839524523 | 10.9705585634 |
| H           | 3.412398734   | 11.666492236 | 19.318004648  | Cu | -1.4645108186 | 13.3650468098 | 8.8640258143  |
| H           | 2.506829086   | 10.512968520 | 20.371842679  | Cu | -2.7071722750 | 12.6452198150 | 6.7507590000  |
| H           | 2.243955888   | 10.512265248 | 18.594791160  | Cu | 4.7507733789  | 1.1626834727  | 10.9657723994 |
| H           | 8.184403188   | 8.490666083  | 19.446022016  | Cu | 5.9951888756  | 0.4427596186  | 8.8621154077  |
| H           | 7.596689528   | 7.007474037  | 18.618960932  | Cu | -3.9502896180 | 14.7987135870 | 6.7507590000  |
| H           | 7.448125938   | 7.148933314  | 20.402512375  | Cu | 5.9985200707  | 3.3148069529  | 10.9665765277 |
| TS-G/Cu-MAH |               |              |               | Cu | 7.2403840672  | 2.5951553230  | 8.8616259040  |
| Cu          | 1.0179885179  | 3.3144115204 | 10.9578934269 | Cu | 5.9947881360  | 1.8778312070  | 6.7507590000  |
| Cu          | 2.2637290607  | 2.5978862011 | 8.8579272775  | Cu | 4.7555524729  | 5.4663705998  | 10.9597909361 |
| Cu          | 1.0220407540  | 1.8776707120 | 6.7507590000  | Cu | 5.9972766535  | 4.7508289980  | 8.8611321124  |
| Cu          | -0.2234671308 | 5.4709454793 | 10.9604713364 | Cu | 4.7516707920  | 4.0313249780  | 6.7507590000  |

|                  |               |               |                  |               |               |
|------------------|---------------|---------------|------------------|---------------|---------------|
| Cu 3.5131500471  | 7.6256649302  | 11.0123465083 | Cu 8.4813008300  | 6.1849792450  | 6.7507590000  |
| Cu 4.7482817186  | 6.9100309929  | 8.8762074177  | Cu 7.2428194724  | 9.7745050143  | 10.9592381640 |
| Cu 3.5085534480  | 6.1848187500  | 6.7507590000  | Cu 8.4826690856  | 9.0550520009  | 8.8606759081  |
| Cu 2.2655009028  | 9.7772796468  | 11.0195388639 | Cu 7.2381834860  | 8.3384730160  | 6.7507590000  |
| Cu 3.5061087576  | 9.0596361818  | 8.8944152162  | Cu 5.9964926405  | 11.9355565013 | 10.9457735953 |
| Cu 2.2654361040  | 8.3383125210  | 6.7507590000  | Cu 7.2382213049  | 11.2077395828 | 8.8555844961  |
| Cu 1.0205840762  | 11.9300295361 | 10.9721013441 | Cu 5.9950661420  | 10.4919667870 | 6.7507590000  |
| Cu 2.2617371958  | 11.2075543347 | 8.8686450506  | Cu 4.7480147309  | 14.0831194816 | 10.9604764438 |
| Cu 1.0223187600  | 10.4918062920 | 6.7507590000  | Cu 5.9935381807  | 13.3653226239 | 8.8539537606  |
| Cu -0.2207360142 | 14.0828423083 | 10.9713978557 | Cu 4.7519487980  | 12.6454605580 | 6.7507590000  |
| Cu 1.0215848014  | 13.3635607923 | 8.8619586599  | Cu 12.2083543998 | 1.1616537848  | 10.9702014454 |
| Cu -0.2207985840 | 12.6453000630 | 6.7507590000  | Cu 13.4516251262 | 0.4446204736  | 8.8609098006  |
| Cu 7.2392650099  | 1.1612201212  | 10.9702761702 | Cu 3.5088314540  | 14.7989543290 | 6.7507590000  |
| Cu 8.4820881364  | 0.4425454141  | 8.8629716168  | Cu 13.4512253540 | 3.3162184893  | 10.9720179946 |
| Cu -1.4639159280 | 14.7987938340 | 6.7507590000  | Cu 14.6937172849 | 2.5993272074  | 8.8617716284  |
| Cu 8.4813727504  | 3.3160095580  | 10.9722673938 | Cu 13.4539092080 | 1.8780719500  | 6.7507590000  |
| Cu 9.7240920752  | 2.5976327076  | 8.8643295826  | Cu 12.2088469161 | 5.4706489651  | 10.9730129955 |
| Cu 8.4811618270  | 1.8779114550  | 6.7507590000  | Cu 13.4519529073 | 4.7519121340  | 8.8655216999  |
| Cu 7.2386770750  | 5.4701827428  | 10.9812144979 | Cu 12.2107918650 | 4.0315657210  | 6.7507590000  |
| Cu 8.4795363105  | 4.7522805797  | 8.8661457799  | Cu 10.9662785376 | 7.6224016781  | 10.9721594702 |
| Cu 7.2380444830  | 4.0314052260  | 6.7507590000  | Cu 12.2102262791 | 6.9038263096  | 8.8643095040  |
| Cu 6.0032813219  | 7.6187563422  | 10.9939132558 | Cu 10.9676745210 | 6.1850594920  | 6.7507590000  |
| Cu 7.2351762873  | 6.9061367636  | 8.8688896377  | Cu 9.7269181505  | 9.7735403692  | 10.9669313783 |
| Cu 5.9949271390  | 6.1848989970  | 6.7507590000  | Cu 10.9707651525 | 9.0559142484  | 8.8614063782  |
| Cu 4.7508987410  | 9.7716945914  | 11.0275105217 | Cu 9.7245571770  | 8.3385532640  | 6.7507590000  |
| Cu 5.9870616851  | 9.0580198288  | 8.8785182625  | Cu 8.4809128573  | 11.9302215828 | 10.9544261081 |
| Cu 4.7518097950  | 8.3383927680  | 6.7507590000  | Cu 9.7260830739  | 11.2086128592 | 8.8593244425  |
| Cu 3.5053244365  | 11.9275520310 | 10.9685577512 | Cu 8.4814398330  | 10.4920470350 | 6.7507590000  |
| Cu 4.7497215693  | 11.2044842209 | 8.8715664927  | Cu 7.2365817002  | 14.0870137808 | 10.9568348703 |
| Cu 3.5086924510  | 10.4918865390 | 6.7507590000  | Cu 8.4796966625  | 13.3647835966 | 8.8574245522  |
| Cu 2.2651911754  | 14.0794582792 | 10.9703557787 | Cu 7.2383224890  | 12.6455408060 | 6.7507590000  |
| Cu 3.5078828946  | 13.3604248844 | 8.8609908972  | Cu 14.6933975953 | 1.1630642633  | 10.9650434910 |
| Cu 2.2655751070  | 12.6453803110 | 6.7507590000  | Cu 15.9375164273 | 0.4464412137  | 8.8584549431  |
| Cu 9.7245040506  | 1.1606020433  | 10.9708173485 | Cu 5.9952051450  | 14.7990345770 | 6.7507590000  |
| Cu 10.9672991161 | 0.4423639612  | 8.8637154423  | Cu -1.4679706975 | 3.3164052998  | 10.9652780489 |
| Cu 1.0224577630  | 14.7988740820 | 6.7507590000  | Cu -0.2248840303 | 2.5980491131  | 8.8588866789  |
| Cu 10.9649862534 | 3.3153268238  | 10.9731391454 | Cu 15.9402828990 | 1.8781521980  | 6.7507590000  |
| Cu 12.2087101921 | 2.5985197511  | 8.8655135254  | Cu -2.7091305640 | 5.4699268600  | 10.9702031898 |
| Cu 10.9675355180 | 1.8779917030  | 6.7507590000  | Cu -1.4662775575 | 4.7519013122  | 8.8610972496  |
| Cu 9.7225081652  | 5.4700538005  | 10.9746368709 | Cu 14.6971655550 | 4.0316459690  | 6.7507590000  |
| Cu 10.9647500640 | 4.7522611553  | 8.8656211540  | Cu -3.9505382123 | 7.6224286889  | 10.9708579707 |
| Cu 9.7244181740  | 4.0314854740  | 6.7507590000  | Cu -2.7068314190 | 6.9041307259  | 8.8639789082  |
| Cu 8.4808618296  | 7.6222112408  | 10.9820011160 | Cu 13.4540482110 | 6.1851397400  | 6.7507590000  |
| Cu 9.7223685336  | 6.9046372449  | 8.8661140602  | Cu -5.1931452207 | 9.7746433232  | 10.9706815160 |

|    |               |               |               |   |               |               |               |
|----|---------------|---------------|---------------|---|---------------|---------------|---------------|
| Cu | -3.9493467024 | 9.0560470933  | 8.8632022187  | C | 3.4371708491  | 7.6504596827  | 13.8966055354 |
| Cu | 12.2109308670 | 8.3386335110  | 6.7507590000  | C | 3.5014436734  | 9.0912196572  | 14.2944471683 |
| Cu | -6.4386541779 | 11.9288262042 | 10.9655031872 | C | 2.2013407773  | 9.8373832522  | 14.1470668579 |
| Cu | -5.1930361812 | 11.2095117491 | 8.8619302635  | C | 2.2027918972  | 11.2627069005 | 14.0932703513 |
| Cu | 10.9678135240 | 10.4921272820 | 6.7507590000  | C | 0.9581122456  | 11.9888327209 | 14.0748647787 |
| Cu | -7.6824431849 | 14.0839122909 | 10.9628292917 | C | 0.9565417075  | 13.4269048106 | 14.0668098775 |
| Cu | -6.4378982596 | 13.3637964689 | 8.8615705616  | C | -0.2870264498 | 14.1457816186 | 14.0674590639 |
| Cu | 9.7246961800  | 12.6456210530 | 6.7507590000  | C | 8.4126840435  | 0.5084999374  | 14.0657742221 |
| Cu | -0.2247245242 | 1.1631991995  | 10.9633925321 | C | 7.1694010314  | 1.2273132688  | 14.0613541666 |
| Cu | 1.0196933823  | 0.4441968616  | 8.8595209835  | C | 9.6515858222  | 2.6664198540  | 14.0677135073 |
| Cu | 8.4815788360  | 14.7991148250 | 6.7507590000  | C | 8.4075339963  | 3.3851041087  | 14.0633167721 |
| C  | 2.1936718874  | 2.6583992289  | 14.0092807693 | C | 8.4046448924  | 4.8232623294  | 14.0738521833 |
| C  | 0.9496141876  | 3.3766585987  | 14.0092711859 | C | 7.1599069447  | 5.5470432774  | 14.0864230460 |
| C  | 0.9463318493  | 4.8100740318  | 13.9812483535 | C | 7.1601383989  | 6.9746362991  | 14.1436460460 |
| C  | -0.2926056948 | 5.5312544330  | 14.0134832537 | C | 5.8709279324  | 7.7231054376  | 14.2545974368 |
| C  | -0.2878454714 | 6.9700271581  | 14.0248565740 | C | 5.9280524428  | 9.1604091669  | 13.8668360315 |
| C  | -1.5339429006 | 7.6871332761  | 14.0520138417 | C | 4.7119620719  | 9.8623673807  | 13.8631212475 |
| C  | -1.5281382750 | 9.1220923413  | 14.0560214367 | C | 4.6886667689  | 11.2897815026 | 13.9154905047 |
| C  | -2.7724290849 | 9.8401622966  | 14.0629546534 | C | 3.4443807539  | 11.9984934117 | 14.0326738909 |
| C  | -2.7727934409 | 11.2759450696 | 14.0661080044 | C | 3.4409746378  | 13.4295106647 | 14.0405746914 |
| C  | -4.0167625017 | 11.9937289320 | 14.0625386889 | C | 2.1968156857  | 14.1497059185 | 14.0648336653 |
| C  | -4.0167263767 | 13.4290677958 | 14.0579152718 | C | 10.8974327670 | 0.5105268972  | 14.0667517860 |
| C  | -5.2602827870 | 14.1472991243 | 14.0502021444 | C | 9.6538204381  | 1.2293180404  | 14.0676690926 |
| C  | 3.4402093071  | 0.5078749202  | 14.0410824252 | C | 12.1385296660 | 2.6655283268  | 14.0657783420 |
| C  | 2.1958808509  | 1.2248738691  | 14.0349593271 | C | 10.8950066598 | 3.3841348591  | 14.0720012485 |
| C  | 4.6807058223  | 2.6597349023  | 14.0152894725 | C | 10.8943097604 | 4.8192609333  | 14.0772838171 |
| C  | 3.4365475258  | 3.3723377327  | 13.9834524487 | C | 9.6487936754  | 5.5381233122  | 14.0857347464 |
| C  | 3.4332413838  | 4.8064967774  | 13.9238820225 | C | 9.6467296896  | 6.9724017498  | 14.0803757602 |
| C  | 2.1897933889  | 5.5242112680  | 13.9214750196 | C | 8.3962648448  | 7.6881959029  | 14.0938811213 |
| C  | 2.1875365935  | 6.9576383025  | 13.9202408085 | C | 8.4123775610  | 9.1298437879  | 14.0278110500 |
| C  | 0.9510536803  | 7.6814115239  | 14.0128012792 | C | 7.1766938683  | 9.8534572087  | 13.9128476953 |
| C  | 0.9680639339  | 9.1235545723  | 14.0800806682 | C | 7.1755858657  | 11.2883083218 | 13.9143203946 |
| C  | -0.2815826516 | 9.8391423306  | 14.0649307142 | C | 5.9316607002  | 12.0067979667 | 13.9149037456 |
| C  | -0.2846859756 | 11.2736520233 | 14.0768645029 | C | 5.9284832395  | 13.4401548080 | 13.9823232883 |
| C  | -1.5300771450 | 11.9931297585 | 14.0710604048 | C | 4.6839384793  | 14.1530151276 | 14.0208636869 |
| C  | -1.5303824958 | 13.4279852227 | 14.0674665799 | C | 13.3832680162 | 0.5130364536  | 14.0439698401 |
| C  | -2.7737929004 | 14.1472042818 | 14.0618715576 | C | 12.1397597886 | 1.2305895357  | 14.0620938155 |
| C  | 5.9270060788  | 0.5074392339  | 14.0558850126 | C | 14.6251798999 | 2.6653867262  | 14.0512939005 |
| C  | 4.6833869637  | 1.2254242967  | 14.0398918994 | C | 13.3815334573 | 3.3833307599  | 14.0609828417 |
| C  | 7.1678878899  | 2.6624727908  | 14.0557227009 | C | 13.3819393542 | 4.8188838625  | 14.0640687300 |
| C  | 5.9240936348  | 3.3827024940  | 14.0291950142 | C | 12.1373643586 | 5.5362329991  | 14.0721352268 |
| C  | 5.9206567281  | 4.8121202770  | 14.0165502378 | C | 12.1374054108 | 6.9719712667  | 14.0698062272 |
| C  | 4.6756206640  | 5.5208200536  | 13.9236239500 | C | 10.8930725237 | 7.6896533704  | 14.0702686815 |
| C  | 4.6503566469  | 6.9498476220  | 13.9002818255 | C | 10.8989351870 | 9.1252806207  | 14.0639231583 |

|              |               |               |               |    |               |               |               |
|--------------|---------------|---------------|---------------|----|---------------|---------------|---------------|
| C            | 9.6538884840  | 9.8428790031  | 14.0388223409 | Cu | -2.7082743599 | 11.2083487937 | 8.8606313683  |
| C            | 9.6584182875  | 11.2806307367 | 14.0186343636 | Cu | -3.9505537859 | 10.4914964410 | 6.7507590000  |
| C            | 8.4185773927  | 12.0023116786 | 13.9815556470 | Cu | -5.1951497766 | 14.0791346462 | 10.9638328615 |
| C            | 8.4154230141  | 13.4358652757 | 14.0085412169 | Cu | -3.9509310092 | 13.3621129974 | 8.8603372100  |
| C            | 7.1715392890  | 14.1542066778 | 14.0092992629 | Cu | -5.1937409821 | 12.6449480770 | 6.7507590000  |
| C            | 15.8710135693 | 0.5135687874  | 14.0349563100 | Cu | 2.2623715141  | 1.1582779760  | 10.9633708813 |
| C            | 14.6264791778 | 1.2304101334  | 14.0433023130 | Cu | 3.5071305533  | 0.4409622314  | 8.8601227415  |
| C            | -0.2929598768 | 2.6618756184  | 14.0344579971 | Cu | -6.4369281790 | 14.7983997130 | 6.7507590000  |
| C            | -1.5359691316 | 3.3811440054  | 14.0419598116 | Cu | 3.5063987036  | 3.3121893801  | 10.9675890873 |
| C            | -1.5361713798 | 4.8165313257  | 14.0390494929 | Cu | 4.7502827145  | 2.5944982135  | 8.8592556978  |
| C            | -2.7796618580 | 5.5346101340  | 14.0569145096 | Cu | 3.5088227159  | 1.8778361710  | 6.7507590000  |
| C            | -2.7772898106 | 6.9707706785  | 14.0596790968 | Cu | 2.2660032336  | 5.4702875972  | 10.9886494816 |
| C            | -4.0214969456 | 7.6881286286  | 14.0658989810 | Cu | 3.5110928262  | 4.7520859438  | 8.8763412900  |
| C            | -4.0178829986 | 9.1234445361  | 14.0650090554 | Cu | 2.2656355189  | 4.0312878069  | 6.7507590000  |
| C            | -5.2619884135 | 9.8412442680  | 14.0654227103 | Cu | 1.0238807833  | 7.6200329441  | 10.9781840426 |
| C            | -5.2598514099 | 11.2770235217 | 14.0588247913 | Cu | 2.2697350554  | 6.9040877268  | 8.8760070659  |
| C            | -6.5029597280 | 11.9953777230 | 14.0425081686 | Cu | 1.0224483220  | 6.1847394429  | 6.7507590000  |
| C            | -6.5034301810 | 13.4308335390 | 14.0414357382 | Cu | -0.2221233336 | 9.7731766913  | 10.9638451843 |
| C            | -7.7464860992 | 14.1503252338 | 14.0349804269 | Cu | 1.0224449299  | 9.0544415234  | 8.8651036528  |
| C            | 0.9530508926  | 0.5096336349  | 14.0404302021 | Cu | -0.2207388750 | 8.3381910781  | 6.7507590000  |
| C            | -0.2909054454 | 1.2279225078  | 14.0410032165 | Cu | -1.4639175199 | 11.9258855084 | 10.9629448245 |
| C            | 5.0878874726  | 6.8787529502  | 16.7564853921 | Cu | -0.2217594696 | 11.2087279688 | 8.8587171880  |
| C            | 5.3535550000  | 8.1489581054  | 16.0362705676 | Cu | -1.4639260720 | 10.4916427141 | 6.7507590000  |
| C            | 4.0493145307  | 8.8856524624  | 15.9927112348 | Cu | -2.7074095601 | 14.0783835109 | 10.9637078240 |
| C            | 3.0791944110  | 8.0008638486  | 16.7197511021 | Cu | -1.4637289961 | 13.3627338120 | 8.8592946258  |
| H            | 6.2465219738  | 8.6762869515  | 16.3764115140 | Cu | -2.7071132690 | 12.6450943501 | 6.7507590000  |
| H            | 4.0425788417  | 9.9135742259  | 16.3663436425 | Cu | 4.7509703609  | 1.1582564711  | 10.9628237964 |
| O            | 5.8493717834  | 6.0022781573  | 17.0843880036 | Cu | 5.9952676965  | 0.4418036824  | 8.8593557703  |
| O            | 1.9318725507  | 8.2175387352  | 17.0194188990 | Cu | -3.9503004659 | 14.7985459861 | 6.7507590000  |
| O            | 3.6980283141  | 6.7747415753  | 17.0086536582 | Cu | 5.9917905124  | 3.3125516007  | 10.9636216356 |
| TS-G/Cu-DMBD |               |               |               | Cu | 7.2367271786  | 2.5979319645  | 8.8601655923  |
| Cu           | 1.0228965499  | 3.3151617782  | 10.9710432218 | Cu | 5.9954504290  | 1.8779824440  | 6.7507590000  |
| Cu           | 2.2647840982  | 2.5956353470  | 8.8605395294  | Cu | 4.7481293888  | 5.4709789611  | 11.0323972881 |
| Cu           | 1.0221950020  | 1.8776898970  | 6.7507590000  | Cu | 5.9870870539  | 4.7538128477  | 8.8732205993  |
| Cu           | -0.2216854992 | 5.4660281156  | 10.9683679340 | Cu | 4.7522632321  | 4.0314340800  | 6.7507590000  |
| Cu           | 1.0266542495  | 4.7519904935  | 8.8674926351  | Cu | 3.5054026459  | 7.6212359030  | 11.0356135194 |
| Cu           | -0.2209921950 | 4.0311415330  | 6.7507590000  | Cu | 4.7501962126  | 6.9027885636  | 8.8981683425  |
| Cu           | -1.4646030931 | 7.6195130150  | 10.9623299226 | Cu | 3.5090760351  | 6.1848857160  | 6.7507590000  |
| Cu           | -0.2181941482 | 6.9031087480  | 8.8639969953  | Cu | 2.2654540637  | 9.7707476130  | 10.9761413794 |
| Cu           | -1.4641793920 | 6.1845931690  | 6.7507590000  | Cu | 3.5091039527  | 9.0493561679  | 8.8752321073  |
| Cu           | -2.7078478955 | 9.7723657860  | 10.9634024686 | Cu | 2.2658888390  | 8.3383373520  | 6.7507590000  |
| Cu           | -1.4655855295 | 9.0548974851  | 8.8590850502  | Cu | 1.0223674603  | 11.9258837652 | 10.9607121671 |
| Cu           | -2.7073665890 | 8.3380448050  | 6.7507590000  | Cu | 2.2662337496  | 11.2049394768 | 8.8630073574  |
| Cu           | -3.9509016937 | 11.9256949474 | 10.9651585315 | Cu | 1.0227016420  | 10.4917889880 | 6.7507590000  |

|                  |               |               |                  |               |               |
|------------------|---------------|---------------|------------------|---------------|---------------|
| Cu -0.2204096970 | 14.0794661209 | 10.9639293281 | Cu 4.7527698721  | 12.6455331710 | 6.7507590000  |
| Cu 1.0234641330  | 13.3621783422 | 8.8593358371  | Cu 12.2109626192 | 1.1591905946  | 10.9651711354 |
| Cu -0.2204855550 | 12.6452406240 | 6.7507590000  | Cu 13.4542691104 | 0.4423791865  | 8.8608178200  |
| Cu 7.2383539800  | 1.1584831831  | 10.9613522961 | Cu 3.5095826760  | 14.7989848070 | 6.7507590000  |
| Cu 8.4825375804  | 0.4427106018  | 8.8590928316  | Cu 13.4541524331 | 3.3128382203  | 10.9654285315 |
| Cu -1.4636727520 | 14.7986922600 | 6.7507590000  | Cu 14.6982146434 | 2.5971026354  | 8.8612722667  |
| Cu 8.4799776775  | 3.3136338302  | 10.9655150188 | Cu 13.4553335709 | 1.8784212641  | 6.7507590000  |
| Cu 9.7235716248  | 2.5979064415  | 8.8602058033  | Cu 12.2107296262 | 5.4658987744  | 10.9634322561 |
| Cu 8.4820781430  | 1.8781287179  | 6.7507590000  | Cu 13.4549709058 | 4.7489229990  | 8.8603572305  |
| Cu 7.2360183010  | 5.4673607890  | 10.9664067768 | Cu 12.2121463739 | 4.0318729001  | 6.7507590000  |
| Cu 8.4770978509  | 4.7522632588  | 8.8609015112  | Cu 10.9683619902 | 7.6201510105  | 10.9609166593 |
| Cu 7.2388909460  | 4.0315803531  | 6.7507590000  | Cu 12.2120675069 | 6.9012362240  | 8.8592792080  |
| Cu 5.9881203668  | 7.6193919205  | 11.0308806030 | Cu 10.9689591770 | 6.1853245360  | 6.7507590000  |
| Cu 7.2309381158  | 6.9070179948  | 8.8729136178  | Cu 9.7248487226  | 9.7739932681  | 10.9622176195 |
| Cu 5.9957037490  | 6.1850319891  | 6.7507590000  | Cu 10.9690817667 | 9.0551791946  | 8.8590503340  |
| Cu 4.7482705428  | 9.7699936479  | 10.9856028919 | Cu 9.7257719800  | 8.3387761720  | 6.7507590000  |
| Cu 5.9941190852  | 9.0508390499  | 8.8763530325  | Cu 8.4802939051  | 11.9282418672 | 10.9631366576 |
| Cu 4.7525165521  | 8.3384836251  | 6.7507590000  | Cu 9.7257681270  | 11.2104026405 | 8.8598968115  |
| Cu 3.5083667771  | 11.9262207544 | 10.9671032406 | Cu 8.4825847830  | 10.4922278080 | 6.7507590000  |
| Cu 4.7520685731  | 11.2029824416 | 8.8665852275  | Cu 7.2366574483  | 14.0795198234 | 10.9653435716 |
| Cu 3.5093293559  | 10.4919352610 | 6.7507590000  | Cu 8.4812875195  | 13.3641216906 | 8.8597568183  |
| Cu 2.2657591445  | 14.0800014690 | 10.9632036971 | Cu 7.2393975860  | 12.6456794440 | 6.7507590000  |
| Cu 3.5090310980  | 13.3603706444 | 8.8600809407  | Cu 14.6968843308 | 1.1593597069  | 10.9667482981 |
| Cu 2.2661421590  | 12.6453868970 | 6.7507590000  | Cu 15.9400083811 | 0.4433294818  | 8.8611358210  |
| Cu 9.7250876323  | 1.1596543788  | 10.9628280225 | Cu 5.9962103891  | 14.7991310800 | 6.7507590000  |
| Cu 10.9687533714 | 0.4430231746  | 8.8597271061  | Cu -1.4654681411 | 3.3120647474  | 10.9646386407 |
| Cu 1.0229549620  | 14.7988385330 | 6.7507590000  | Cu -0.2204235363 | 2.5975179006  | 8.8621101806  |
| Cu 10.9671755392 | 3.3131077100  | 10.9638715441 | Cu 15.9419612840 | 1.8785675380  | 6.7507590000  |
| Cu 12.2109054812 | 2.5968956579  | 8.8599099927  | Cu -2.7087528037 | 5.4653975059  | 10.9644077264 |
| Cu 10.9687058570 | 1.8782749910  | 6.7507590000  | Cu -1.4628083122 | 4.7499833552  | 8.8609884156  |
| Cu 9.7230650422  | 5.4670544161  | 10.9649236047 | Cu 14.6987740871 | 4.0320191740  | 6.7507590000  |
| Cu 10.9664305981 | 4.7499980503  | 8.8602531552  | Cu -3.9515819059 | 7.6188752802  | 10.9645919328 |
| Cu 9.7255186600  | 4.0317266270  | 6.7507590000  | Cu -2.7073002814 | 6.9006946821  | 8.8601521116  |
| Cu 8.4798143320  | 7.6223770774  | 10.9629906641 | Cu 13.4555868909 | 6.1854708100  | 6.7507590000  |
| Cu 9.7229380698  | 6.9029100810  | 8.8598646942  | Cu -5.1941992194 | 9.7727569583  | 10.9639168936 |
| Cu 8.4823314630  | 6.1851782630  | 6.7507590000  | Cu -3.9515074777 | 9.0536616135  | 8.8596808207  |
| Cu 7.2370315185  | 9.7743454433  | 10.9674978170 | Cu 12.2123996940 | 8.3389224460  | 6.7507590000  |
| Cu 8.4825983237  | 9.0573373965  | 8.8590065612  | Cu -6.4385304094 | 11.9262649510 | 10.9639288175 |
| Cu 7.2391442660  | 8.3386298990  | 6.7507590000  | Cu -5.1944991411 | 11.2078093290 | 8.8602803023  |
| Cu 5.9928447408  | 11.9232251684 | 10.9705590324 | Cu 10.9692124970 | 10.4923740819 | 6.7507590000  |
| Cu 7.2387206523  | 11.2087913287 | 8.8603814082  | Cu -7.6823782364 | 14.0792520363 | 10.9665180450 |
| Cu 5.9959570691  | 10.4920815350 | 6.7507590000  | Cu -6.4384638304 | 13.3624313084 | 8.8599840367  |
| Cu 4.7516916806  | 14.0796467064 | 10.9636643708 | Cu 9.7260253000  | 12.6458257179 | 6.7507590000  |
| Cu 5.9945138077  | 13.3605397876 | 8.8617047825  | Cu -0.2231565467 | 1.1593573675  | 10.9654206224 |



|    |               |               |               |   |               |               |               |
|----|---------------|---------------|---------------|---|---------------|---------------|---------------|
| Cu | 1.0199292333  | 0.4419814073  | 8.8599971138  | C | 9.7004561037  | 2.5742432531  | 14.0395287795 |
| Cu | 8.4828381030  | 14.7992773531 | 6.7507590000  | C | 8.4573233376  | 3.2901170989  | 14.0257770634 |
| C  | 2.2429893216  | 2.5718495629  | 14.0387015295 | C | 8.4533632999  | 4.7299789555  | 14.0265120599 |
| C  | 0.9970266856  | 3.2908896497  | 14.0444274343 | C | 7.2165917050  | 5.4439852067  | 14.0447307799 |
| C  | 0.9979765909  | 4.7273099354  | 14.0539488041 | C | 7.2148382024  | 6.8883653469  | 14.0283430912 |
| C  | -0.2469024286 | 5.4420718307  | 14.0354477336 | C | 5.9908935310  | 7.6100418501  | 14.1266179645 |
| C  | -0.2466656561 | 6.8768329360  | 14.0166535168 | C | 5.9772451376  | 9.0244142624  | 14.0887646304 |
| C  | -1.4889564094 | 7.5967730894  | 14.0236319439 | C | 4.7203976299  | 9.7502167917  | 14.0991410555 |
| C  | -1.4877392742 | 9.0318903559  | 14.0270041363 | C | 4.7275258087  | 11.1855059974 | 14.0456350315 |
| C  | -2.7297435444 | 9.7505102580  | 14.0417766506 | C | 3.4871507194  | 11.9068214717 | 14.0273299670 |
| C  | -2.7300921708 | 11.1862948181 | 14.0480041266 | C | 3.4868398157  | 13.3432941813 | 14.0364767084 |
| C  | -3.9725026172 | 11.9036040823 | 14.0535447218 | C | 2.2429925331  | 14.0599564970 | 14.0392542604 |
| C  | -3.9733494218 | 13.3388799278 | 14.0514209219 | C | 10.9446939579 | 0.4211865771  | 14.0476561633 |
| C  | -5.2168943854 | 14.0563293233 | 14.0522602269 | C | 9.7011075584  | 1.1383703690  | 14.0439416455 |
| C  | 3.4857883499  | 0.4173014894  | 14.0451233528 | C | 12.1867500663 | 2.5742997070  | 14.0530279081 |
| C  | 2.2423004923  | 1.1371199610  | 14.0433933926 | C | 10.9446171408 | 3.2915184547  | 14.0470170387 |
| C  | 4.7281126431  | 2.5698638511  | 14.0227139199 | C | 10.9437802179 | 4.7276849426  | 14.0388038305 |
| C  | 3.4868290917  | 3.2890695152  | 14.0395172508 | C | 9.7022886388  | 5.4463218860  | 14.0235310321 |
| C  | 3.4952767133  | 4.7266692964  | 14.1008969380 | C | 9.7039052634  | 6.8814404607  | 14.0120390939 |
| C  | 2.2373372319  | 5.4502026696  | 14.1107158956 | C | 8.4620581322  | 7.6021840669  | 13.9959809582 |
| C  | 2.2315617439  | 6.8729797946  | 14.1290346351 | C | 8.4610113256  | 9.0361637289  | 14.0139635029 |
| C  | 0.9972955580  | 7.5929375414  | 14.0327666415 | C | 7.2171961554  | 9.7506868081  | 14.0303681562 |
| C  | 0.9982155057  | 9.0336367681  | 14.0324026365 | C | 7.2166960037  | 11.1860376467 | 14.0341139274 |
| C  | -0.2411049222 | 9.7493198349  | 14.0246801918 | C | 5.9705315709  | 11.9048355997 | 14.0404148948 |
| C  | -0.2430684352 | 11.1873468923 | 14.0247086134 | C | 5.9715796267  | 13.3391214222 | 14.0457074584 |
| C  | -1.4863468003 | 11.9038901300 | 14.0410062548 | C | 4.7285669930  | 14.0599168902 | 14.0500235086 |
| C  | -1.4865669772 | 13.3393827835 | 14.0436706820 | C | 13.4310474404 | 0.4208369294  | 14.0545896514 |
| C  | -2.7301467377 | 14.0563206159 | 14.0465372020 | C | 12.1879154824 | 1.1387231628  | 14.0533265332 |
| C  | 5.9717566895  | 0.4172341630  | 14.0355595722 | C | 14.6735957800 | 2.5731297651  | 14.0542559662 |
| C  | 4.7278902670  | 1.1329932382  | 14.0323222968 | C | 13.4304736600 | 3.2910726619  | 14.0530986753 |
| C  | 7.2152721133  | 2.5714708372  | 14.0176843252 | C | 13.4303679756 | 4.7265176847  | 14.0473514629 |
| C  | 5.9703575360  | 3.2870038863  | 14.0088609841 | C | 12.1875485079 | 5.4450515050  | 14.0430935601 |
| C  | 5.9657391709  | 4.7234131063  | 14.0391131606 | C | 12.1888680088 | 6.8807526394  | 14.0396691057 |
| C  | 4.7271972234  | 5.4250977587  | 14.1324936162 | C | 10.9468696850 | 7.5995371331  | 14.0298026943 |
| C  | 4.7731846017  | 6.8574063094  | 14.6032399501 | C | 10.9475026326 | 9.0353811275  | 14.0341079568 |
| C  | 3.4407438477  | 7.6230060561  | 14.4874964975 | C | 9.7056458135  | 9.7546533555  | 14.0291196390 |
| C  | 3.4852623615  | 9.0462133987  | 14.1194621483 | C | 9.7042652656  | 11.1877529680 | 14.0442652167 |
| C  | 2.2464812483  | 9.7543748796  | 14.0209544190 | C | 8.4585000889  | 11.9040904278 | 14.0416669473 |
| C  | 2.2442145095  | 11.1900621260 | 14.0043239786 | C | 8.4589445649  | 13.3403452977 | 14.0481713012 |
| C  | 0.9994899924  | 11.9060021603 | 14.0182634688 | C | 7.2152547627  | 14.0579811368 | 14.0494587134 |
| C  | 0.9996957416  | 13.3415846181 | 14.0344556256 | C | 15.9177924778 | 0.4196752521  | 14.0525299005 |
| C  | -0.2436117161 | 14.0580298392 | 14.0417372202 | C | 14.6737498574 | 1.1381825178  | 14.0556198258 |
| C  | 8.4582851728  | 0.4195716130  | 14.0401680059 | C | -0.2448660989 | 2.5731292853  | 14.0471317477 |
| C  | 7.2148385133  | 1.1359561750  | 14.0317874717 | C | -1.4901483139 | 3.2898105565  | 14.0505096494 |

|             |               |               |               |    |               |               |               |
|-------------|---------------|---------------|---------------|----|---------------|---------------|---------------|
| C           | -1.4904052152 | 4.7237852937  | 14.0391814005 | Ni | -3.7806301286 | 10.6572971443 | 11.9762246425 |
| C           | -2.7328221960 | 5.4428677885  | 14.0402578891 | Ni | -5.0164038560 | 9.9452643480  | 10.0000000000 |
| C           | -2.7319863634 | 6.8787212374  | 14.0360905864 | Ni | -5.0188749129 | 11.3673895493 | 13.9653378509 |
| C           | -3.9740187846 | 7.5972949716  | 14.0421795612 | Ni | -5.0156508943 | 12.7966689081 | 11.9749150146 |
| C           | -3.9731481325 | 9.0329391739  | 14.0445709216 | Ni | -6.2521252350 | 12.0854874330 | 10.0000000000 |
| C           | -5.2157389430 | 9.7514607427  | 14.0467886291 | Ni | -6.2520288463 | 13.5096349818 | 13.9619076444 |
| C           | -5.2161103585 | 11.1866585787 | 14.0516356994 | Ni | -6.2518161200 | 14.9379708070 | 11.9738586680 |
| C           | -6.4593696009 | 11.9045622321 | 14.0524504833 | Ni | -7.4878466140 | 14.2257105170 | 10.0000000000 |
| C           | -6.4598112022 | 13.3393277537 | 14.0534182069 | Ni | 3.6340521219  | 0.6680202260  | 13.9617681301 |
| C           | -7.7041256227 | 14.0573534027 | 14.0519781216 | Ni | 3.6341925213  | 2.0968997909  | 11.9719714189 |
| C           | 0.9983849672  | 0.4187660174  | 14.0485001400 | Ni | 2.3977843820  | 1.3842911590  | 10.0000000000 |
| C           | -0.2452589910 | 1.1367583494  | 14.0498113147 | Ni | 2.3960928205  | 2.8047909758  | 13.9575853767 |
| C           | 3.9875967728  | 8.5591958139  | 17.0670799501 | Ni | 2.3961555787  | 4.2368314003  | 11.9670021343 |
| O           | 4.0362118853  | 9.8720544070  | 17.4333537632 | Ni | 1.1620630030  | 3.5245142430  | 10.0000000000 |
| C           | 5.1814517664  | 7.8499476123  | 17.0177355204 | Ni | 1.1619850896  | 4.9533481575  | 13.9559840120 |
| O           | 6.3230253559  | 8.4929968547  | 17.3705272403 | Ni | 1.1631070049  | 6.3812390441  | 11.9722201067 |
| C           | 5.1585750590  | 6.6003424806  | 16.2736942906 | Ni | -0.0736583760 | 5.6647373280  | 10.0000000000 |
| H           | 6.1126242226  | 6.0675726435  | 16.2750104485 | Ni | -0.0768687622 | 7.0943216532  | 13.9621295317 |
| H           | 4.3720389768  | 5.9137941283  | 16.6021105838 | Ni | -0.0713606616 | 8.5197264931  | 11.9772736319 |
| C           | 2.8693058919  | 7.9418855217  | 16.4527961626 | Ni | -1.3093797550 | 7.8049604120  | 10.0000000000 |
| H           | 1.9494097760  | 8.5148058561  | 16.3579244777 | Ni | -1.3088813592 | 9.2312133398  | 13.9645034956 |
| H           | 2.6955261284  | 6.8880499496  | 16.6608140929 | Ni | -1.3084052228 | 10.6587001447 | 11.9770085093 |
| C           | 2.7846578204  | 10.5495896540 | 17.6087946412 | Ni | -2.5451011340 | 9.9451834970  | 10.0000000000 |
| C           | 7.5108666500  | 7.7041713814  | 17.5457170880 | Ni | -2.5463795015 | 11.3692879043 | 13.9655422294 |
| H           | 3.0355569845  | 11.5248506923 | 18.0399481878 | Ni | -2.5445367629 | 12.7974818694 | 11.9758733387 |
| H           | 2.1284441460  | 9.9915273494  | 18.2959029562 | Ni | -3.7808225130 | 12.0854065810 | 10.0000000000 |
| H           | 2.2717231167  | 10.6975101566 | 16.6456273726 | Ni | -3.7809421172 | 13.5097734436 | 13.9632749503 |
| H           | 8.2477136381  | 8.3818580374  | 17.9901744757 | Ni | -3.7795850120 | 14.9377908372 | 11.9747875190 |
| H           | 7.8898542100  | 7.3298664110  | 16.5831339107 | Ni | -5.0165438930 | 14.2256296650 | 10.0000000000 |
| H           | 7.3192662751  | 6.8601906907  | 18.2265788712 | Ni | 6.1062971442  | 0.6701182411  | 13.9634591879 |
| TS-G/Ni-MAH |               |               |               | Ni | 6.1066056827  | 2.0980126675  | 11.9751338292 |
| Ni          | 1.1613214687  | 0.6696420820  | 13.9635385266 | Ni | 4.8690871040  | 1.3842103070  | 10.0000000000 |
| Ni          | 1.1615230470  | 2.0971985715  | 11.9733492966 | Ni | 4.8708235783  | 2.8087555103  | 13.9560587593 |
| Ni          | -0.0735183390 | 1.3843720110  | 10.0000000000 | Ni | 4.8729359508  | 4.2390759547  | 11.9692151715 |
| Ni          | -0.0741989177 | 2.8105160106  | 13.9624607902 | Ni | 3.6333657250  | 3.5244333920  | 10.0000000000 |
| Ni          | -0.0741294851 | 4.2392295945  | 11.9735790043 | Ni | 3.6280200332  | 4.9434735353  | 13.9344955764 |
| Ni          | -1.3092397180 | 3.5245950950  | 10.0000000000 | Ni | 3.6335120679  | 6.3802965943  | 11.9606498484 |
| Ni          | -1.3093760855 | 4.9519107856  | 13.9637629199 | Ni | 2.3976443460  | 5.6646564760  | 10.0000000000 |
| Ni          | -1.3087387117 | 6.3791587417  | 11.9743530551 | Ni | 2.3993197297  | 7.1050005776  | 13.9452468690 |
| Ni          | -2.5449610980 | 5.6648181790  | 10.0000000000 | Ni | 2.3991502411  | 8.5244809481  | 11.9776403679 |
| Ni          | -2.5473599114 | 7.0900477058  | 13.9630179162 | Ni | 1.1619229660  | 7.8048795600  | 10.0000000000 |
| Ni          | -2.5457957923 | 8.5184455754  | 11.9751189847 | Ni | 1.1645607781  | 9.2344163516  | 13.9814898051 |
| Ni          | -3.7806824770 | 7.8050412640  | 10.0000000000 | Ni | 1.1629150017  | 10.6560591702 | 11.9824190159 |
| Ni          | -3.7839480082 | 9.2296146366  | 13.9650768326 | Ni | -0.0737984130 | 9.9451026450  | 10.0000000000 |

|    |               |               |               |    |               |               |               |
|----|---------------|---------------|---------------|----|---------------|---------------|---------------|
| Ni | -0.0737439530 | 11.3698517529 | 13.9721729952 | Ni | 3.6330856510  | 12.0851640260 | 10.0000000000 |
| Ni | -0.0739096031 | 12.7964230650 | 11.9780494325 | Ni | 3.6278901204  | 13.5122929814 | 13.9624639518 |
| Ni | -1.3095197920 | 12.0853257290 | 10.0000000000 | Ni | 3.6320207900  | 14.9381938273 | 11.9737299773 |
| Ni | -1.3085229870 | 13.5105419586 | 13.9664744722 | Ni | 2.3973642720  | 14.2253871100 | 10.0000000000 |
| Ni | -1.3087579855 | 14.9377113415 | 11.9762261382 | Ni | 13.5166407110 | 0.6684504750  | 13.9635262077 |
| Ni | -2.5452411710 | 14.2255488140 | 10.0000000000 | Ni | 13.5180415702 | 2.0973034933  | 11.9741736681 |
| Ni | 8.5756507701  | 0.6704076276  | 13.9652188326 | Ni | 12.2829952680 | 1.3839677520  | 10.0000000000 |
| Ni | 8.5743839219  | 2.0989874529  | 11.9758142797 | Ni | 12.2821473521 | 2.8109113869  | 13.9617965951 |
| Ni | 7.3403898250  | 1.3841294550  | 10.0000000000 | Ni | 12.2821768724 | 4.2377580706  | 11.9733347977 |
| Ni | 7.3369690775  | 2.8175003374  | 13.9678149360 | Ni | 11.0472738890 | 3.5241908360  | 10.0000000000 |
| Ni | 7.3384616026  | 4.2428658320  | 11.9804127343 | Ni | 11.0457498827 | 4.9516923834  | 13.9630534301 |
| Ni | 6.1046684460  | 3.5243525400  | 10.0000000000 | Ni | 11.0453478545 | 6.3784116948  | 11.9749675728 |
| Ni | 6.1008023952  | 4.9667530813  | 13.9774416840 | Ni | 9.8115525100  | 5.6644139210  | 10.0000000000 |
| Ni | 6.1055781540  | 6.3835434637  | 11.9888669073 | Ni | 9.8094622257  | 7.0896481776  | 13.9738088273 |
| Ni | 4.8689470670  | 5.6645756240  | 10.0000000000 | Ni | 9.8054819581  | 8.5165447192  | 11.9831592596 |
| Ni | 4.8728186790  | 7.1039668906  | 13.9620742536 | Ni | 8.5758311310  | 7.8046370050  | 10.0000000000 |
| Ni | 4.8631871956  | 8.5205452200  | 11.9729630662 | Ni | 8.5589578872  | 9.2233378199  | 13.9838097226 |
| Ni | 3.6332256880  | 7.8047987090  | 10.0000000000 | Ni | 8.5761914316  | 10.6525716850 | 11.9720786358 |
| Ni | 3.6358508867  | 9.2349116969  | 13.9929848932 | Ni | 7.3401097520  | 9.9448600900  | 10.0000000000 |
| Ni | 3.6290499655  | 10.6543112064 | 11.9758502907 | Ni | 7.3442570044  | 11.3764269811 | 13.9386741977 |
| Ni | 2.3975043090  | 9.9450217930  | 10.0000000000 | Ni | 7.3396842165  | 12.7991896720 | 11.9679062573 |
| Ni | 2.3959317756  | 11.3669379964 | 13.9761634285 | Ni | 6.1043883730  | 12.0850831740 | 10.0000000000 |
| Ni | 2.3964558049  | 12.7957032664 | 11.9784883762 | Ni | 6.1007376359  | 13.5079322580 | 13.9582023452 |
| Ni | 1.1617829300  | 12.0852448780 | 10.0000000000 | Ni | 6.1027457886  | 14.9378267747 | 11.9737402413 |
| Ni | 1.1628978640  | 13.5079551661 | 13.9681369224 | Ni | 4.8686669930  | 14.2253062580 | 10.0000000000 |
| Ni | 1.1607600908  | 14.9383317306 | 11.9761188163 | Ni | 15.9888238527 | 0.6692971484  | 13.9623391180 |
| Ni | -0.0739384500 | 14.2254679620 | 10.0000000000 | Ni | 15.9896265649 | 2.0972163539  | 11.9741238702 |
| Ni | 11.0466306694 | 0.6712197139  | 13.9635872294 | Ni | 14.7542979900 | 1.3838869000  | 10.0000000000 |
| Ni | 11.0461099201 | 2.0980182308  | 11.9735015788 | Ni | 14.7545477103 | 2.8093811401  | 13.9627162583 |
| Ni | 9.8116925470  | 1.3840486040  | 10.0000000000 | Ni | 14.7540723162 | 4.2378314009  | 11.9742380147 |
| Ni | 9.8102794233  | 2.8109444944  | 13.9634677233 | Ni | 13.5185766110 | 3.5241099850  | 10.0000000000 |
| Ni | 9.8095993904  | 4.2387508137  | 11.9753332357 | Ni | 13.5176173013 | 4.9499316869  | 13.9619441754 |
| Ni | 8.5759711680  | 3.5242716880  | 10.0000000000 | Ni | 13.5175022736 | 6.3779021338  | 11.9733447078 |
| Ni | 8.5762940517  | 4.9539250731  | 13.9723762970 | Ni | 12.2828552320 | 5.6643330690  | 10.0000000000 |
| Ni | 8.5720974352  | 6.3797763092  | 11.9880499859 | Ni | 12.2810046423 | 7.0903200470  | 13.9642061719 |
| Ni | 7.3402497890  | 5.6644947720  | 10.0000000000 | Ni | 12.2797932162 | 8.5177543529  | 11.9763128200 |
| Ni | 7.3375437646  | 7.0901944192  | 14.0235376403 | Ni | 11.0471338520 | 7.8045561530  | 10.0000000000 |
| Ni | 7.3356040764  | 8.5123879797  | 11.9916370701 | Ni | 11.0365362930 | 9.2279116522  | 13.9721543748 |
| Ni | 6.1045284090  | 7.8047178570  | 10.0000000000 | Ni | 11.0465735589 | 10.6550030244 | 11.9771260349 |
| Ni | 6.0976660355  | 9.2184329200  | 13.9643866829 | Ni | 9.8114124730  | 9.9447792380  | 10.0000000000 |
| Ni | 6.1032309138  | 10.6551215144 | 11.9618800008 | Ni | 9.8108964727  | 11.3669088152 | 13.9604364208 |
| Ni | 4.8688070300  | 9.9449409410  | 10.0000000000 | Ni | 9.8118247367  | 12.7964058899 | 11.9723702469 |
| Ni | 4.8595092949  | 11.3628510170 | 13.9475772678 | Ni | 8.5756910940  | 12.0850023220 | 10.0000000000 |
| Ni | 4.8667660024  | 12.7953599255 | 11.9739549521 | Ni | 8.5783220474  | 13.5134427724 | 13.9577972382 |

|    |               |               |               |   |               |               |               |
|----|---------------|---------------|---------------|---|---------------|---------------|---------------|
| Ni | 8.5753599328  | 14.9384829790 | 11.9732299308 | C | 8.5725328230  | 0.6659470024  | 16.1023521320 |
| Ni | 7.3399697150  | 14.2252254070 | 10.0000000000 | C | 7.3365532444  | 1.3811349150  | 16.1078809807 |
| C  | 1.1578007180  | 0.6678932005  | 16.1096985299 | C | 7.3342682977  | 2.8083048311  | 16.1084738486 |
| C  | -0.0779843125 | 1.3811518743  | 16.1135491130 | C | 6.0993156470  | 3.5237950158  | 16.1032004679 |
| C  | -0.0793306718 | 2.8076026228  | 16.1083885826 | C | 6.0982779872  | 4.9471448517  | 16.0917141298 |
| C  | -1.3152324361 | 3.5214319855  | 16.1051351482 | C | 4.8643537443  | 5.6586781315  | 16.0037299671 |
| C  | -1.3157150834 | 4.9481666247  | 16.1006590983 | C | 4.8710763750  | 7.0878797774  | 15.9668358971 |
| C  | -2.5520254948 | 5.6618363613  | 16.1000575577 | C | 3.6320293005  | 7.7902804517  | 15.9162592826 |
| C  | -2.5508183238 | 7.0890170285  | 16.1019933801 | C | 3.6787384885  | 9.1987144900  | 16.3243100026 |
| C  | -3.7884121693 | 7.8020269596  | 16.0991375669 | C | 2.4158393513  | 9.9268799579  | 16.1907488598 |
| C  | -3.7837806334 | 9.2284157525  | 16.1016226485 | C | 2.4047051383  | 11.3538322252 | 16.1566718065 |
| C  | -5.0212028378 | 9.9412120600  | 16.1114838502 | C | 1.1679463163  | 12.0726987864 | 16.1275938429 |
| C  | -5.0188734529 | 11.3683579843 | 16.1062670423 | C | 1.1628261544  | 13.5028218804 | 16.1131731008 |
| C  | -6.2549560766 | 12.0816691195 | 16.1033162806 | C | -0.0740990127 | 14.2183612135 | 16.1041051123 |
| C  | -6.2551823698 | 13.5087144042 | 16.1016325666 | C | 11.0417760092 | 0.6674442882  | 16.1036669309 |
| C  | -7.4908373038 | 14.2228742443 | 16.1063634778 | C | 9.8053922687  | 1.3830031365  | 16.0987201039 |
| C  | 3.6300619214  | 0.6668233791  | 16.1025266602 | C | 9.8022809433  | 2.8121295729  | 16.0927778722 |
| C  | 2.3939139927  | 1.3799492031  | 16.1075585150 | C | 8.5647138143  | 3.5285081334  | 16.0954835798 |
| C  | 2.3923381271  | 2.8062606400  | 16.0970968483 | C | 8.5600483684  | 4.9592944023  | 16.1097986171 |
| C  | 1.1563474214  | 3.5192205509  | 16.1010568331 | C | 7.3231278694  | 5.6829241030  | 16.1589848239 |
| C  | 1.1551291438  | 4.9451169160  | 16.0852669028 | C | 7.3097358178  | 7.1017870416  | 16.2531978474 |
| C  | -0.0790767246 | 5.6601822291  | 16.0946807032 | C | 6.0289603779  | 7.8419062290  | 16.5473121626 |
| C  | -0.0773420994 | 7.0874736957  | 16.1024357048 | C | 6.1064083184  | 9.2219545644  | 15.9671503657 |
| C  | -1.3136265730 | 7.8002658985  | 16.1114475225 | C | 4.8734316900  | 9.9420518563  | 15.9023629116 |
| C  | -1.3067830950 | 9.2261095703  | 16.1025241126 | C | 4.8664783762  | 11.3735651494 | 16.0240279995 |
| C  | -2.5446127161 | 9.9399449377  | 16.0996190248 | C | 3.6318164850  | 12.0806546938 | 16.1299902779 |
| C  | -2.5449522820 | 11.3670245712 | 16.1029817501 | C | 3.6295220409  | 13.5065396941 | 16.1215927787 |
| C  | -3.7817812156 | 12.0803970642 | 16.1045957226 | C | 2.3945089096  | 14.2214102874 | 16.1224317460 |
| C  | -3.7824570846 | 13.5074621240 | 16.1046963504 | C | 13.5129819371 | 0.6686507905  | 16.0992271735 |
| C  | -5.0185209001 | 14.2211045206 | 16.1035875181 | C | 12.2767449685 | 1.3824314333  | 16.0995186324 |
| C  | 6.1016850611  | 0.6661572970  | 16.1052633817 | C | 12.2749305365 | 2.8100236518  | 16.0972194319 |
| C  | 4.8658847387  | 1.3798667118  | 16.1017212748 | C | 11.0382435621 | 3.5247115761  | 16.0961954316 |
| C  | 4.8640784165  | 2.8072312461  | 16.0916406998 | C | 11.0358346369 | 4.9517332685  | 16.1009168695 |
| C  | 3.6283352163  | 3.5178694605  | 16.0774764378 | C | 9.7974399636  | 5.6667765175  | 16.1182929009 |
| C  | 3.6270133496  | 4.9443701655  | 16.0302470983 | C | 9.7911362459  | 7.0921184154  | 16.1266326789 |
| C  | 2.3907852607  | 5.6565104627  | 16.0382462149 | C | 8.5465790659  | 7.8006732522  | 16.1971770321 |
| C  | 2.3889117189  | 7.0813471050  | 16.0108163825 | C | 8.5697442985  | 9.2299565135  | 16.1468836030 |
| C  | 1.1572241772  | 7.7982283530  | 16.0875337055 | C | 7.3371999459  | 9.9418631196  | 16.0429490016 |
| C  | 1.1746118721  | 9.2245012739  | 16.1326914803 | C | 7.3380121805  | 11.3708481287 | 16.0447079670 |
| C  | -0.0654065176 | 9.9365518825  | 16.1132206692 | C | 6.1020846885  | 12.0852246557 | 16.0452084348 |
| C  | -0.0701883744 | 11.3638166163 | 16.1175908876 | C | 6.1010192758  | 13.5117891545 | 16.0874644084 |
| C  | -1.3072587440 | 12.0781246476 | 16.1096296195 | C | 4.8639606187  | 14.2226335354 | 16.0987599138 |
| C  | -1.3102266420 | 13.5056035375 | 16.1055974221 | C | 15.9852348707 | 0.6686247593  | 16.1071025076 |
| C  | -2.5463779054 | 14.2202369421 | 16.1057449744 | C | 14.7487712407 | 1.3817087827  | 16.1030907054 |

|              |               |               |               |    |               |               |               |
|--------------|---------------|---------------|---------------|----|---------------|---------------|---------------|
| C            | 14.7474157798 | 2.8087623941  | 16.1023987481 | Ni | 3.6320619520  | 2.0999772437  | 11.9732335254 |
| C            | 13.5110064811 | 3.5224920313  | 16.1009538174 | Ni | 2.3978687480  | 1.3845028500  | 10.0000000000 |
| C            | 13.5100519739 | 4.9494584805  | 16.0984363735 | Ni | 2.3970374596  | 2.8159521079  | 13.9609841719 |
| C            | 12.2727002038 | 5.6628907999  | 16.0985461905 | Ni | 2.4025795184  | 4.2443225904  | 11.9798096258 |
| C            | 12.2715746689 | 7.0897984416  | 16.0961570468 | Ni | 1.1622567960  | 3.5247880950  | 10.0000000000 |
| C            | 11.0324423294 | 7.8032332189  | 16.1084754155 | Ni | 1.1580084388  | 4.9495768781  | 13.9542941430 |
| C            | 11.0408685753 | 9.2291917385  | 16.1240346435 | Ni | 1.1683010380  | 6.3821619999  | 11.9777799616 |
| C            | 9.8036793208  | 9.9405955717  | 16.1362052520 | Ni | -0.0733551550 | 5.6650733410  | 10.0000000000 |
| C            | 9.8073480341  | 11.3684602984 | 16.1031461933 | Ni | -0.0762884678 | 7.0896776833  | 13.9497619501 |
| C            | 8.5739473418  | 12.0838466687 | 16.0842423552 | Ni | -0.0703359083 | 8.5192142018  | 11.9706380270 |
| C            | 8.5723354204  | 13.5104425497 | 16.0966762627 | Ni | -1.3089671070 | 7.8053585870  | 10.0000000000 |
| C            | 7.3365295831  | 14.2239799165 | 16.1004443506 | Ni | -1.3112339694 | 9.2331755715  | 13.9560806452 |
| C            | 5.2739305798  | 6.8121414715  | 18.7861151077 | Ni | -1.3107153426 | 10.6585557634 | 11.9720622537 |
| C            | 5.6161274374  | 8.1235753735  | 18.0995381325 | Ni | -2.5445790590 | 9.9456438330  | 10.0000000000 |
| C            | 4.3302869764  | 8.9209315526  | 18.1914560716 | Ni | -2.5497304656 | 11.3720435781 | 13.9620880624 |
| C            | 3.3456380284  | 8.0856059445  | 18.8621915068 | Ni | -2.5469393460 | 12.7992225408 | 11.9743014142 |
| H            | 6.4848022645  | 8.5966656272  | 18.5777049831 | Ni | -3.7801910100 | 12.0859290780 | 10.0000000000 |
| H            | 4.3573502466  | 9.9659375462  | 18.5012612904 | Ni | -3.7857817054 | 13.5122558981 | 13.9641034298 |
| O            | 6.0097248934  | 5.8818445182  | 19.0195508698 | Ni | -3.7826210483 | 14.9394554228 | 11.9735164086 |
| O            | 2.1950410162  | 8.2935247563  | 19.1735961086 | Ni | -5.0158029620 | 14.2262143240 | 10.0000000000 |
| O            | 3.9240635652  | 6.7804345435  | 19.0871335627 | Ni | 6.0988271173  | 0.6699677186  | 13.9593229309 |
| TS-G/Ni-DMBD |               |               |               | Ni | 6.1017502868  | 2.0993145119  | 11.9705749880 |
| Ni           | 1.1584913083  | 0.6708080784  | 13.9611325519 | Ni | 4.8691819690  | 1.3845545500  | 10.0000000000 |
| Ni           | 1.1618326496  | 2.0989673131  | 11.9722637803 | Ni | 4.8640599309  | 2.8151526626  | 13.9580871186 |
| Ni           | -0.0734444730 | 1.3844511490  | 10.0000000000 | Ni | 4.8631452217  | 4.2442071173  | 11.9752252177 |
| Ni           | -0.0777509440 | 2.8088062295  | 13.9581448394 | Ni | 3.6335700170  | 3.5248397960  | 10.0000000000 |
| Ni           | -0.0736163118 | 4.2389586546  | 11.9701073539 | Ni | 3.6360684791  | 4.9727627245  | 13.9945467374 |
| Ni           | -1.3090564250 | 3.5247363950  | 10.0000000000 | Ni | 3.6318469870  | 6.3843879112  | 11.9991272670 |
| Ni           | -1.3127446175 | 4.9502776696  | 13.9570342194 | Ni | 2.3979580650  | 5.6651250420  | 10.0000000000 |
| Ni           | -1.3092209036 | 6.3787300159  | 11.9703424974 | Ni | 2.4141133200  | 7.0941103233  | 14.0212118823 |
| Ni           | -2.5446683760 | 5.6650216410  | 10.0000000000 | Ni | 2.4049565490  | 8.5141408143  | 11.9897761437 |
| Ni           | -2.5507105750 | 7.0932348544  | 13.9589788319 | Ni | 1.1623461140  | 7.8054102870  | 10.0000000000 |
| Ni           | -2.5458278667 | 8.5187436959  | 11.9724013027 | Ni | 1.1740742520  | 9.2225785391  | 13.9639817681 |
| Ni           | -3.7802803280 | 7.8053068860  | 10.0000000000 | Ni | 1.1626480191  | 10.6544422796 | 11.9687715521 |
| Ni           | -3.7853834779 | 9.2328182334  | 13.9625787028 | Ni | -0.0732658380 | 9.9456955330  | 10.0000000000 |
| Ni           | -3.7828214639 | 10.6590939645 | 11.9746121399 | Ni | -0.0780371752 | 11.3694886929 | 13.9541966300 |
| Ni           | -5.0158922800 | 9.9455921320  | 10.0000000000 | Ni | -0.0745895108 | 12.7984870532 | 11.9716283020 |
| Ni           | -5.0213150688 | 11.3723769603 | 13.9647362682 | Ni | -1.3088777900 | 12.0859807790 | 10.0000000000 |
| Ni           | -5.0183439130 | 12.7991385793 | 11.9749736498 | Ni | -1.3143819199 | 13.5118417399 | 13.9617260135 |
| Ni           | -6.2515042310 | 12.0858773780 | 10.0000000000 | Ni | -1.3107835160 | 14.9398689702 | 11.9730752589 |
| Ni           | -6.2568912940 | 13.5123754198 | 13.9639223860 | Ni | -2.5444897410 | 14.2262660250 | 10.0000000000 |
| Ni           | -6.2532367651 | 14.9396163882 | 11.9738287150 | Ni | 8.5714325342  | 0.6708450656  | 13.9616703571 |
| Ni           | -7.4871161830 | 14.2261626240 | 10.0000000000 | Ni | 8.5744624954  | 2.0981127301  | 11.9721016123 |
| Ni           | 3.6281191390  | 0.6713999506  | 13.9611613796 | Ni | 7.3404951890  | 1.3846062500  | 10.0000000000 |

|    |               |               |               |    |               |               |               |
|----|---------------|---------------|---------------|----|---------------|---------------|---------------|
| Ni | 7.3350666001  | 2.8106126701  | 13.9552905337 | Ni | 11.0475096790 | 3.5249948970  | 10.0000000000 |
| Ni | 7.3361847688  | 4.2394904329  | 11.9710719828 | Ni | 11.0435169736 | 4.9519238850  | 13.9611127621 |
| Ni | 6.1048832380  | 3.5248914960  | 10.0000000000 | Ni | 11.0455846495 | 6.3790201379  | 11.9721162202 |
| Ni | 6.0995577451  | 4.9589968923  | 13.9584494232 | Ni | 9.8118977280  | 5.6652801430  | 10.0000000000 |
| Ni | 6.1000199750  | 6.3807956751  | 11.9714100004 | Ni | 9.8072771340  | 7.0936062858  | 13.9544889724 |
| Ni | 4.8692712860  | 5.6651767420  | 10.0000000000 | Ni | 9.8080592821  | 8.5198547748  | 11.9705564430 |
| Ni | 4.8699243368  | 7.0930826242  | 13.9971281684 | Ni | 8.5762857760  | 7.8055653890  | 10.0000000000 |
| Ni | 4.8636608045  | 8.5180644355  | 11.9975566024 | Ni | 8.5690332180  | 9.2309818899  | 13.9588350853 |
| Ni | 3.6336593340  | 7.8054619880  | 10.0000000000 | Ni | 8.5726367066  | 10.6578909712 | 11.9740814788 |
| Ni | 3.6370531833  | 9.2109625272  | 14.0224582189 | Ni | 7.3406738240  | 9.9458506350  | 10.0000000000 |
| Ni | 3.6341720855  | 10.6499214158 | 11.9768999825 | Ni | 7.3341320387  | 11.3663344803 | 13.9633512727 |
| Ni | 2.3980473830  | 9.9457472340  | 10.0000000000 | Ni | 7.3383432468  | 12.7968498130 | 11.9733266144 |
| Ni | 2.3959322200  | 11.3724375323 | 13.9436772541 | Ni | 6.1050618730  | 12.0861358800 | 10.0000000000 |
| Ni | 2.3976737903  | 12.7980486636 | 11.9691012836 | Ni | 6.1028966964  | 13.5130210019 | 13.9599083103 |
| Ni | 1.1624354310  | 12.0860324790 | 10.0000000000 | Ni | 6.1030684914  | 14.9387268998 | 11.9730170485 |
| Ni | 1.1559549274  | 13.5133180611 | 13.9578409820 | Ni | 4.8694499210  | 14.2264211260 | 10.0000000000 |
| Ni | 1.1612551620  | 14.9392998765 | 11.9729550968 | Ni | 15.9853856600 | 0.6706385769  | 13.9615008640 |
| Ni | -0.0731765210 | 14.2263177250 | 10.0000000000 | Ni | 15.9881885966 | 2.0980506843  | 11.9724424097 |
| Ni | 11.0434124332 | 0.6706459861  | 13.9622713157 | Ni | 14.7544348520 | 1.3847613520  | 10.0000000000 |
| Ni | 11.0457217840 | 2.0980723014  | 11.9736798618 | Ni | 14.7496700124 | 2.8110670560  | 13.9619795291 |
| Ni | 9.8118084100  | 1.3846579510  | 10.0000000000 | Ni | 14.7525907182 | 4.2382791513  | 11.9727237581 |
| Ni | 9.8077857114  | 2.8109496379  | 13.9612408049 | Ni | 13.5188229000 | 3.5250465980  | 10.0000000000 |
| Ni | 9.8103723041  | 4.2384726283  | 11.9715666191 | Ni | 13.5143748173 | 4.9517098803  | 13.9618390147 |
| Ni | 8.5761964590  | 3.5249431970  | 10.0000000000 | Ni | 13.5173493099 | 6.3789237075  | 11.9729943432 |
| Ni | 8.5746919717  | 4.9499560160  | 13.9526365503 | Ni | 12.2832109480 | 5.6653318430  | 10.0000000000 |
| Ni | 8.5722265574  | 6.3803019003  | 11.9703038797 | Ni | 12.2781854890 | 7.0924482273  | 13.9620527860 |
| Ni | 7.3405845070  | 5.6652284430  | 10.0000000000 | Ni | 12.2807593320 | 8.5192433110  | 11.9733327052 |
| Ni | 7.3297481758  | 7.0882589179  | 13.9563859164 | Ni | 11.0475989970 | 7.8056170890  | 10.0000000000 |
| Ni | 7.3315657362  | 8.5205035522  | 11.9755746321 | Ni | 11.0427299092 | 9.2340569366  | 13.9597145864 |
| Ni | 6.1049725550  | 7.8055136880  | 10.0000000000 | Ni | 11.0450666042 | 10.6598304548 | 11.9739670744 |
| Ni | 6.0873628130  | 9.2173763516  | 13.9979788943 | Ni | 9.8119870450  | 9.9459023350  | 10.0000000000 |
| Ni | 6.1015078847  | 10.6505977368 | 11.9803519590 | Ni | 9.8065288375  | 11.3727067757 | 13.9623727709 |
| Ni | 4.8693606040  | 9.9457989340  | 10.0000000000 | Ni | 9.8096012506  | 12.7986369636 | 11.9740996273 |
| Ni | 4.8669146666  | 11.3728564568 | 13.9553668468 | Ni | 8.5763750930  | 12.0861875810 | 10.0000000000 |
| Ni | 4.8683134694  | 12.7969383397 | 11.9709969909 | Ni | 8.5717142177  | 13.5106589015 | 13.9620989199 |
| Ni | 3.6337486520  | 12.0860841800 | 10.0000000000 | Ni | 8.5744785097  | 14.9391617742 | 11.9733926336 |
| Ni | 3.6309411891  | 13.5122616516 | 13.9577339656 | Ni | 7.3407631420  | 14.2264728270 | 10.0000000000 |
| Ni | 3.6324918306  | 14.9393411386 | 11.9732087827 | C  | 1.1453613905  | 0.6684474465  | 16.0986760194 |
| Ni | 2.3981367000  | 14.2263694260 | 10.0000000000 | C  | -0.0903751847 | 1.3821245241  | 16.0995304670 |
| Ni | 13.5145025907 | 0.6706024408  | 13.9628382504 | C  | -0.0900130223 | 2.8096496543  | 16.0939274361 |
| Ni | 13.5169128554 | 2.0977637510  | 11.9737314123 | C  | -1.3268409389 | 3.5227496775  | 16.0981944391 |
| Ni | 12.2831216310 | 1.3847096510  | 10.0000000000 | C  | -1.3266711062 | 4.9492055387  | 16.0922505855 |
| Ni | 12.2788418362 | 2.8109515135  | 13.9629673689 | C  | -2.5624697874 | 5.6631024243  | 16.0962459020 |
| Ni | 12.2812742039 | 4.2384037635  | 11.9735299150 | C  | -2.5611028097 | 7.0899138978  | 16.0934178200 |

|   |               |               |               |   |               |               |               |
|---|---------------|---------------|---------------|---|---------------|---------------|---------------|
| C | -3.7972825022 | 7.8037042219  | 16.1028516073 | C | 2.3922813830  | 9.9369711101  | 16.0177518430 |
| C | -3.7962267836 | 9.2304189460  | 16.1059143829 | C | 2.3846617446  | 11.3702435662 | 16.0387386584 |
| C | -5.0329069690 | 9.9436522162  | 16.1090568715 | C | 1.1461328836  | 12.0827888975 | 16.0734122065 |
| C | -5.0321400680 | 11.3703290292 | 16.1118641064 | C | 1.1464781644  | 13.5109926979 | 16.0939597525 |
| C | -6.2683083461 | 12.0830638506 | 16.1121985339 | C | -0.0898834743 | 14.2241771202 | 16.1032214219 |
| C | -6.2678178788 | 13.5098179193 | 16.1070819225 | C | 11.0303359944 | 0.6700969857  | 16.1043288085 |
| C | -7.5039238086 | 14.2230984009 | 16.1020637477 | C | 9.7939221706  | 1.3839105909  | 16.1039496811 |
| C | 3.6170199016  | 0.6680388446  | 16.1046466039 | C | 9.7935611994  | 2.8109949254  | 16.1026660306 |
| C | 2.3812623530  | 1.3823799269  | 16.0994796458 | C | 8.5571180592  | 3.5247590318  | 16.0928159694 |
| C | 2.3811929789  | 2.8091555867  | 16.0968896253 | C | 8.5554009908  | 4.9521200248  | 16.0884132829 |
| C | 1.1455625042  | 3.5231316833  | 16.0881956185 | C | 7.3183105503  | 5.6657172052  | 16.0712270061 |
| C | 1.1466789714  | 4.9516061343  | 16.0759932465 | C | 7.3129745152  | 7.0936372591  | 16.0468357703 |
| C | -0.0907869052 | 5.6622377479  | 16.0753194408 | C | 6.0664869898  | 7.8018801646  | 16.1097867273 |
| C | -0.0875907872 | 7.0880945099  | 16.0524638862 | C | 6.0855424201  | 9.2261425139  | 16.1235702908 |
| C | -1.3243635597 | 7.8038357865  | 16.0768292168 | C | 4.8451252281  | 9.9387195806  | 16.0945527493 |
| C | -1.3241534864 | 9.2298857383  | 16.0968674564 | C | 4.8518065811  | 11.3682495231 | 16.0726997020 |
| C | -2.5602894265 | 9.9435658309  | 16.1102959115 | C | 3.6182693119  | 12.0847361899 | 16.0703046603 |
| C | -2.5602461498 | 11.3700283684 | 16.1144317669 | C | 3.6174686577  | 13.5119775807 | 16.0944583328 |
| C | -3.7962484854 | 12.0832291485 | 16.1158030459 | C | 2.3814112532  | 14.2251349378 | 16.0983447812 |
| C | -3.7964274685 | 13.5099524339 | 16.1105112477 | C | 13.5015946346 | 0.6697183584  | 16.1056357725 |
| C | -5.0322540389 | 14.2233567064 | 16.1099335296 | C | 12.2656654024 | 1.3835891309  | 16.1085739573 |
| C | 6.0878626355  | 0.6687875410  | 16.0989687219 | C | 12.2653891746 | 2.8104432589  | 16.1077283556 |
| C | 4.8516585515  | 1.3818273172  | 16.1004157075 | C | 11.0290507270 | 3.5240954039  | 16.1083044461 |
| C | 4.8506779690  | 2.8087914310  | 16.0898417224 | C | 11.0286510224 | 4.9509431516  | 16.1028102279 |
| C | 3.6159069796  | 3.5246359161  | 16.1019341481 | C | 9.7919321696  | 5.6643504187  | 16.0941205874 |
| C | 3.6174303855  | 4.9502269360  | 16.1302520405 | C | 9.7917315337  | 7.0908162120  | 16.0806790324 |
| C | 2.3815920724  | 5.6715353181  | 16.1075980353 | C | 8.5535235670  | 7.8059566309  | 16.0543414291 |
| C | 2.4023071255  | 7.0939886805  | 16.0986410946 | C | 8.5572325140  | 9.2319257439  | 16.0904340849 |
| C | 1.1561477165  | 7.7972977873  | 16.0343354491 | C | 7.3190939257  | 9.9412408224  | 16.1019953912 |
| C | 1.1471120762  | 9.2294089070  | 16.0626992826 | C | 7.3226232544  | 11.3690074736 | 16.1011379118 |
| C | -0.0869824358 | 9.9420247454  | 16.0946837065 | C | 6.0877743531  | 12.0829481411 | 16.0926936894 |
| C | -0.0885329593 | 11.3697494929 | 16.0956778745 | C | 6.0879677160  | 13.5098380184 | 16.0986560574 |
| C | -1.3248533074 | 12.0830103413 | 16.1099980299 | C | 4.8524265402  | 14.2248557962 | 16.1025320436 |
| C | -1.3247791728 | 13.5099840863 | 16.1049370967 | C | 15.9732065772 | 0.6689380442  | 16.1014701101 |
| C | -2.5612238465 | 14.2237024799 | 16.1065245516 | C | 14.7371151865 | 1.3829167601  | 16.1043076456 |
| C | 8.5588885139  | 0.6699701997  | 16.1014601343 | C | 14.7370182606 | 2.8098669260  | 16.1032375635 |
| C | 7.3224822983  | 1.3835300593  | 16.0963863474 | C | 13.5008407951 | 3.5234841336  | 16.1067512603 |
| C | 7.3219533896  | 2.8115523499  | 16.0796909057 | C | 13.5010908749 | 4.9504551755  | 16.1021089131 |
| C | 6.0833361841  | 3.5252429179  | 16.0589984909 | C | 12.2644506951 | 5.6640391604  | 16.1027441817 |
| C | 6.0797702647  | 4.9553225029  | 16.0518550112 | C | 12.2650818528 | 7.0909746334  | 16.1018248252 |
| C | 4.8412958036  | 5.6772768908  | 16.1173389765 | C | 11.0285828058 | 7.8043054492  | 16.0995852320 |
| C | 4.8743040488  | 7.0726288292  | 16.4926546898 | C | 11.0299837292 | 9.2309984450  | 16.1027441646 |
| C | 3.5751475910  | 7.8297050551  | 16.6909034761 | C | 9.7938448063  | 9.9440226947  | 16.1056483041 |
| C | 3.6241551253  | 9.2102711144  | 16.0891062791 | C | 9.7950719273  | 11.3702041199 | 16.1087539034 |

|          |              |               |               |   |              |              |              |
|----------|--------------|---------------|---------------|---|--------------|--------------|--------------|
| C        | 8.5582033124 | 12.0822605682 | 16.1045536014 | C | -0.320835710 | 11.132233798 | 14.136842754 |
| C        | 8.5590982006 | 13.5099123609 | 16.1014742279 | C | -1.556887016 | 11.846690140 | 14.126932830 |
| C        | 7.3237239552 | 14.2237419752 | 16.1027745884 | C | -1.556927455 | 13.267593336 | 14.110182857 |
| C        | 4.2677080000 | 8.6951329955  | 19.0242639229 | C | -2.788423393 | 13.980976701 | 14.060880277 |
| O        | 4.2557599661 | 10.0098867025 | 19.3764719515 | C | 5.830084988  | 0.472518476  | 14.029112097 |
| C        | 5.4674723316 | 8.0001200786  | 19.1062980311 | C | 4.600609272  | 1.182667402  | 13.943044647 |
| O        | 6.5863089763 | 8.6968638936  | 19.4778290086 | C | 7.061146785  | 2.605786879  | 14.060959212 |
| C        | 5.4921489237 | 6.6959179709  | 18.5676068203 | C | 5.829755097  | 3.320706365  | 13.977952223 |
| H        | 6.4401929910 | 6.1746038503  | 18.4644717147 | C | 5.824718938  | 4.736398886  | 13.980707587 |
| H        | 4.6383384560 | 6.0420436471  | 18.7283349382 | C | 4.597841642  | 5.436901137  | 13.830973232 |
| C        | 3.1850713826 | 8.0450541785  | 18.2695554677 | C | 4.565837138  | 6.853034709  | 13.859997019 |
| H        | 2.2560241778 | 8.6238438327  | 18.2816084426 | C | 3.371517000  | 7.542555974  | 13.855759289 |
| H        | 2.9493339683 | 7.0436918763  | 18.6546244932 | C | 3.436821848  | 8.964801467  | 14.304596351 |
| C        | 2.9854942091 | 10.6623298620 | 19.5063426999 | C | 2.142117344  | 9.708224225  | 14.183583235 |
| C        | 7.7947448707 | 7.9437339066  | 19.6238198660 | C | 2.145140990  | 11.117109966 | 14.114644964 |
| H        | 3.2071553810 | 11.6589338706 | 19.9032440514 | C | 0.911150707  | 11.838789161 | 14.119794425 |
| H        | 2.3348138645 | 10.1167169350 | 20.2083396190 | C | 0.909046712  | 13.262837659 | 14.102829800 |
| H        | 2.4796950650 | 10.7627232909 | 18.5335867174 | C | -0.322966849 | 13.976923709 | 14.112426377 |
| H        | 8.5320017664 | 8.6413406268  | 20.0354136834 | C | 8.294407196  | 0.470645281  | 14.104359858 |
| H        | 8.1512177487 | 7.5669312828  | 18.6509966066 | C | 7.062833992  | 1.185224815  | 14.071525783 |
| H        | 7.6512439197 | 7.0954087756  | 20.3129185818 | C | 9.523173036  | 2.605622762  | 14.114133999 |
| FS-G-MAH |              |               |               | C | 8.290970825  | 3.319175315  | 14.103961009 |
| C        | 2.136093333  | 2.600874842   | 13.800976618  | C | 8.288522499  | 4.743607076  | 14.124045705 |
| C        | 0.903777526  | 3.312311569   | 13.799006865  | C | 7.054066000  | 5.463306600  | 14.115765429 |
| C        | 0.901112376  | 4.734338989   | 13.801420323  | C | 7.054759891  | 6.871826958  | 14.198014223 |
| C        | -0.324018517 | 5.447065649   | 13.889848605  | C | 5.762733426  | 7.621860336  | 14.313040166 |
| C        | -0.320004549 | 6.871284844   | 13.966563661  | C | 5.827625850  | 9.036922151  | 13.832992363 |
| C        | -1.554835719 | 7.580197704   | 14.050855556  | C | 4.632126761  | 9.727172965  | 13.828527373 |
| C        | -1.551984462 | 9.001960966   | 14.093088974  | C | 4.603029036  | 11.143157375 | 13.818013192 |
| C        | -2.785931959 | 9.712244121   | 14.108010452  | C | 3.376755757  | 11.843551868 | 13.985198570 |
| C        | -2.787308906 | 11.135583204  | 14.108032625  | C | 3.371232603  | 13.261541918 | 13.980896389 |
| C        | -4.020471834 | 11.846032934  | 14.060390069  | C | 2.139389499  | 13.976273605 | 14.061892386 |
| C        | -4.019910314 | 13.268677069  | 14.025170556  | C | 10.757412962 | 0.467632335  | 14.070841181 |
| C        | -5.249697583 | 13.978753134  | 13.945073552  | C | 9.525658658  | 1.181901073  | 14.104363093 |
| C        | 3.369989637  | 0.470945938   | 13.902426350  | C | 11.988385361 | 2.603309089  | 14.060963995 |
| C        | 2.138370543  | 1.180686420   | 13.838548679  | C | 10.756579896 | 3.316004278  | 14.113555521 |
| C        | 4.598544862  | 2.605131941   | 13.897995020  | C | 10.757114079 | 4.737138936  | 14.135885285 |
| C        | 3.368935079  | 3.309590208   | 13.806484436  | C | 9.520222262  | 5.450448101  | 14.150347745 |
| C        | 3.366411169  | 4.731629022   | 13.760085542  | C | 9.515932696  | 6.870723409  | 14.133990946 |
| C        | 2.134119101  | 5.443031369   | 13.756663513  | C | 8.273755002  | 7.578658393  | 14.129485793 |
| C        | 2.129064598  | 6.862271295   | 13.823207643  | C | 8.287484217  | 9.008373881  | 13.998051588 |
| C        | 0.908534878  | 7.574845290   | 13.968037257  | C | 7.068315563  | 9.719870745  | 13.825992828 |
| C        | 0.923027875  | 9.003096002   | 14.100952930  | C | 7.066734661  | 11.140139158 | 13.753673428 |
| C        | -0.317317447 | 9.712211049   | 14.109851592  | C | 5.834001839  | 11.851933366 | 13.750140569 |



|           |              |              |              |   |              |              |              |
|-----------|--------------|--------------|--------------|---|--------------|--------------|--------------|
| C         | 5.831310302  | 13.274141117 | 13.799928163 | C | 1.007388711  | 4.730745118  | 14.077654664 |
| C         | 4.601283451  | 13.978694986 | 13.894290780 | C | -0.223398227 | 5.435846580  | 14.009469305 |
| C         | 13.219037734 | 0.471901327  | 13.938781511 | C | -0.222077108 | 6.855020772  | 14.010371775 |
| C         | 11.989425610 | 1.181701104  | 14.027327554 | C | -1.453232205 | 7.567488950  | 13.942736807 |
| C         | 14.449958711 | 2.605134965  | 13.941866389 | C | -1.453100232 | 8.987315039  | 13.945136324 |
| C         | 13.220160392 | 3.315074378  | 14.024471374 | C | -2.682831774 | 9.699418203  | 13.901141834 |
| C         | 13.221256959 | 4.737729365  | 14.061283026 | C | -2.684332542 | 11.122063042 | 13.893963171 |
| C         | 11.987722147 | 5.447498109  | 14.115480438 | C | -3.914612343 | 11.832575568 | 13.878039951 |
| C         | 11.984955076 | 6.870833956  | 14.118216321 | C | -3.916487692 | 13.255314557 | 13.879238135 |
| C         | 10.750402741 | 7.580811231  | 14.113525677 | C | -5.147945649 | 13.966311855 | 13.892572404 |
| C         | 10.753193988 | 9.003050844  | 14.071983261 | C | 3.471012057  | 0.461032757  | 13.925900220 |
| C         | 9.518251147  | 9.712558215  | 13.992523239 | C | 2.239910606  | 1.175961099  | 13.952725114 |
| C         | 9.524422861  | 11.136225397 | 13.902622412 | C | 4.699449700  | 2.593718488  | 14.010456812 |
| C         | 8.299495025  | 11.849102698 | 13.805105878 | C | 3.473452097  | 3.307166332  | 14.077715143 |
| C         | 8.296747086  | 13.271371654 | 13.798551657 | C | 3.485639316  | 4.729082730  | 14.240951460 |
| C         | 7.064394968  | 13.982893470 | 13.796549289 | C | 2.232806938  | 5.452239143  | 14.238703104 |
| C         | 15.681687754 | 0.473446824  | 13.834480707 | C | 2.217663189  | 6.848789381  | 14.324925898 |
| C         | 14.449931674 | 1.183261383  | 13.897562883 | C | 1.009519397  | 7.560661392  | 14.133482124 |
| C         | -0.327384459 | 2.604278693  | 13.835615174 | C | 1.006923458  | 8.990397603  | 14.093040850 |
| C         | -1.557963232 | 3.316021160  | 13.898243424 | C | -0.216035606 | 9.696267323  | 13.989981440 |
| C         | -1.556967663 | 4.737686698  | 13.937261178 | C | -0.220429538 | 11.122102638 | 13.938249858 |
| C         | -2.786707046 | 5.447323672  | 14.025334181 | C | -1.451507597 | 11.832195027 | 13.901358799 |
| C         | -2.785870931 | 6.871315616  | 14.066443409 | C | -1.453459792 | 13.254723783 | 13.884936010 |
| C         | -4.020480641 | 7.580538770  | 14.104376452 | C | -2.685397658 | 13.966105136 | 13.882690827 |
| C         | -4.020113043 | 9.002474479  | 14.103963499 | C | 5.930993368  | 0.459972777  | 13.902812957 |
| C         | -5.254619098 | 9.712128197  | 14.075673081 | C | 4.699876326  | 1.169652565  | 13.939792398 |
| C         | -5.252167556 | 11.136099047 | 14.030945350 | C | 7.160192307  | 2.594607579  | 13.946734274 |
| C         | -6.481724847 | 11.846109968 | 13.944593638 | C | 5.927547640  | 3.304457572  | 14.014979613 |
| C         | -6.481027354 | 13.267740331 | 13.901769613 | C | 5.923114396  | 4.723886929  | 14.140885777 |
| C         | -7.711546825 | 13.979513143 | 13.837451748 | C | 4.702285892  | 5.414260856  | 14.331810793 |
| C         | 0.906190068  | 0.471484969  | 13.826379998 | C | 4.771519146  | 6.826598874  | 14.852168501 |
| C         | -0.325449797 | 1.182550899  | 13.824989136 | C | 3.403670953  | 7.616095078  | 14.847524173 |
| C         | 5.010429613  | 6.719700743  | 16.684188237 | C | 3.468451212  | 9.013918952  | 14.284621256 |
| C         | 5.293216354  | 7.986561350  | 15.920139158 | C | 2.248114398  | 9.701922573  | 14.098956990 |
| C         | 3.978548374  | 8.746360910  | 15.915126514 | C | 2.242334490  | 11.122158400 | 13.978004065 |
| C         | 3.017464858  | 7.871932343  | 16.676639027 | C | 1.009289681  | 11.832193960 | 13.928712754 |
| H         | 6.149128373  | 8.522064763  | 16.343409017 | C | 1.008069987  | 13.255341239 | 13.898437574 |
| H         | 4.012393063  | 9.757107330  | 16.334374311 | C | -0.222982113 | 13.966319203 | 13.886217342 |
| O         | 5.772194134  | 5.848910641  | 17.013510482 | C | 8.393021583  | 0.461535604  | 13.888474558 |
| O         | 1.880702542  | 8.098877441  | 16.998639248 | C | 7.161615369  | 1.171746733  | 13.907153059 |
| O         | 3.639057033  | 6.649589488  | 16.987561978 | C | 9.620956704  | 2.595413932  | 13.898835873 |
| FS-G-DMBD |              |              |              | C | 8.389669154  | 3.304426334  | 13.944738235 |
| C         | 2.242634682  | 2.596670053  | 14.016705015 | C | 8.385151614  | 4.730314581  | 13.989787157 |
| C         | 1.007484268  | 3.309537193  | 14.018541198 | C | 7.162590445  | 5.436432676  | 14.098991734 |

C 7.158030803 6.866974938 14.105580257  
C 5.951928214 7.580226662 14.290836051  
C 5.936172983 8.974367226 14.197377364  
C 4.684081376 9.697367546 14.195429501  
C 4.696165300 11.119656441 14.043891066  
C 3.470499056 11.833024278 13.981155216  
C 3.469728319 13.258054370 13.930289081  
C 2.238611250 13.967718929 13.896407104  
C 10.855354558 0.461620852 13.882528285  
C 9.623387231 1.172921188 13.885237358  
C 12.084168852 2.594889486 13.877069104  
C 10.853839936 3.305309455 13.887595041  
C 10.852164303 4.728150701 13.891837844  
C 9.622041153 5.439443000 13.932826805  
C 9.621893287 6.859405202 13.925627896  
C 8.390697453 7.572337240 13.980915259  
C 8.392585787 8.991281061 13.983045161  
C 7.161815538 9.696069730 14.044834479  
C 7.162130487 11.117273183 14.001893936  
C 5.926739423 11.830514929 14.002590417  
C 5.929866402 13.251674771 13.956276060  
C 4.698556282 13.966818581 13.930853869  
C 13.317949525 0.461707346 13.905298509  
C 12.086334268 1.172193662 13.884581144  
C 14.548492866 2.593591578 13.901958000  
C 13.317105347 3.304714102 13.880120752  
C 13.317220385 4.726205566 13.876647859  
C 12.085319228 5.437735455 13.874225054  
C 12.086103576 6.859174734 13.876140570  
C 10.855135219 7.569988643 13.891915033  
C 10.856861843 8.991825120 13.892188118  
C 9.626921190 9.703190941 13.928091911  
C 9.626173541 11.121914126 13.925012784  
C 8.391081451 11.830535322 13.952432350  
C 8.393396400 13.254676496 13.940005325  
C 7.161818140 13.965717791 13.943473732  
C 15.781759470 0.460426738 13.931419659  
C 14.549101294 1.172289640 13.912720516  
C -0.221702967 2.596708606 13.959262277  
C -1.456315900 3.305575061 13.933760413  
C -1.456920697 4.724148039 13.941554804  
C -2.687044270 5.435512589 13.898730531  
C -2.685897287 6.857325408 13.900960316  
C -3.916694694 7.568865815 13.881193176

C -3.915593388 8.990196958 13.882096126  
C -5.147489030 9.701565225 13.878717329  
C -5.147740964 11.123102294 13.880100921  
C -6.378825859 11.834493777 13.896132684  
C -6.379240749 13.256186851 13.900674682  
C -7.612030314 13.967796379 13.923064362  
C 1.007914881 0.462285262 13.937143630  
C -0.223648532 1.173113198 13.941823869  
C 4.069387720 8.572028563 17.143015538  
O 4.015196243 9.876864352 17.551593631  
C 5.250091348 7.891978565 17.146072712  
O 6.404556558 8.500979107 17.556355518  
C 5.220371201 6.603267254 16.418181017  
H 6.188583331 6.096497678 16.405477533  
H 4.485333612 5.904494573 16.840491137  
C 2.974759617 7.897716103 16.410283161  
H 2.051753547 8.482379602 16.389643570  
H 2.734863700 6.912611706 16.833107913  
C 2.727323612 10.498936954 17.628474582  
C 7.582878865 7.692437031 17.650266421  
H 2.902854382 11.487648641 18.066221475  
H 2.042150295 9.923536589 18.272412115  
H 2.277916421 10.624798067 16.630503126  
H 8.349778895 8.337956871 18.091733845  
H 7.924091935 7.357777451 16.657441407  
H 7.415277744 6.816432220 18.298264382  
FS-G/Cu-MAH  
Cu 1.017585624 3.315140400 10.955214171  
Cu 2.263977590 2.598785778 8.857149429  
Cu 1.022040754 1.877670712 6.750759000  
Cu -0.223409553 5.472025036 10.958021852  
Cu 1.021476427 4.752660078 8.854254644  
Cu -0.221076590 4.031164483 6.750759000  
Cu -1.461679566 7.625695054 10.969766983  
Cu -0.217346900 6.908005834 8.861337934  
Cu -1.464193934 6.184658254 6.750759000  
Cu -2.707387111 9.776945769 10.975651286  
Cu -1.463738752 9.058950929 8.862869774  
Cu -2.707311278 8.338152025 6.750759000  
Cu -3.951794175 11.929474139 10.975569181  
Cu -2.708346735 11.210366634 8.867137095  
Cu -3.950428621 10.491645797 6.750759000  
Cu -5.194545288 14.083188859 10.970665073  
Cu -3.950797240 13.363963740 8.867789138

|    |              |              |              |    |              |              |              |
|----|--------------|--------------|--------------|----|--------------|--------------|--------------|
| Cu | -5.193545965 | 12.645139568 | 6.750759000  | Cu | 8.482442405  | 0.442270010  | 8.864270169  |
| Cu | 2.262401826  | 1.162391355  | 10.960877049 | Cu | -1.463915928 | 14.798793834 | 6.750759000  |
| Cu | 3.507754134  | 0.443880875  | 8.861473231  | Cu | 8.482431302  | 3.316051729  | 10.974852249 |
| Cu | -6.436663309 | 14.798633339 | 6.750759000  | Cu | 9.724361040  | 2.597972900  | 8.866197923  |
| Cu | 3.508161055  | 3.314953957  | 10.951823711 | Cu | 8.481161827  | 1.877911455  | 6.750759000  |
| Cu | 4.754803832  | 2.596777944  | 8.858892377  | Cu | 7.239946947  | 5.470330234  | 10.984782736 |
| Cu | 3.508414445  | 1.877750960  | 6.750759000  | Cu | 8.479430403  | 4.752967657  | 8.868027391  |
| Cu | 2.263164670  | 5.466659130  | 10.943997889 | Cu | 7.238044483  | 4.031405226  | 6.750759000  |
| Cu | 3.512206610  | 4.753332004  | 8.855083925  | Cu | 6.005903520  | 7.618533181  | 11.008936754 |
| Cu | 2.265297101  | 4.031244731  | 6.750759000  | Cu | 7.234363359  | 6.907437121  | 8.873371252  |
| Cu | 1.022932766  | 7.628126561  | 10.969101465 | Cu | 5.994927139  | 6.184898997  | 6.750759000  |
| Cu | 2.270574950  | 6.910941809  | 8.871793891  | Cu | 4.751678225  | 9.771388267  | 11.045236652 |
| Cu | 1.022179757  | 6.184738502  | 6.750759000  | Cu | 5.985611717  | 9.058142279  | 8.885738876  |
| Cu | -0.221907547 | 9.779358538  | 10.974411467 | Cu | 4.751809795  | 8.338392768  | 6.750759000  |
| Cu | 1.023933668  | 9.063645728  | 8.871978994  | Cu | 3.505373522  | 11.927672125 | 10.969717967 |
| Cu | -0.220937587 | 8.338232273  | 6.750759000  | Cu | 4.749587429  | 11.202753720 | 8.874987941  |
| Cu | -1.464762955 | 11.930588088 | 10.976454395 | Cu | 3.508692451  | 10.491886539 | 6.750759000  |
| Cu | -0.224707755 | 11.213259827 | 8.863619222  | Cu | 2.265362108  | 14.079078097 | 10.971570633 |
| Cu | -1.464054931 | 10.491726044 | 6.750759000  | Cu | 3.507844036  | 13.359378269 | 8.861192341  |
| Cu | -2.707750786 | 14.084291717 | 10.975091401 | Cu | 2.265575107  | 12.645380311 | 6.750759000  |
| Cu | -1.464441971 | 13.365200898 | 8.866729856  | Cu | 9.724975477  | 1.160540580  | 10.973529782 |
| Cu | -2.707172275 | 12.645219815 | 6.750759000  | Cu | 10.967176672 | 0.442131001  | 8.864243971  |
| Cu | 4.751271503  | 1.162927781  | 10.965475426 | Cu | 1.022457763  | 14.798874082 | 6.750759000  |
| Cu | 5.995705825  | 0.442262859  | 8.862856106  | Cu | 10.965266569 | 3.315686672  | 10.978456980 |
| Cu | -3.950289618 | 14.798713587 | 6.750759000  | Cu | 12.208023062 | 2.599203104  | 8.867510729  |
| Cu | 5.999829502  | 3.315663616  | 10.966302429 | Cu | 10.967535518 | 1.877991703  | 6.750759000  |
| Cu | 7.241145401  | 2.595132536  | 8.861990670  | Cu | 9.723048764  | 5.470243600  | 10.979753751 |
| Cu | 5.994788136  | 1.877831207  | 6.750759000  | Cu | 10.963894765 | 4.752982314  | 8.868417270  |
| Cu | 4.757323014  | 5.466761827  | 10.960397811 | Cu | 9.724418174  | 4.031485474  | 6.750759000  |
| Cu | 5.997929346  | 4.752053176  | 8.861554448  | Cu | 8.482250074  | 7.622261866  | 10.987736695 |
| Cu | 4.751670792  | 4.031324978  | 6.750759000  | Cu | 9.721951956  | 6.904967131  | 8.868574306  |
| Cu | 3.514654020  | 7.627715010  | 11.028066619 | Cu | 8.481300830  | 6.184979245  | 6.750759000  |
| Cu | 4.748250200  | 6.912703673  | 8.882732720  | Cu | 7.244486345  | 9.774138776  | 10.962448959 |
| Cu | 3.508553448  | 6.184818750  | 6.750759000  | Cu | 8.482564563  | 9.054610507  | 8.862316345  |
| Cu | 2.266192234  | 9.778049635  | 11.032755379 | Cu | 7.238183486  | 8.338473016  | 6.750759000  |
| Cu | 3.506229290  | 9.060666594  | 8.904115954  | Cu | 5.997607945  | 11.936109255 | 10.943821333 |
| Cu | 2.265436104  | 8.338312521  | 6.750759000  | Cu | 7.238400644  | 11.206497650 | 8.855791151  |
| Cu | 1.020182234  | 11.930621732 | 10.975404016 | Cu | 5.995066142  | 10.491966787 | 6.750759000  |
| Cu | 2.261196105  | 11.207098550 | 8.871420760  | Cu | 4.747838077  | 14.083701773 | 10.959692747 |
| Cu | 1.022318760  | 10.491806292 | 6.750759000  | Cu | 5.993281395  | 13.364696478 | 8.853686441  |
| Cu | -0.220566232 | 14.083001092 | 10.975285356 | Cu | 4.751948798  | 12.645460558 | 6.750759000  |
| Cu | 1.021489185  | 13.363371343 | 8.862900183  | Cu | 12.208333612 | 1.161958902  | 10.971849633 |
| Cu | -0.220798584 | 12.645300063 | 6.750759000  | Cu | 13.450905078 | 0.444613404  | 8.860521637  |
| Cu | 7.239751678  | 1.161438710  | 10.972344489 | Cu | 3.508831454  | 14.798954329 | 6.750759000  |

|    |              |              |              |   |              |              |              |
|----|--------------|--------------|--------------|---|--------------|--------------|--------------|
| Cu | 13.450989146 | 3.316740141  | 10.974988439 | C | 0.938659582  | 4.819391327  | 13.959443990 |
| Cu | 14.692879995 | 2.599971848  | 8.861942960  | C | -0.299938520 | 5.540994284  | 14.002588128 |
| Cu | 13.453909208 | 1.878071950  | 6.750759000  | C | -0.294904248 | 6.980106789  | 14.019187096 |
| Cu | 12.208985097 | 5.470867001  | 10.978323070 | C | -1.541162844 | 7.697145274  | 14.054762756 |
| Cu | 13.451197541 | 4.752573982  | 8.867370136  | C | -1.534468875 | 9.132113500  | 14.063481237 |
| Cu | 12.210791865 | 4.031565721  | 6.750759000  | C | -2.778645241 | 9.849762737  | 14.076499642 |
| Cu | 10.967150814 | 7.622431833  | 10.975929214 | C | -2.779061936 | 11.285582111 | 14.084678293 |
| Cu | 12.210110965 | 6.903971611  | 8.866421261  | C | -4.022735578 | 12.003498618 | 14.074943894 |
| Cu | 10.967674521 | 6.185059492  | 6.750759000  | C | -4.022492319 | 13.438950719 | 14.065947747 |
| Cu | 9.727769275  | 9.773119605  | 10.969175944 | C | -5.266352871 | 14.157342842 | 14.050131030 |
| Cu | 10.971436284 | 9.055889142  | 8.862556220  | C | 3.433903932  | 0.517811080  | 14.035460434 |
| Cu | 9.724557177  | 8.338553264  | 6.750759000  | C | 2.189445085  | 1.234955831  | 14.022254949 |
| Cu | 8.482071898  | 11.930503117 | 10.953578658 | C | 4.673975249  | 2.669520100  | 14.003712715 |
| Cu | 9.726689617  | 11.208063082 | 8.859518089  | C | 3.429458478  | 3.381577073  | 13.960451306 |
| Cu | 8.481439833  | 10.492047035 | 6.750759000  | C | 3.425709240  | 4.815278626  | 13.892024231 |
| Cu | 7.236786366  | 14.088019507 | 10.955710865 | C | 2.181714284  | 5.533401137  | 13.891153275 |
| Cu | 8.479400218  | 13.364333841 | 8.857436145  | C | 2.177795146  | 6.967284406  | 13.893615474 |
| Cu | 7.238322489  | 12.645540806 | 6.750759000  | C | 0.942781527  | 7.691862699  | 14.003781616 |
| Cu | 14.692867285 | 1.163853814  | 10.964185198 | C | 0.962948236  | 9.134786563  | 14.083706926 |
| Cu | 15.936996510 | 0.446555008  | 8.857851202  | C | -0.287628874 | 9.849772021  | 14.073540362 |
| Cu | 5.995205145  | 14.799034577 | 6.750759000  | C | -0.290938450 | 11.283970348 | 14.093049432 |
| Cu | -1.468750333 | 3.317345248  | 10.963937114 | C | -1.536491429 | 12.002651099 | 14.092063833 |
| Cu | -0.225229863 | 2.598810982  | 8.857947150  | C | -1.536578988 | 13.437374570 | 14.084846930 |
| Cu | 15.940282899 | 1.878152198  | 6.750759000  | C | -2.779636746 | 14.157034946 | 14.072944084 |
| Cu | -2.709053790 | 5.470536046  | 10.971121141 | C | 5.920710444  | 0.517189320  | 14.060918140 |
| Cu | -1.466365957 | 4.752969912  | 8.860202128  | C | 4.676934600  | 1.235488789  | 14.036451027 |
| Cu | 14.697165555 | 4.031645969  | 6.750759000  | C | 7.161167170  | 2.672668396  | 14.057035793 |
| Cu | -3.949930597 | 7.622785707  | 10.973582607 | C | 5.917279697  | 3.393556841  | 14.022646231 |
| Cu | -2.706502309 | 6.904940501  | 8.864160098  | C | 5.914449123  | 4.821538982  | 14.007638756 |
| Cu | 13.454048211 | 6.185139740  | 6.750759000  | C | 4.669311985  | 5.529146333  | 13.896558181 |
| Cu | -5.192368926 | 9.774878947  | 10.973878342 | C | 4.638270775  | 6.955473039  | 13.876431541 |
| Cu | -3.948723250 | 9.056345830  | 8.864756444  | C | 3.429087944  | 7.655340973  | 13.869565918 |
| Cu | 12.210930867 | 8.338633511  | 6.750759000  | C | 3.506234875  | 9.093713210  | 14.331473253 |
| Cu | -6.437953072 | 11.929076987 | 10.966330448 | C | 2.194532263  | 9.848278799  | 14.159760068 |
| Cu | -5.192156259 | 11.209623628 | 8.863154638  | C | 2.196674788  | 11.272059661 | 14.097812804 |
| Cu | 10.967813524 | 10.492127282 | 6.750759000  | C | 0.951922173  | 11.999305385 | 14.084062797 |
| Cu | -7.682147843 | 14.084471042 | 10.961273466 | C | 0.950513595  | 13.437788066 | 14.075586887 |
| Cu | -6.437712270 | 13.363660104 | 8.861418899  | C | -0.293287527 | 14.155741756 | 14.080120863 |
| Cu | 9.724696180  | 12.645621053 | 6.750759000  | C | 8.405768694  | 0.518578215  | 14.074569181 |
| Cu | -0.224973857 | 1.163998842  | 10.961440945 | C | 7.162646829  | 1.237718923  | 14.066922190 |
| Cu | 1.019611232  | 0.444390934  | 8.858373474  | C | 9.644188793  | 2.676851519  | 14.079386873 |
| Cu | 8.481578836  | 14.799114825 | 6.750759000  | C | 8.400614050  | 3.395798894  | 14.068581178 |
| C  | 2.186686558  | 2.668262266  | 13.988945791 | C | 8.398391702  | 4.834422582  | 14.080703116 |
| C  | 0.942679945  | 3.386311884  | 13.988918543 | C | 7.153735310  | 5.560213513  | 14.092788182 |

|   |              |              |              |              |              |              |              |
|---|--------------|--------------|--------------|--------------|--------------|--------------|--------------|
| C | 7.156523323  | 6.983201754  | 14.170581117 | C            | -4.024180529 | 9.133052677  | 14.076055083 |
| C | 5.846333617  | 7.742579346  | 14.335310116 | C            | -5.268111124 | 9.851126388  | 14.075703554 |
| C | 5.923051813  | 9.178407507  | 13.855301900 | C            | -5.265446928 | 11.287047545 | 14.067879317 |
| C | 4.709816646  | 9.876750592  | 13.845546167 | C            | -6.508831926 | 12.005409620 | 14.045055211 |
| C | 4.681941917  | 11.303487874 | 13.897197736 | C            | -6.509298151 | 13.441076043 | 14.038302809 |
| C | 3.437993011  | 12.010718615 | 14.027076366 | C            | -7.752369414 | 14.161072863 | 14.025769911 |
| C | 3.434771245  | 13.440729868 | 14.038014150 | C            | 0.946876372  | 0.520209111  | 14.028332819 |
| C | 2.190643472  | 14.161255637 | 14.069332950 | C            | -0.297133349 | 1.238481206  | 14.028453286 |
| C | 10.890636720 | 0.521494084  | 14.075065358 | C            | 5.095876601  | 6.847354059  | 16.710151277 |
| C | 9.646805320  | 1.239584922  | 14.077288846 | C            | 5.376812916  | 8.093396738  | 15.904287728 |
| C | 12.131796462 | 2.676069126  | 14.076224139 | C            | 4.038780786  | 8.867371100  | 15.901098396 |
| C | 10.888044697 | 3.394207010  | 14.088308024 | C            | 3.098142641  | 8.005350305  | 16.709021978 |
| C | 10.887561263 | 4.829163553  | 14.096767182 | H            | 6.208444902  | 8.644776231  | 16.360227690 |
| C | 9.642241343  | 5.548583023  | 14.100871495 | H            | 4.102162113  | 9.864409852  | 16.354577128 |
| C | 9.640145353  | 6.982676732  | 14.090830871 | O            | 5.854205143  | 5.969935419  | 17.030463151 |
| C | 8.387858165  | 7.697459213  | 14.106556271 | O            | 1.960382954  | 8.227371770  | 17.031390876 |
| C | 8.406737587  | 9.141490491  | 14.030440717 | O            | 3.738914774  | 6.808174214  | 17.071161110 |
| C | 7.171821223  | 9.865510849  | 13.901241725 | FS-G/Cu-DMBD |              |              |              |
| C | 7.170336615  | 11.300918261 | 13.893908568 | Cu           | 1.023907896  | 3.315598239  | 10.970272288 |
| C | 5.925760492  | 12.019716219 | 13.893019084 | Cu           | 2.265605905  | 2.595061643  | 8.860255593  |
| C | 5.922599373  | 13.452955444 | 13.967059728 | Cu           | 1.022195002  | 1.877689897  | 6.750759000  |
| C | 4.677867420  | 14.164737096 | 14.015286772 | Cu           | -0.221309574 | 5.466103697  | 10.966880487 |
| C | 13.376673280 | 0.523938288  | 14.044167015 | Cu           | 1.028415817  | 4.752599630  | 8.867557723  |
| C | 12.133107050 | 1.241475460  | 14.068788187 | Cu           | -0.220992195 | 4.031141533  | 6.750759000  |
| C | 14.618611403 | 2.675630273  | 14.050163382 | Cu           | -1.465515175 | 7.619243556  | 10.959770086 |
| C | 13.374685645 | 3.393731108  | 14.068144241 | Cu           | -0.217201557 | 6.903397358  | 8.863286379  |
| C | 13.375002001 | 4.829283071  | 14.074357687 | Cu           | -1.464179392 | 6.184593169  | 6.750759000  |
| C | 12.130176615 | 5.546394530  | 14.088464438 | Cu           | -2.708360379 | 9.772441987  | 10.962445844 |
| C | 12.130268462 | 6.982404681  | 14.082981437 | Cu           | -1.465973662 | 9.055271062  | 8.858455445  |
| C | 10.886397556 | 7.700670791  | 14.080525111 | Cu           | -2.707366589 | 8.338044805  | 6.750759000  |
| C | 10.892892843 | 9.136324508  | 14.071525403 | Cu           | -3.951255854 | 11.926025302 | 10.968393541 |
| C | 9.646959586  | 9.853682652  | 14.041186224 | Cu           | -2.709132313 | 11.209026178 | 8.861229808  |
| C | 9.652652838  | 11.292058896 | 14.016532596 | Cu           | -3.950553786 | 10.491496441 | 6.750759000  |
| C | 8.413382264  | 12.014250714 | 13.968200330 | Cu           | -5.195381879 | 14.078862729 | 10.967224776 |
| C | 8.409633718  | 13.447609858 | 13.995898160 | Cu           | -3.951132107 | 13.362410628 | 8.862135808  |
| C | 7.165840358  | 14.166032060 | 13.995812690 | Cu           | -5.193740982 | 12.644948077 | 6.750759000  |
| C | 15.864947429 | 0.524835988  | 14.024763940 | Cu           | 2.262143816  | 1.158108392  | 10.963219815 |
| C | 14.619920047 | 1.241037654  | 14.038581126 | Cu           | 3.507095314  | 0.440096447  | 8.860887260  |
| C | -0.299585057 | 2.672026914  | 14.021188038 | Cu           | -6.436928179 | 14.798399713 | 6.750759000  |
| C | -1.542892735 | 3.390908572  | 14.035750256 | Cu           | 3.506377578  | 3.312922018  | 10.969673859 |
| C | -1.542952809 | 4.826310870  | 14.035779630 | Cu           | 4.749885205  | 2.593796785  | 8.859295105  |
| C | -2.786663465 | 5.544418387  | 14.061868692 | Cu           | 3.508822716  | 1.877836171  | 6.750759000  |
| C | -2.784013000 | 6.980499442  | 14.066237860 | Cu           | 2.266148112  | 5.471194839  | 10.991744049 |
| C | -4.028223169 | 7.697875016  | 14.075780103 | Cu           | 3.511804242  | 4.752565211  | 8.879425306  |

|    |              |              |              |    |              |              |              |
|----|--------------|--------------|--------------|----|--------------|--------------|--------------|
| Cu | 2.265635519  | 4.031287807  | 6.750759000  | Cu | 7.228378965  | 6.908538452  | 8.875311968  |
| Cu | 1.022780480  | 7.621251424  | 10.979722083 | Cu | 5.995703749  | 6.185031989  | 6.750759000  |
| Cu | 2.271416339  | 6.905175859  | 8.881377504  | Cu | 4.747458829  | 9.770079319  | 10.987074619 |
| Cu | 1.022448322  | 6.184739443  | 6.750759000  | Cu | 5.994120300  | 9.050198380  | 8.879508203  |
| Cu | -0.222455659 | 9.773509082  | 10.964884160 | Cu | 4.752516552  | 8.338483625  | 6.750759000  |
| Cu | 1.022200002  | 9.054755733  | 8.865635128  | Cu | 3.508608556  | 11.926257644 | 10.965801749 |
| Cu | -0.220738875 | 8.338191078  | 6.750759000  | Cu | 4.752541099  | 11.201875205 | 8.866520230  |
| Cu | -1.463973115 | 11.926631387 | 10.962229643 | Cu | 3.509329356  | 10.491935261 | 6.750759000  |
| Cu | -0.222001548 | 11.209107580 | 8.858319624  | Cu | 2.266493508  | 14.081329443 | 10.961796587 |
| Cu | -1.463926072 | 10.491642714 | 6.750759000  | Cu | 3.509623852  | 13.359763419 | 8.859832804  |
| Cu | -2.707271318 | 14.078550882 | 10.964338390 | Cu | 2.266142159  | 12.645386897 | 6.750759000  |
| Cu | -1.463528851 | 13.363304023 | 8.858613532  | Cu | 9.725513725  | 1.161011636  | 10.961266544 |
| Cu | -2.707113269 | 12.645094350 | 6.750759000  | Cu | 10.969478996 | 0.443610718  | 8.859831285  |
| Cu | 4.751009396  | 1.158281512  | 10.963306244 | Cu | 1.022954962  | 14.798838533 | 6.750759000  |
| Cu | 5.995418377  | 0.441962374  | 8.859081346  | Cu | 10.966400374 | 3.313504113  | 10.963780059 |
| Cu | -3.950300466 | 14.798545986 | 6.750759000  | Cu | 12.210412873 | 2.596981701  | 8.861190195  |
| Cu | 5.990781678  | 3.313496054  | 10.962925333 | Cu | 10.968705857 | 1.878274991  | 6.750759000  |
| Cu | 7.235754455  | 2.599215407  | 8.859125323  | Cu | 9.721496679  | 5.467374254  | 10.963542358 |
| Cu | 5.995450429  | 1.877982444  | 6.750759000  | Cu | 10.964966177 | 4.750049470  | 8.859629249  |
| Cu | 4.746655129  | 5.472922034  | 11.045684481 | Cu | 9.725518660  | 4.031726627  | 6.750759000  |
| Cu | 5.984607355  | 4.755498741  | 8.875415858  | Cu | 8.478576176  | 7.622844296  | 10.961995189 |
| Cu | 4.752263232  | 4.031434080  | 6.750759000  | Cu | 9.721440994  | 6.903264689  | 8.858894999  |
| Cu | 3.502578761  | 7.622862171  | 11.063058896 | Cu | 8.482331463  | 6.185178263  | 6.750759000  |
| Cu | 4.748935848  | 6.903742155  | 8.907660439  | Cu | 7.236294341  | 9.774190212  | 10.969067280 |
| Cu | 3.509076035  | 6.184885716  | 6.750759000  | Cu | 8.483032249  | 9.058303933  | 8.859081843  |
| Cu | 2.263809516  | 9.771246988  | 10.977216684 | Cu | 7.239144266  | 8.338629899  | 6.750759000  |
| Cu | 3.509185652  | 9.047615348  | 8.880505096  | Cu | 5.993073415  | 11.922593821 | 10.970010944 |
| Cu | 2.265888839  | 8.338337352  | 6.750759000  | Cu | 7.239571316  | 11.208785649 | 8.860249938  |
| Cu | 1.022390575  | 11.927187247 | 10.958291549 | Cu | 5.995957069  | 10.492081535 | 6.750759000  |
| Cu | 2.266792497  | 11.204287171 | 8.862510119  | Cu | 4.752296895  | 14.079866181 | 10.963496512 |
| Cu | 1.022701642  | 10.491788988 | 6.750759000  | Cu | 5.994623530  | 13.360113958 | 8.861807343  |
| Cu | -0.220046434 | 14.080924783 | 10.961436997 | Cu | 4.752769872  | 12.645533171 | 6.750759000  |
| Cu | 1.024394990  | 13.362634412 | 8.858314217  | Cu | 12.211327572 | 1.159780872  | 10.968248683 |
| Cu | -0.220485555 | 12.645240624 | 6.750759000  | Cu | 13.454192983 | 0.442315983  | 8.861902147  |
| Cu | 7.238363701  | 1.159606547  | 10.958785859 | Cu | 3.509582676  | 14.798984807 | 6.750759000  |
| Cu | 8.483028180  | 0.443752526  | 8.857641701  | Cu | 13.453868241 | 3.312330139  | 10.968191066 |
| Cu | -1.463672752 | 14.798692260 | 6.750759000  | Cu | 14.698221561 | 2.597050606  | 8.862094327  |
| Cu | 8.478921985  | 3.314769445  | 10.964044497 | Cu | 13.455333571 | 1.878421264  | 6.750759000  |
| Cu | 9.722770074  | 2.598929965  | 8.859491268  | Cu | 12.209686840 | 5.465025845  | 10.961863606 |
| Cu | 8.482078143  | 1.878128718  | 6.750759000  | Cu | 13.454662586 | 4.747991928  | 8.860271957  |
| Cu | 7.234401383  | 5.468092213  | 10.966652801 | Cu | 12.212146374 | 4.031872900  | 6.750759000  |
| Cu | 8.474619020  | 4.753767615  | 8.860199149  | Cu | 10.967295693 | 7.619717559  | 10.958499578 |
| Cu | 7.238890946  | 4.031580353  | 6.750759000  | Cu | 12.211371917 | 6.900452429  | 8.857742868  |
| Cu | 5.985189853  | 7.619611397  | 11.044066444 | Cu | 10.968959177 | 6.185324536  | 6.750759000  |

|    |              |              |              |   |              |              |              |
|----|--------------|--------------|--------------|---|--------------|--------------|--------------|
| Cu | 9.724716100  | 9.774081030  | 10.962601045 | C | -5.223243056 | 14.061514012 | 14.059919584 |
| Cu | 10.969064141 | 9.055216896  | 8.858799059  | C | 3.479126834  | 0.421933512  | 14.045146414 |
| Cu | 9.725771980  | 8.338776172  | 6.750759000  | C | 2.236202453  | 1.142406874  | 14.038711414 |
| Cu | 8.480258777  | 11.928847853 | 10.962837906 | C | 4.722044787  | 2.574352469  | 14.014619507 |
| Cu | 9.726491947  | 11.211136488 | 8.860649265  | C | 3.481016785  | 3.295244140  | 14.031664594 |
| Cu | 8.482584783  | 10.492227808 | 6.750759000  | C | 3.490852141  | 4.731888982  | 14.102030138 |
| Cu | 7.236818454  | 14.079653479 | 10.965021540 | C | 2.230290221  | 5.459107801  | 14.102703293 |
| Cu | 8.481315741  | 13.364503083 | 8.859428966  | C | 2.217759944  | 6.873848687  | 14.140945427 |
| Cu | 7.239397586  | 12.645679444 | 6.750759000  | C | 0.991956827  | 7.595268317  | 14.029732074 |
| Cu | 14.697238918 | 1.159216192  | 10.969360609 | C | 0.991243853  | 9.040292315  | 14.027662839 |
| Cu | 15.939680953 | 0.443597530  | 8.861230202  | C | -0.245224877 | 9.754171464  | 14.011424395 |
| Cu | 5.996210389  | 14.799131080 | 6.750759000  | C | -0.249329529 | 11.193734127 | 14.007207239 |
| Cu | -1.465216437 | 3.311611819  | 10.963787310 | C | -1.492517197 | 11.909126672 | 14.029415117 |
| Cu | -0.219565913 | 2.597834106  | 8.861760246  | C | -1.492970013 | 13.344620099 | 14.032605398 |
| Cu | 15.941961284 | 1.878567538  | 6.750759000  | C | -2.736483383 | 14.061328621 | 14.041968213 |
| Cu | -2.709375202 | 5.464527802  | 10.962269753 | C | 5.965494640  | 0.422139599  | 14.026580614 |
| Cu | -1.461713626 | 4.750055735  | 8.860173903  | C | 4.721627857  | 1.137530194  | 14.025497108 |
| Cu | 14.698774087 | 4.032019174  | 6.750759000  | C | 7.209218372  | 2.576827256  | 14.004221674 |
| Cu | -3.952547424 | 7.618227460  | 10.961717393 | C | 5.964050737  | 3.292015673  | 13.996531480 |
| Cu | -2.707195466 | 6.900032811  | 8.858576039  | C | 5.959275447  | 4.728233543  | 14.031309044 |
| Cu | 13.455586891 | 6.185470810  | 6.750759000  | C | 4.721913192  | 5.429530036  | 14.141685804 |
| Cu | -5.194292258 | 9.772722344  | 10.964388316 | C | 4.789548049  | 6.851796975  | 14.662658623 |
| Cu | -3.951892791 | 9.053566471  | 8.858770866  | C | 3.416204189  | 7.643845475  | 14.661081006 |
| Cu | 12.212399694 | 8.338922446  | 6.750759000  | C | 3.480417497  | 9.060787555  | 14.117735648 |
| Cu | -6.438481930 | 11.926647867 | 10.967200700 | C | 2.243888708  | 9.761041475  | 14.011023977 |
| Cu | -5.194834907 | 11.208017142 | 8.862052243  | C | 2.238495953  | 11.197482350 | 13.978392616 |
| Cu | 10.969212497 | 10.492374082 | 6.750759000  | C | 0.993401901  | 11.912520143 | 13.996392532 |
| Cu | -7.682152207 | 14.079206718 | 10.968272354 | C | 0.993856025  | 13.347693119 | 14.016396522 |
| Cu | -6.438525368 | 13.362523742 | 8.861293849  | C | -0.249742570 | 14.063755926 | 14.025891908 |
| Cu | 9.726025300  | 12.645825718 | 6.750759000  | C | 8.452222720  | 0.425199664  | 14.026737390 |
| Cu | -0.222931085 | 1.159399366  | 10.964870616 | C | 7.208722973  | 1.141472485  | 14.019916266 |
| Cu | 1.019876191  | 0.441800229  | 8.859590643  | C | 9.694904498  | 2.579725790  | 14.031191868 |
| Cu | 8.482838103  | 14.799277353 | 6.750759000  | C | 8.451901026  | 3.295250604  | 14.013005949 |
| C  | 2.236711180  | 2.576989240  | 14.026363065 | C | 8.447796395  | 4.735092306  | 14.014278126 |
| C  | 0.990875094  | 3.296297327  | 14.025323832 | C | 7.211705557  | 5.449134539  | 14.031331356 |
| C  | 0.991006035  | 4.733183834  | 14.029379986 | C | 7.209729968  | 6.894083757  | 14.011419508 |
| C  | -0.253922900 | 5.447447169  | 14.012609668 | C | 5.984206640  | 7.614667098  | 14.116211330 |
| C  | -0.254332763 | 6.881926468  | 13.993943899 | C | 5.971313319  | 9.028381116  | 14.077442364 |
| C  | -1.496154109 | 7.602632265  | 14.003208067 | C | 4.711504654  | 9.755497480  | 14.078857543 |
| C  | -1.494430805 | 9.038120817  | 14.010468881 | C | 4.721417268  | 11.191518328 | 14.015866121 |
| C  | -2.735933142 | 9.756285522  | 14.029634906 | C | 3.481059137  | 11.912909621 | 14.001724580 |
| C  | -2.736963126 | 11.192280348 | 14.042856752 | C | 3.480858073  | 13.349852907 | 14.020654988 |
| C  | -3.978986069 | 11.909355515 | 14.056502481 | C | 2.237380932  | 14.066137394 | 14.025743680 |
| C  | -3.979998931 | 13.344327925 | 14.055427385 | C | 10.938909701 | 0.427316566  | 14.042591124 |

|   |              |              |              |             |              |              |              |
|---|--------------|--------------|--------------|-------------|--------------|--------------|--------------|
| C | 9.695495783  | 1.144097092  | 14.034847041 | O           | 4.024917276  | 9.884679886  | 17.385046711 |
| C | 12.180829402 | 2.579751596  | 14.057095777 | C           | 5.263347191  | 7.905977815  | 16.966259181 |
| C | 10.939045518 | 3.296832389  | 14.044745191 | O           | 6.416417826  | 8.507303801  | 17.388140380 |
| C | 10.937614413 | 4.732784949  | 14.030295112 | C           | 5.229020862  | 6.619647651  | 16.228886375 |
| C | 9.696551603  | 5.451849290  | 14.010304848 | H           | 6.194808958  | 6.108436552  | 16.228736209 |
| C | 9.697668525  | 6.887170643  | 13.999303604 | H           | 4.492559545  | 5.921053767  | 16.649766507 |
| C | 8.456040058  | 7.608356661  | 13.981313421 | C           | 2.991455908  | 7.908171215  | 16.227951471 |
| C | 8.454390816  | 9.042322218  | 14.002650069 | H           | 2.062616346  | 8.483767829  | 16.226300672 |
| C | 7.209557558  | 9.755503131  | 14.016468295 | H           | 2.760147383  | 6.920313200  | 16.649299712 |
| C | 7.210167725  | 11.191755529 | 14.018824687 | C           | 2.726230315  | 10.451917760 | 17.596519962 |
| C | 5.964749059  | 11.910505677 | 14.019175394 | C           | 7.560133681  | 7.671486741  | 17.602214737 |
| C | 5.965469309  | 13.344724449 | 14.035467826 | H           | 2.900794350  | 11.423258636 | 18.072528631 |
| C | 4.722729067  | 14.065713759 | 14.044921173 | H           | 2.117599018  | 9.818282526  | 18.261308968 |
| C | 13.425216153 | 0.426358595  | 14.060844776 | H           | 2.192473078  | 10.605547680 | 16.644649551 |
| C | 12.182268241 | 1.144513061  | 14.056937191 | H           | 8.309734286  | 8.313395889  | 18.078235943 |
| C | 14.667291977 | 2.578259435  | 14.059251670 | H           | 7.963331799  | 7.287368525  | 16.651140770 |
| C | 13.424325152 | 3.296247301  | 14.056489975 | H           | 7.318798253  | 6.827212769  | 18.267901333 |
| C | 13.423830238 | 4.731429199  | 14.040827291 | FS-G/Ni-MAH |              |              |              |
| C | 12.181333435 | 5.449933087  | 14.033447332 | Ni          | 1.160043908  | 0.671987754  | 13.964308820 |
| C | 12.182496579 | 6.885704628  | 14.026502194 | Ni          | 1.161034944  | 2.097745107  | 11.974137333 |
| C | 10.940650961 | 7.605095518  | 14.018738832 | Ni          | -0.072797328 | 1.383845683  | 10.000000000 |
| C | 10.941152654 | 9.041090387  | 14.025025063 | Ni          | -0.073143056 | 2.811486558  | 13.963270480 |
| C | 9.699045686  | 9.760059088  | 14.021166580 | Ni          | -0.072173061 | 4.239064188  | 11.974517636 |
| C | 9.698048848  | 11.193484654 | 14.043758378 | Ni          | -1.306423424 | 3.522722745  | 10.000000000 |
| C | 8.452130571  | 11.908967364 | 14.036286600 | Ni          | -1.305818408 | 4.951870299  | 13.964864881 |
| C | 8.452871846  | 13.345191716 | 14.045528429 | Ni          | -1.304003336 | 6.377781464  | 11.975570087 |
| C | 7.209359420  | 14.063175803 | 14.045682798 | Ni          | -2.540049520 | 5.661599807  | 10.000000000 |
| C | 15.911850523 | 0.424919978  | 14.054564662 | Ni          | -2.541700280 | 7.087955035  | 13.963934466 |
| C | 14.667988137 | 1.143525234  | 14.063612912 | Ni          | -2.539024392 | 8.515196817  | 11.975870961 |
| C | -0.250961161 | 2.578073304  | 14.037092841 | Ni          | -3.773675616 | 7.800476868  | 10.000000000 |
| C | -1.496446929 | 3.294249619  | 14.044446932 | Ni          | -3.775453042 | 9.226152711  | 13.965883896 |
| C | -1.497628245 | 4.728077242  | 14.023771683 | Ni          | -3.772032877 | 10.652674553 | 11.976352027 |
| C | -2.739289938 | 5.447342356  | 14.025799088 | Ni          | -5.007301712 | 9.939353930  | 10.000000000 |
| C | -2.738496095 | 6.883717937  | 14.018810180 | Ni          | -5.008638858 | 11.362808598 | 13.965455052 |
| C | -3.980605977 | 7.602451721  | 14.027066662 | Ni          | -5.005278548 | 12.791112937 | 11.975147914 |
| C | -3.979528850 | 9.038607494  | 14.032946269 | Ni          | -6.240927808 | 12.078230992 | 10.000000000 |
| C | -5.222161547 | 9.757326217  | 14.041457153 | Ni          | -6.239899632 | 13.504422975 | 13.962119035 |
| C | -5.222570273 | 11.192678717 | 14.054948553 | Ni          | -6.239720512 | 14.931000481 | 11.974385863 |
| C | -6.465928194 | 11.910013395 | 14.059737425 | Ni          | -7.474553904 | 14.217108054 | 10.000000000 |
| C | -6.466057885 | 13.344533063 | 14.062703035 | Ni          | 3.631230495  | 0.671433289  | 13.962594013 |
| C | -7.709998297 | 14.062197247 | 14.054876879 | Ni          | 3.631668569  | 2.098531697  | 11.972785495 |
| C | 0.992481745  | 0.423671468  | 14.046164031 | Ni          | 2.396345600  | 1.384937289  | 10.000000000 |
| C | -0.251013936 | 1.141677001  | 14.046612413 | Ni          | 2.395146714  | 2.805842863  | 13.958255142 |
| C | 4.085061191  | 8.584671931  | 16.965615447 | Ni          | 2.395492227  | 4.236833319  | 11.966761514 |



|    |              |              |              |    |              |              |              |
|----|--------------|--------------|--------------|----|--------------|--------------|--------------|
| Ni | 1.162719504  | 3.523814351  | 10.000000000 | Ni | 6.103818606  | 6.383801844  | 11.986082515 |
| Ni | 1.164517463  | 4.955612282  | 13.956141619 | Ni | 4.867379265  | 5.664874625  | 10.000000000 |
| Ni | 1.165906966  | 6.382106732  | 11.973874765 | Ni | 4.874054674  | 7.104918917  | 13.952730652 |
| Ni | -0.070906592 | 5.662691413  | 10.000000000 | Ni | 4.862674053  | 8.520024506  | 11.964945380 |
| Ni | -0.072994003 | 7.095034241  | 13.965136624 | Ni | 3.633753169  | 7.803751687  | 10.000000000 |
| Ni | -0.065425327 | 8.518616001  | 11.980360575 | Ni | 3.649397776  | 9.229189870  | 13.997436599 |
| Ni | -1.304532688 | 7.801568475  | 10.000000000 | Ni | 3.630229504  | 10.651581425 | 11.978406718 |
| Ni | -1.301280871 | 9.229264329  | 13.965845787 | Ni | 2.400127073  | 9.942628749  | 10.000000000 |
| Ni | -1.301820510 | 10.655449693 | 11.976996393 | Ni | 2.401650710  | 11.360786019 | 13.983163601 |
| Ni | -2.538158784 | 9.940445537  | 10.000000000 | Ni | 2.400336041  | 12.791287762 | 11.981436841 |
| Ni | -2.538195219 | 11.365871710 | 13.965283918 | Ni | 1.166500977  | 12.081505811 | 10.000000000 |
| Ni | -2.536061848 | 12.792985694 | 11.975702150 | Ni | 1.170319832  | 13.503469134 | 13.970937289 |
| Ni | -3.771784880 | 12.079322598 | 10.000000000 | Ni | 1.166827245  | 14.933757289 | 11.976848005 |
| Ni | -3.770893161 | 13.505592021 | 13.963425600 | Ni | -0.067125119 | 14.220382873 | 10.000000000 |
| Ni | -3.769348349 | 14.931818335 | 11.975188696 | Ni | 11.037459989 | 0.677642097  | 13.964471228 |
| Ni | -5.005410976 | 14.218199660 | 10.000000000 | Ni | 11.037091538 | 2.102690044  | 11.973860719 |
| Ni | 6.101932901  | 0.675164887  | 13.964825988 | Ni | 9.803774385  | 1.388212108  | 10.000000000 |
| Ni | 6.101953249  | 2.100860966  | 11.976417089 | Ni | 9.802925522  | 2.815658856  | 13.964300983 |
| Ni | 4.865488528  | 1.386028896  | 10.000000000 | Ni | 9.802867068  | 4.241876046  | 11.975714894 |
| Ni | 4.868472123  | 2.811332555  | 13.958287218 | Ni | 8.570148289  | 3.527089170  | 10.000000000 |
| Ni | 4.870916095  | 4.239873777  | 11.969719595 | Ni | 8.571456008  | 4.956966772  | 13.974486944 |
| Ni | 3.631862432  | 3.524905957  | 10.000000000 | Ni | 8.568893574  | 6.381047265  | 11.987992204 |
| Ni | 3.627220570  | 4.943446199  | 13.932825087 | Ni | 7.336522193  | 5.665966232  | 10.000000000 |
| Ni | 3.632308170  | 6.380311156  | 11.958411968 | Ni | 7.335883545  | 7.091228957  | 14.017360288 |
| Ni | 2.398236336  | 5.663783019  | 10.000000000 | Ni | 7.334575392  | 8.512949321  | 11.985850396 |
| Ni | 2.402813211  | 7.111421786  | 13.947440056 | Ni | 6.102896097  | 7.804843294  | 10.000000000 |
| Ni | 2.401824260  | 8.525318992  | 11.979926924 | Ni | 6.098187329  | 9.216937643  | 13.947425964 |
| Ni | 1.164610240  | 7.802660081  | 10.000000000 | Ni | 6.101919065  | 10.656420054 | 11.958077241 |
| Ni | 1.174542418  | 9.234750708  | 13.991124105 | Ni | 4.869270001  | 9.943720355  | 10.000000000 |
| Ni | 1.167382451  | 10.653089042 | 11.984628821 | Ni | 4.855262669  | 11.357797833 | 13.953119222 |
| Ni | -0.069015856 | 9.941537143  | 10.000000000 | Ni | 4.866973668  | 12.791809776 | 11.976483074 |
| Ni | -0.066305060 | 11.366920767 | 13.973637278 | Ni | 3.635643905  | 12.082597417 | 10.000000000 |
| Ni | -0.067387688 | 12.792412587 | 11.978414977 | Ni | 3.629533443  | 13.510050060 | 13.965558519 |
| Ni | -1.302641952 | 12.080414205 | 10.000000000 | Ni | 3.635503665  | 14.934354638 | 11.974511195 |
| Ni | -1.299747307 | 13.507210398 | 13.966796309 | Ni | 2.402017809  | 14.221474479 | 10.000000000 |
| Ni | -1.300371747 | 14.932739661 | 11.976679661 | Ni | 13.503813159 | 0.675400485  | 13.964980690 |
| Ni | -2.536268048 | 14.219291266 | 10.000000000 | Ni | 13.506674476 | 2.103055629  | 11.974914205 |
| Ni | 8.569466605  | 0.675520162  | 13.966651927 | Ni | 12.272917313 | 1.389303714  | 10.000000000 |
| Ni | 8.567398992  | 2.102683202  | 11.976568622 | Ni | 12.272115731 | 2.817397544  | 13.962315600 |
| Ni | 7.334631457  | 1.387120502  | 10.000000000 | Ni | 12.273174559 | 4.242521034  | 11.973659162 |
| Ni | 7.331994905  | 2.822129553  | 13.970348728 | Ni | 11.039291217 | 3.528180776  | 10.000000000 |
| Ni | 7.334210112  | 4.245292638  | 11.981785938 | Ni | 11.037986626 | 4.956501649  | 13.963388603 |
| Ni | 6.101005361  | 3.525997564  | 10.000000000 | Ni | 11.038793793 | 6.381897600  | 11.975288188 |
| Ni | 6.098319629  | 4.969800640  | 13.978799213 | Ni | 9.805665121  | 5.667057838  | 10.000000000 |

|    |              |              |              |   |              |              |              |
|----|--------------|--------------|--------------|---|--------------|--------------|--------------|
| Ni | 9.804283442  | 7.092705090  | 13.975159282 | C | -6.237810514 | 12.077343069 | 16.106568956 |
| Ni | 9.801355704  | 8.518461825  | 11.983270864 | C | -6.237404933 | 13.503697442 | 16.104582009 |
| Ni | 8.572039025  | 7.805934900  | 10.000000000 | C | -7.471861223 | 14.217135697 | 16.111544294 |
| Ni | 8.555597192  | 9.225488212  | 13.980072974 | C | 3.633116193  | 0.670734370  | 16.106473245 |
| Ni | 8.574178650  | 10.654374656 | 11.970204836 | C | 2.397988277  | 1.382992307  | 16.113180182 |
| Ni | 7.338412929  | 9.944811962  | 10.000000000 | C | 2.396929863  | 2.808355482  | 16.101417787 |
| Ni | 7.343616594  | 11.378529758 | 13.933870630 | C | 1.162209577  | 3.520920483  | 16.104987531 |
| Ni | 7.338614725  | 12.799882885 | 11.967140800 | C | 1.161494121  | 4.946269971  | 16.085551871 |
| Ni | 6.104786833  | 12.083689023 | 10.000000000 | C | -0.071278785 | 5.661004276  | 16.098401877 |
| Ni | 6.099143388  | 13.505168435 | 13.959329452 | C | -0.067980675 | 7.087856442  | 16.111528576 |
| Ni | 6.103420884  | 14.935277967 | 11.974880504 | C | -1.303171792 | 7.799466212  | 16.119620858 |
| Ni | 4.871160737  | 14.222566085 | 10.000000000 | C | -1.293857499 | 9.224668554  | 16.103549856 |
| Ni | 15.973911941 | 0.677647760  | 13.963444283 | C | -2.531003428 | 9.937881578  | 16.098826171 |
| Ni | 15.976387660 | 2.104377091  | 11.974741427 | C | -2.530857380 | 11.364491935 | 16.101574095 |
| Ni | 14.742060242 | 1.390395321  | 10.000000000 | C | -3.766698363 | 12.077073161 | 16.104778044 |
| Ni | 14.742436333 | 2.816853983  | 13.963122407 | C | -3.766613104 | 13.503463639 | 16.105439250 |
| Ni | 14.743009101 | 4.244139797  | 11.975007801 | C | -5.001535206 | 14.216370186 | 16.105790617 |
| Ni | 13.508434146 | 3.529272382  | 10.000000000 | C | 6.102774355  | 0.671251885  | 16.110270065 |
| Ni | 13.507604638 | 4.956296556  | 13.962537499 | C | 4.868212575  | 1.384090362  | 16.107987902 |
| Ni | 13.508840722 | 6.382921526  | 11.974024085 | C | 4.866943010  | 2.810698558  | 16.099308334 |
| Ni | 12.274808050 | 5.668149444  | 10.000000000 | C | 3.632059193  | 3.520320783  | 16.082105220 |
| Ni | 12.273721411 | 7.095332362  | 13.964709913 | C | 3.631419900  | 4.945827693  | 16.029538785 |
| Ni | 12.273197423 | 8.521678855  | 11.976768790 | C | 2.396237394  | 5.658467127  | 16.031756574 |
| Ni | 11.041181954 | 7.807026506  | 10.000000000 | C | 2.395513098  | 7.083432822  | 16.005636917 |
| Ni | 11.031247330 | 9.231397924  | 13.972848114 | C | 1.165498555  | 7.798536633  | 16.098711847 |
| Ni | 11.041983640 | 10.657725132 | 11.977286234 | C | 1.189703929  | 9.225626832  | 16.155159651 |
| Ni | 9.807555858  | 9.945903568  | 10.000000000 | C | -0.052361845 | 9.935704508  | 16.115572919 |
| Ni | 9.808911026  | 11.370030247 | 13.959430544 | C | -0.057422192 | 11.362074691 | 16.121576288 |
| Ni | 9.809122614  | 12.798347009 | 11.972396676 | C | -1.293871311 | 12.075716367 | 16.107754116 |
| Ni | 8.573929762  | 12.084780630 | 10.000000000 | C | -1.296299011 | 13.502502213 | 16.104716387 |
| Ni | 8.577305024  | 13.515126835 | 13.957749448 | C | -2.531223729 | 14.216593583 | 16.106650759 |
| Ni | 8.574307396  | 14.938246899 | 11.973968870 | C | 8.571559200  | 0.672037983  | 16.104999087 |
| Ni | 7.340303666  | 14.223657692 | 10.000000000 | C | 7.336777290  | 1.386715090  | 16.114788575 |
| C  | 1.162796396  | 0.670727048  | 16.115385982 | C | 7.334901965  | 2.813302927  | 16.118406735 |
| C  | -0.071771980 | 1.383300772  | 16.119663301 | C | 6.101086336  | 3.528128276  | 16.116692520 |
| C  | -0.072424966 | 2.808904749  | 16.112704547 | C | 6.100359412  | 4.950986789  | 16.105967001 |
| C  | -1.307123523 | 3.522379893  | 16.107265221 | C | 4.867864872  | 5.660693307  | 16.005586962 |
| C  | -1.307163865 | 4.948529840  | 16.104104084 | C | 4.873523867  | 7.088327394  | 15.943412627 |
| C  | -2.541983343 | 5.661552766  | 16.105268897 | C | 3.635824309  | 7.800231547  | 15.884460407 |
| C  | -2.539646820 | 7.088167279  | 16.108055389 | C | 3.713624868  | 9.184652207  | 16.465876514 |
| C  | -3.776083447 | 7.800360485  | 16.102980314 | C | 2.424583619  | 9.927175245  | 16.245933053 |
| C  | -3.769880742 | 9.226242305  | 16.104253028 | C | 2.415868295  | 11.348853148 | 16.192159858 |
| C  | -5.006255830 | 9.938261901  | 16.116361056 | C | 1.180149162  | 12.069953159 | 16.137699601 |
| C  | -5.003104725 | 11.364765846 | 16.109244168 | C | 1.175460979  | 13.500080348 | 16.118799468 |

C -0.060561703 14.215260985 16.103876477  
C 11.038257787 0.674888250 16.109877114  
C 9.803231929 1.390240669 16.101735874  
C 9.800359793 2.818925948 16.095257937  
C 8.563803547 3.534919862 16.102072406  
C 8.559093322 4.965565514 16.117998312  
C 7.323105681 5.688946242 16.174068102  
C 7.310464627 7.107890359 16.261985890  
C 6.024666844 7.853440586 16.530799638  
C 6.110234101 9.227707814 15.928005230  
C 4.869342550 9.944424537 15.868000060  
C 4.871599835 11.375233930 16.025911902  
C 3.641002317 12.081148673 16.159831214  
C 3.638579559 13.505385575 16.140124509  
C 2.405310624 14.220278295 16.135731181  
C 13.506757784 0.677610096 16.103426772  
C 12.272128845 1.390882646 16.104501880  
C 12.270954734 2.817740137 16.099476968  
C 11.035541508 3.532056678 16.098023920  
C 11.033426548 4.958499476 16.102361423  
C 9.795935349 5.673082142 16.122301492  
C 9.790230726 7.097918160 16.130790625  
C 8.546601981 7.806219718 16.202337140  
C 8.571756180 9.234440713 16.142636646  
C 7.341763920 9.946172114 16.021681140  
C 7.342953059 11.374497041 16.034006993  
C 6.106959961 12.087376819 16.038011443  
C 6.107428431 13.513216890 16.089518092  
C 4.871497624 14.222782538 16.106784592  
C 15.977264108 0.678675850 16.111519972  
C 14.741895702 1.391055728 16.105044322  
C 14.741231160 2.817465401 16.103651452  
C 13.506136900 3.530773157 16.103046839  
C 13.505861970 4.956998795 16.101213047  
C 12.269698535 5.669877453 16.100512261  
C 12.269336645 7.096212287 16.098560604  
C 11.031249156 7.809033165 16.111700126  
C 11.041288337 9.234335154 16.129009551  
C 9.805332582 9.945188394 16.138050864  
C 9.810006986 11.372274900 16.104444179  
C 8.577888855 12.087170392 16.083015279  
C 8.577063080 13.512965799 16.099788945  
C 7.342335836 14.225540196 16.104130033  
C 5.255930413 6.916382058 18.804412337

C 5.562408221 8.178656934 18.032147021  
C 4.217228071 8.956086110 18.006168744  
C 3.260844933 8.087724908 18.779246642  
H 6.372006876 8.727748183 18.531641231  
H 4.273096873 9.950118236 18.468846372  
O 5.999840293 6.016721788 19.100064607  
O 2.108990536 8.295608901 19.064757791  
O 3.894981645 6.882613762 19.142759642  
FS-G/Ni-DMBD  
Ni 1.162379022 0.673116408 13.961264023  
Ni 1.164553777 2.101469555 11.972461303  
Ni -0.073444473 1.384451149 10.000000000  
Ni -0.073820053 2.810624548 13.958671318  
Ni -0.069826648 4.240973354 11.971018850  
Ni -1.309056425 3.524736395 10.000000000  
Ni -1.307909517 4.951186835 13.958479932  
Ni -1.304604815 6.379352397 11.971116167  
Ni -2.544668376 5.665021641 10.000000000  
Ni -2.544589952 7.093626177 13.960952905  
Ni -2.542202933 8.518358864 11.973432995  
Ni -3.780280328 7.805306886 10.000000000  
Ni -3.779896017 9.232618826 13.962652781  
Ni -3.780266658 10.658730977 11.974869221  
Ni -5.015892280 9.945592132 10.000000000  
Ni -5.016474004 11.373004215 13.963518153  
Ni -5.016597805 12.799482893 11.974714890  
Ni -6.251504231 12.085877378 10.000000000  
Ni -6.253564277 13.513793464 13.962623851  
Ni -6.251736284 14.940955268 11.973896901  
Ni -7.487116183 14.226162624 10.000000000  
Ni 3.631673508 0.671592145 13.960918513  
Ni 3.633849876 2.101765333 11.972693532  
Ni 2.397868748 1.384502850 10.000000000  
Ni 2.402709915 2.819199580 13.961142603  
Ni 2.406501868 4.249001861 11.982446153  
Ni 1.162256796 3.524788095 10.000000000  
Ni 1.162771181 4.950939653 13.958216699  
Ni 1.175317445 6.384069759 11.982678921  
Ni -0.073355155 5.665073341 10.000000000  
Ni -0.069455524 7.089665762 13.951973518  
Ni -0.067203208 8.518925648 11.971213300  
Ni -1.308967107 7.805358587 10.000000000  
Ni -1.306079606 9.233593753 13.957842633  
Ni -1.307870040 10.658045730 11.973205823

|    |              |              |              |    |              |              |              |
|----|--------------|--------------|--------------|----|--------------|--------------|--------------|
| Ni | -2.544579059 | 9.945643833  | 10.000000000 | Ni | 2.399934295  | 12.795314702 | 11.970647419 |
| Ni | -2.545051476 | 11.372670508 | 13.962213908 | Ni | 1.162435431  | 12.086032479 | 10.000000000 |
| Ni | -2.544491986 | 12.799166349 | 11.974386638 | Ni | 1.160876362  | 13.512413599 | 13.959840277 |
| Ni | -3.780191010 | 12.085929078 | 10.000000000 | Ni | 1.163077889  | 14.937811127 | 11.974378166 |
| Ni | -3.781072960 | 13.512894490 | 13.962798068 | Ni | -0.073176521 | 14.226317725 | 10.000000000 |
| Ni | -3.780896243 | 14.940203181 | 11.973485039 | Ni | 11.047125865 | 0.670619194  | 13.963421622 |
| Ni | -5.015802962 | 14.226214324 | 10.000000000 | Ni | 11.046791918 | 2.097341380  | 11.974157834 |
| Ni | 6.103979839  | 0.669342124  | 13.959100077 | Ni | 9.811808410  | 1.384657951  | 10.000000000 |
| Ni | 6.102976217  | 2.100104987  | 11.970063235 | Ni | 9.812568848  | 2.810715357  | 13.962422750 |
| Ni | 4.869181969  | 1.384554550  | 10.000000000 | Ni | 9.811873126  | 4.238061140  | 11.972626535 |
| Ni | 4.869131992  | 2.812980050  | 13.956618710 | Ni | 8.576196459  | 3.524943197  | 10.000000000 |
| Ni | 4.864006669  | 4.246890740  | 11.976448529 | Ni | 8.581126229  | 4.948265342  | 13.953317005 |
| Ni | 3.633570017  | 3.524839796  | 10.000000000 | Ni | 8.573131711  | 6.379574059  | 11.968887043 |
| Ni | 3.643160847  | 4.978322540  | 14.006507402 | Ni | 7.340584507  | 5.665228443  | 10.000000000 |
| Ni | 3.639021284  | 6.387222553  | 12.013160983 | Ni | 7.339186648  | 7.085426215  | 13.952248802 |
| Ni | 2.397958065  | 5.665125042  | 10.000000000 | Ni | 7.331194073  | 8.519496437  | 11.972987194 |
| Ni | 2.427639465  | 7.094297400  | 14.039765372 | Ni | 6.104972555  | 7.805513688  | 10.000000000 |
| Ni | 2.408533573  | 8.511556886  | 11.991756040 | Ni | 6.087639459  | 9.212306788  | 13.999398951 |
| Ni | 1.162346114  | 7.805410287  | 10.000000000 | Ni | 6.100278212  | 10.647293959 | 11.981164793 |
| Ni | 1.181017764  | 9.221131289  | 13.964507491 | Ni | 4.869360604  | 9.945798934  | 10.000000000 |
| Ni | 1.165168820  | 10.653398955 | 11.969477685 | Ni | 4.869995687  | 11.371533121 | 13.958843821 |
| Ni | -0.073265838 | 9.945695533  | 10.000000000 | Ni | 4.868896021  | 12.794147797 | 11.972542490 |
| Ni | -0.073554528 | 11.369476532 | 13.955657176 | Ni | 3.633748652  | 12.086084180 | 10.000000000 |
| Ni | -0.071893602 | 12.797525342 | 11.972762650 | Ni | 3.634702609  | 13.511834063 | 13.959153118 |
| Ni | -1.308877790 | 12.085980779 | 10.000000000 | Ni | 3.633724037  | 14.938021221 | 11.974354017 |
| Ni | -1.309002609 | 13.512417151 | 13.961815320 | Ni | 2.398136700  | 14.226369426 | 10.000000000 |
| Ni | -1.308735157 | 14.939981463 | 11.973472290 | Ni | 13.518192114 | 0.671009540  | 13.962641954 |
| Ni | -2.544489741 | 14.226266025 | 10.000000000 | Ni | 13.518881406 | 2.097514072  | 11.973439301 |
| Ni | 8.576606113  | 0.670361339  | 13.963632812 | Ni | 12.283121631 | 1.384709651  | 10.000000000 |
| Ni | 8.575869014  | 2.097759149  | 11.972850099 | Ni | 12.282970006 | 2.811472982  | 13.961683959 |
| Ni | 7.340495189  | 1.384606250  | 10.000000000 | Ni | 12.283180604 | 4.238699040  | 11.973800222 |
| Ni | 7.340467069  | 2.808931795  | 13.954996815 | Ni | 11.047509679 | 3.524994897  | 10.000000000 |
| Ni | 7.336878501  | 4.240427756  | 11.971259483 | Ni | 11.048162244 | 4.951894903  | 13.962077179 |
| Ni | 6.104883238  | 3.524891496  | 10.000000000 | Ni | 11.047650852 | 6.378756163  | 11.972224476 |
| Ni | 6.108635525  | 4.955807755  | 13.961401740 | Ni | 9.811897728  | 5.665280143  | 10.000000000 |
| Ni | 6.099542434  | 6.380618551  | 11.972761000 | Ni | 9.814202299  | 7.093531344  | 13.952724022 |
| Ni | 4.869271286  | 5.665176742  | 10.000000000 | Ni | 9.809395295  | 8.519643270  | 11.969415399 |
| Ni | 4.899810501  | 7.078200002  | 14.044369161 | Ni | 8.576285776  | 7.805565389  | 10.000000000 |
| Ni | 4.864862249  | 8.509727614  | 12.007782284 | Ni | 8.575938476  | 9.231768150  | 13.954719123 |
| Ni | 3.633659334  | 7.805461988  | 10.000000000 | Ni | 8.573220680  | 10.657325460 | 11.973214352 |
| Ni | 3.645347806  | 9.203088563  | 14.034448293 | Ni | 7.340673824  | 9.945850635  | 10.000000000 |
| Ni | 3.636093724  | 10.644690696 | 11.980727803 | Ni | 7.337136009  | 11.364624791 | 13.962032921 |
| Ni | 2.398047383  | 9.945747234  | 10.000000000 | Ni | 7.338494400  | 12.795339489 | 11.973637346 |
| Ni | 2.400960293  | 11.370500505 | 13.946648316 | Ni | 6.105061873  | 12.086135880 | 10.000000000 |

|    |              |              |              |   |              |              |              |
|----|--------------|--------------|--------------|---|--------------|--------------|--------------|
| Ni | 6.105816229  | 13.512742967 | 13.960502972 | C | -0.072601721 | 7.090351597  | 16.052189869 |
| Ni | 6.104579402  | 14.937802126 | 11.973965761 | C | -1.308912012 | 7.807102828  | 16.079601925 |
| Ni | 4.869449921  | 14.226421126 | 10.000000000 | C | -1.308242330 | 9.233159245  | 16.099920069 |
| Ni | 15.989435681 | 0.671362715  | 13.962726308 | C | -2.544056054 | 9.946999916  | 16.115200785 |
| Ni | 15.990832525 | 2.098679883  | 11.973039376 | C | -2.543926789 | 11.373548510 | 16.113981150 |
| Ni | 14.754434852 | 1.384761352  | 10.000000000 | C | -3.780694620 | 12.086499936 | 16.108505956 |
| Ni | 14.753761515 | 2.812103165  | 13.961686646 | C | -3.781077215 | 13.513668570 | 16.104902809 |
| Ni | 14.755578835 | 4.239081693  | 11.973373634 | C | -5.017220781 | 14.226968540 | 16.106571974 |
| Ni | 13.518822900 | 3.525046598  | 10.000000000 | C | 6.102903275  | 0.672783345  | 16.099483993 |
| Ni | 13.518941795 | 4.952648230  | 13.962719671 | C | 4.866842040  | 1.385678969  | 16.097581254 |
| Ni | 13.520816488 | 6.379156691  | 11.973955766 | C | 4.865572104  | 2.812702438  | 16.081817860 |
| Ni | 12.283210948 | 5.665331843  | 10.000000000 | C | 3.631185029  | 3.529841784  | 16.087764123 |
| Ni | 12.284149066 | 7.092498409  | 13.963305560 | C | 3.633486688  | 4.956624493  | 16.123063087 |
| Ni | 12.283071137 | 8.518808687  | 11.973651356 | C | 2.394976719  | 5.673594546  | 16.123221133 |
| Ni | 11.047598997 | 7.805617089  | 10.000000000 | C | 2.421438670  | 7.095824610  | 16.117774601 |
| Ni | 11.048987436 | 9.234486522  | 13.958891995 | C | 1.173706587  | 7.797936446  | 16.030241988 |
| Ni | 11.046585826 | 10.659845889 | 11.974237007 | C | 1.163242728  | 9.232082054  | 16.052775443 |
| Ni | 9.811987045  | 9.945902335  | 10.000000000 | C | -0.070526807 | 9.945158861  | 16.092525817 |
| Ni | 9.810897783  | 11.374143917 | 13.961827196 | C | -0.072391473 | 11.373060025 | 16.097950894 |
| Ni | 9.810458154  | 12.798743262 | 11.974460914 | C | -1.308538225 | 12.086737988 | 16.113034573 |
| Ni | 8.576375093  | 12.086187581 | 10.000000000 | C | -1.309412939 | 13.513822831 | 16.107719350 |
| Ni | 8.574664506  | 13.511317690 | 13.962298711 | C | -2.545665072 | 14.227443854 | 16.105557880 |
| Ni | 8.576024985  | 14.939542548 | 11.974300377 | C | 8.573897126  | 0.673048115  | 16.105552873 |
| Ni | 7.340763142  | 14.226472827 | 10.000000000 | C | 7.337835713  | 1.387022247  | 16.099528466 |
| C  | 1.159656688  | 0.671900840  | 16.101122334 | C | 7.337121513  | 2.815735243  | 16.081838008 |
| C  | -0.076147448 | 1.385327657  | 16.100991434 | C | 6.098218748  | 3.530596975  | 16.052755239 |
| C  | -0.076638379 | 2.812779980  | 16.096670026 | C | 6.090460250  | 4.961971138  | 16.048582266 |
| C  | -1.312888360 | 3.526470043  | 16.103548372 | C | 4.852656862  | 5.695343207  | 16.098632758 |
| C  | -1.312995322 | 4.952625456  | 16.098073443 | C | 4.924629492  | 7.064506426  | 16.737498939 |
| C  | -2.547985844 | 5.666972626  | 16.101179500 | C | 3.568872007  | 7.846252876  | 16.753823316 |
| C  | -2.546508840 | 7.093464334  | 16.099216073 | C | 3.642174271  | 9.206463068  | 16.093341201 |
| C  | -3.782160236 | 7.807295121  | 16.109231313 | C | 2.410834919  | 9.938824955  | 16.010755952 |
| C  | -3.780864210 | 9.233917007  | 16.110375464 | C | 2.401188447  | 11.372556948 | 16.041082262 |
| C  | -5.017717323 | 9.946798874  | 16.109199793 | C | 1.162516711  | 12.085310456 | 16.076390102 |
| C  | -5.017554093 | 11.373725054 | 16.107658534 | C | 1.161859846  | 13.513507964 | 16.099535811 |
| C  | -6.253981375 | 12.086983532 | 16.110370328 | C | -0.073994153 | 14.226707501 | 16.108774737 |
| C  | -6.253260550 | 13.513823730 | 16.106705205 | C | 11.044475685 | 0.673520454  | 16.106859850 |
| C  | -7.489394437 | 14.226702872 | 16.105933518 | C | 9.808682178  | 1.387912536  | 16.108818269 |
| C  | 3.631906233  | 0.671757258  | 16.102223835 | C | 9.807996242  | 2.815414796  | 16.109889343 |
| C  | 2.395978064  | 1.385650166  | 16.099051263 | C | 8.572085661  | 3.529157033  | 16.101935415 |
| C  | 2.394988721  | 2.812678152  | 16.093327756 | C | 8.569856896  | 4.956450853  | 16.093940864 |
| C  | 1.159464993  | 3.525612307  | 16.091216239 | C | 7.334011030  | 5.669325996  | 16.063410301 |
| C  | 1.160421695  | 4.954285976  | 16.085488231 | C | 7.323093695  | 7.099462436  | 16.025822026 |
| C  | -0.076594065 | 5.664707237  | 16.081820741 | C | 6.064518090  | 7.802355493  | 16.061670104 |

|   |              |              |              |   |              |              |              |
|---|--------------|--------------|--------------|---|--------------|--------------|--------------|
| C | 6.099314393  | 9.229042638  | 16.095639379 | C | 12.279217794 | 7.094746826  | 16.104798427 |
| C | 4.859641987  | 9.942735257  | 16.096855570 | C | 11.042767358 | 7.807927729  | 16.101100116 |
| C | 4.865969339  | 11.371382490 | 16.077812595 | C | 11.044123569 | 9.234471430  | 16.102768140 |
| C | 3.633763338  | 12.088373617 | 16.078310386 | C | 9.808143849  | 9.947660778  | 16.102857873 |
| C | 3.632233695  | 13.515086085 | 16.100780457 | C | 9.809000155  | 11.374024107 | 16.107652363 |
| C | 2.396347544  | 14.228132577 | 16.103190776 | C | 8.572449051  | 12.086020056 | 16.105244316 |
| C | 13.516293195 | 0.672690831  | 16.106623836 | C | 8.573674978  | 13.513290176 | 16.104581368 |
| C | 12.280211010 | 1.386627306  | 16.107845719 | C | 7.338141274  | 14.226542430 | 16.103957200 |
| C | 12.279467498 | 2.813949684  | 16.105699205 | C | 4.252045749  | 8.812011015  | 18.990828331 |
| C | 11.043782424 | 3.528077402  | 16.112458390 | O | 4.187770118  | 10.106921714 | 19.437449264 |
| C | 11.043157370 | 4.954950823  | 16.107061873 | C | 5.428316736  | 8.138323479  | 18.980888731 |
| C | 9.806796962  | 5.668282127  | 16.098939948 | O | 6.583622175  | 8.739802405  | 19.411698936 |
| C | 9.805545669  | 7.094178659  | 16.078179737 | C | 5.392707026  | 6.837396056  | 18.251864349 |
| C | 8.566505272  | 7.809616313  | 16.038956808 | H | 6.363575739  | 6.334488082  | 18.246233513 |
| C | 8.571655559  | 9.235603058  | 16.078479107 | H | 4.675818439  | 6.135883561  | 18.706689158 |
| C | 7.332855741  | 9.944451351  | 16.081786662 | C | 3.142869142  | 8.129137856  | 18.263018652 |
| C | 7.336509752  | 11.373379446 | 16.095925524 | H | 2.222315292  | 8.719944733  | 18.254203298 |
| C | 6.102324544  | 12.086245145 | 16.093686285 | H | 2.888957779  | 7.161751834  | 18.724023960 |
| C | 6.102365346  | 13.512889332 | 16.100717630 | C | 2.893374208  | 10.689895896 | 19.607705576 |
| C | 4.867169543  | 14.227875397 | 16.107110837 | C | 7.735057414  | 7.912129903  | 19.591375978 |
| C | 15.987448246 | 0.671836020  | 16.102163899 | H | 3.066793208  | 11.647776814 | 20.111587716 |
| C | 14.751654735 | 1.386471909  | 16.104510916 | H | 2.243364112  | 10.056758691 | 20.233666774 |
| C | 14.751060347 | 2.813544022  | 16.103913252 | H | 2.401267778  | 10.873433035 | 18.637324140 |
| C | 13.515219423 | 3.527357368  | 16.104838911 | H | 8.482374360  | 8.545354089  | 20.082901089 |
| C | 13.515188059 | 4.954380280  | 16.103383606 | H | 8.136202199  | 7.561353765  | 18.625603432 |
| C | 12.279241271 | 5.667883182  | 16.104789863 | H | 7.512043954  | 7.042882969  | 20.231023569 |
